# Supplementary material
Source: PubMed Central journal article supplement (PMC3094471)
Supplement: NIHMS288843-supplement-1_si_001.pdf [file NIHMS288843-supplement-1_si_001.pdf]

Supporting Information

**Phosphine-Catalyzed  $\beta'$ -Umpolung Addition of Nucleophiles to Activated  $\alpha$ -Alkyl Allenes**

Tioga J. Martin, Venus G. Vakhshori, Yang S. Tran, and Ohyun Kwon\*

*Department of Chemistry and Biochemistry, University of California, Los Angeles, CA 90095-1569*

**Contents**

|                                                                                                    |     |
|----------------------------------------------------------------------------------------------------|-----|
| General Information                                                                                | S2  |
| Synthesis of Activated $\alpha$ -Alkyl Allenes                                                     | S3  |
| General Procedure for Phosphine-Catalyzed $\beta'$ -Umpolung Addition                              | S4  |
| Characterization of $\beta'$ -Umpolung Addition Products                                           | S4  |
| Synthesis of 3,4-Dimethylcoumarin                                                                  | S17 |
| Copies of $^1\text{H}$ , $^{13}\text{C}$ , NOESY, and $^{19}\text{F}$ NMR Spectra of New Compounds | S20 |
| Copy of HPLC Traces                                                                                | S75 |

## General Information

All reactions were performed under Ar atmospheres with dry solvents and anhydrous conditions, unless otherwise noted. Benzene was distilled from CaH<sub>2</sub>. Reactions were monitored using thin layer chromatography (TLC) on 0.25-mm E. Merck silica gel plates (60F-254) and visualized under UV light or through anisaldehyde or permanganate staining. Flash column chromatography was performed using E. Merck silica gel 60 (230–400 mesh) and compressed air. IR spectra were recorded on a Perkin–Elmer pargon 1600 FT-IR spectrometer. NMR spectra were recorded using Bruker Avance-500, ARX-500, or ARX-400 instruments and calibrated using residual CHCl<sub>3</sub> as the internal reference (7.26 ppm for <sup>1</sup>H NMR; 77.00 ppm for <sup>13</sup>C NMR). Data for <sup>1</sup>H NMR spectra are reported as follows: chemical shift (δ/ppm), multiplicity, coupling constant (Hz), and integration. Data for <sup>13</sup>C NMR spectra are reported in terms of chemical shift, with multiplicities and coupling constants (Hz) in the case of *J*<sub>CF</sub> coupling. The following abbreviations are used for the multiplicities: s = singlet; d = doublet; t = triplet; q = quartet; m = multiplet; br = broad; app = apparent. High-resolution matrix-assisted laser desorption/ionization (MALDI) mass spectra were recorded from a dihydroxybenzoic acid (DHB) matrix using an IonSpec Ultima 7T FT-ICR-MS instrument with internal calibration. Gas chromatography–coupled mass spectra (EI) were recorded using an Agilent 6890-5975 instrument.

Synthesis of Activated  $\alpha$ -Alkyl Allenes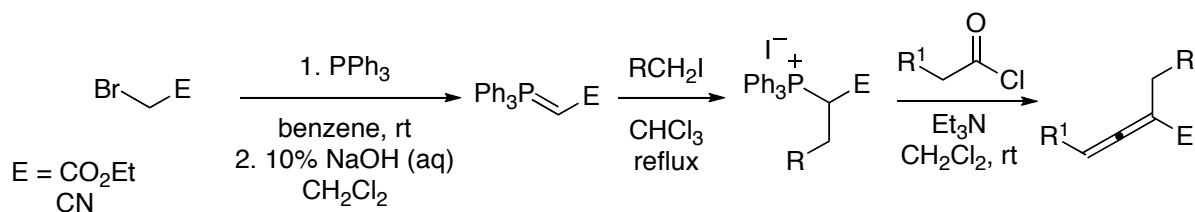

Two new activated  $\alpha$ -alkyl allenenes were prepared in this study, using slightly modified literature procedures.<sup>1b</sup> The syntheses of the other allenates have been reported previously.<sup>1</sup> The spectral data of the new allenenes are reported below:

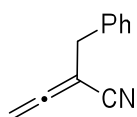

Yield: 61%; faint yellow oil; IR (film)  $\nu_{\text{max}}$  3064, 3030, 2988, 2219, 1967, 1496, 1454  $\text{cm}^{-1}$ ; <sup>1</sup>H NMR (400 MHz, CDCl<sub>3</sub>)  $\delta$  7.38–7.25 (m, 5H), 5.24 (t,  $J$  = 2.4 Hz, 2H), 3.51 (t,  $J$  = 2.8 Hz, 2H); <sup>13</sup>C NMR (100 MHz, CDCl<sub>3</sub>)  $\delta$  215.1, 136.1, 128.8 (2C), 128.7 (2C), 127.4, 115.0, 82.3, 80.9, 37.3; MS (MALDI) calcd for C<sub>11</sub>H<sub>9</sub>Na [M + Na]<sup>+</sup> 176.08, found 176.00.

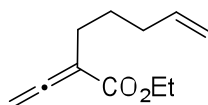

Yield: 78%; faint yellow oil; IR (film)  $\nu_{\text{max}}$  3076, 2979, 2932, 1967, 1940, 1711, 1261  $\text{cm}^{-1}$ ; <sup>1</sup>H NMR (400 MHz, CDCl<sub>3</sub>)  $\delta$  5.77 (ddt,  $J$  = 8.0, 8.0, 4.0 Hz, 1H), 5.10 (d,  $J$  = 3.0 Hz, 2H), 4.95 (dd,  $J$  = 24.0, 12.0 Hz, 2H), 4.17 (q,  $J$  = 6.7 Hz, 2H), 2.24–2.18 (m, 2H), 2.09–2.03 (m, 2H), 1.53 (pentet,  $J$  = 6.0 Hz, 2H), 1.25 (t,  $J$  = 4.0 Hz, 3H); <sup>13</sup>C NMR (100 MHz, CDCl<sub>3</sub>)  $\delta$  213.7, 167.2, 138.3, 114.7, 100.1, 80.0, 79.2, 60.9, 33.1, 27.2, 14.1; MS (MALDI) calcd for C<sub>11</sub>H<sub>16</sub>O<sub>2</sub>Na [M + Na]<sup>+</sup> 203.1, found 202.9.

<sup>1</sup> (a) Bestman, H. J.; Hartun, H. *Angew. Chem.* **1963**, *75*, 297. (b) Runge, W.; Kresze, G; Ruch, E. *Justus Liebigs Annalen der Chemie* **1975**, *7–8*, 1361–1378. (c) Bertrand, M.; Zahra, J. P. *Tetrahedron Lett.* **1989**, *30*, 4117–4120. (b) Andrews, S.; Day, A.; Inwood, R. *J. Chem. Soc. (C)*, **1969**, 2443–2449. (d) Yang, H.; Xu, B.; Hammond, G. *Org. Lett.* **2008**, *10*, 5589–5591. (e) Zhu, X; Lan, J; Kwon, O. *J. Am. Chem. Soc.* **2003**, *125*, 4716–4717. (f) Xu, S.; Zhou, L.; Ma, R.; Song, H.; He, Z. *Org. Lett.* **2010**, *12*, 544–547.

### General Procedure for Phosphine-Catalyzed $\beta'$ -Umpolung Addition

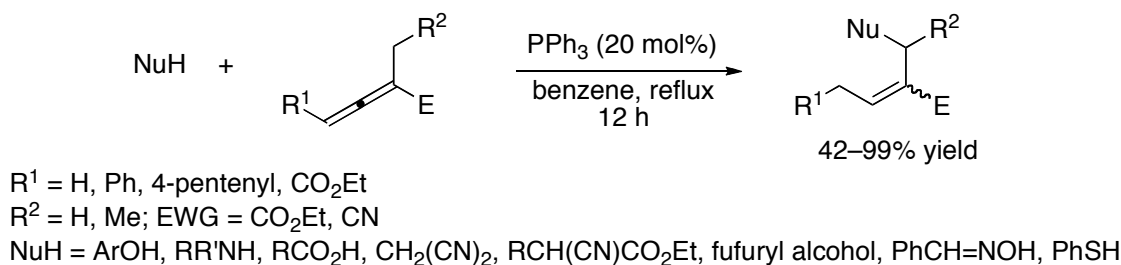

A round-bottom flask equipped with a stirrer bar and a condenser was flame-dried and left to cool under Ar. The pronucleophile (1.0 equiv) and the phosphine (0.2 equiv) were added to the flask. Distilled benzene was added via syringe. Finally, the allene (1.1 equiv) was weighed in a syringe, mixed with distilled benzene and added dropwise to the reaction mixture over 5 h. The reaction was left to proceed until the pronucleophile was consumed, typically 12 h (TLC, 6:1 hexane/EtOAc). The crude reaction mixture was concentrated and loaded onto a silica gel column and separated chromatographically (hexane/EtOAc, 6:1). In all cases, the product stained brightly with a standard permanganate stain.

Assignments of the geometries of the trisubstituted alkenes were made based on the chemical shift of the  $\beta$ -vinyl proton of the enoate,<sup>2</sup> and further confirmed through NOESY-NMR spectroscopic analysis of the selected compounds **1a**, **1c**, **1p**, **1q**, **1r**, **2f**, **3d**, **3f**, **3g**, **4**, **E-5c**, and **Z-5c**. See S23, S26, S39, S41, S43, S49, S56, S58, S60, S63, S67, and S69 for NOESY-NMR spectra.

### Characterization of $\beta'$ -Umpolung Addition Products

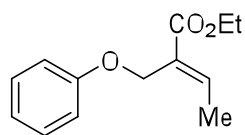

**1a**

Yield: >99%; clear oil; IR (film)  $\nu_{\text{max}}$  3062, 3039, 2981, 2905, 1713, 1599, 1284, 1236, 1072,

<sup>2</sup> Nair, M. D.; Adams, R. *J. Am. Chem. Soc.* **1960**, *82*, 3786–3787.

1029  $\text{cm}^{-1}$ ;  $^1\text{H}$  NMR (500 MHz,  $\text{CDCl}_3$ )  $\delta$  7.31–7.27 (m, 2H), 7.22 (q,  $J = 6.7$  Hz, 1H), 6.97–6.95 (m, 3H), 4.79 (s, 2H), 4.23 (q,  $J = 7.2$  Hz, 2H), 1.96 (d,  $J = 7.0$  Hz, 3H), 1.29 (t,  $J = 7.0$  Hz, 3H);  $^{13}\text{C}$  NMR (125 MHz,  $\text{CDCl}_3$ )  $\delta$  166.5, 158.6, 144.2, 129.3 (2C), 128.9, 120.8, 114.7 (2C), 61.5, 60.6, 14.6, 14.1; MS (MALDI) calcd for  $\text{C}_{13}\text{H}_{16}\text{O}_3\text{Na}$   $[\text{M} + \text{Na}]^+$  243.09, found 243.10.

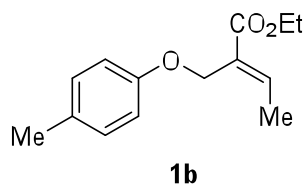

Yield: 97%; clear oil; IR (film)  $\nu_{\text{max}}$  3029, 2981, 1713, 1510, 1283, 1140, 1015, 1071  $\text{cm}^{-1}$ ;  $^1\text{H}$  NMR (500 MHz,  $\text{CDCl}_3$ )  $\delta$  7.21 (q,  $J = 6.7$  Hz, 1H), 7.09 (d,  $J = 8.8$  Hz, 2H), 6.87 (d,  $J = 8.8$  Hz, 1H), 4.77 (s, 2H), 4.24 (q,  $J = 6.7$  Hz, 2H), 2.30 (s, 3H), 1.95 (d,  $J = 8.0$  Hz, 3H), 1.29 (t,  $J = 6.7$  Hz, 3H);  $^{13}\text{C}$  NMR (125 MHz,  $\text{CDCl}_3$ )  $\delta$  166.6, 156.6, 144.2, 144.1, 130.2, 129.8, 129.2, 114.8 (2C), 61.9, 60.7, 20.4, 14.7, 14.2; MS (MALDI) calcd for  $\text{C}_{14}\text{H}_{18}\text{O}_3\text{Na}$   $[\text{M} + \text{Na}]^+$  257.11, found 257.18.

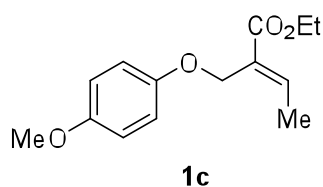

Yield: 92%; clear oil; IR (film)  $\nu_{\text{max}}$  2882, 2951, 2906, 2834, 1713, 1507, 1284, 1227  $\text{cm}^{-1}$ ;  $^1\text{H}$  NMR (400 MHz,  $\text{CDCl}_3$ )  $\delta$  7.18 (q,  $J = 8.0$  Hz, 1H), 6.86 (dd,  $J = 22.0, 9.0$  Hz, 4H), 4.73 (s, 2H), 4.22 (q,  $J = 7.0$  Hz, 2H), 3.75 (s, 3H), 1.93 (d,  $J = 8.0$  Hz, 3H), 1.28 (t,  $J = 7.0$  Hz, 3H);  $^{13}\text{C}$  NMR (100 MHz,  $\text{CDCl}_3$ )  $\delta$  166.6, 154.1, 152.9, 144.1, 144.0, 129.2, 116.1, 62.6, 60.7, 55.6, 14.7, 14.2; MS (MALDI) calcd for  $\text{C}_{14}\text{H}_{18}\text{O}_4\text{Na}$   $[\text{M} + \text{Na}]^+$  273.11, found 273.13.

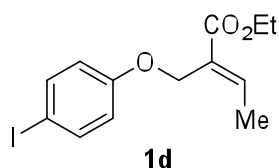

Yield: 69%; clear oil; IR (film)  $\nu_{\text{max}}$  2978, 1705, 1485, 1279, 1230, 1140  $\text{cm}^{-1}$ ;  $^1\text{H}$  NMR (400 MHz,  $\text{CDCl}_3$ )  $\delta$  7.55 (d,  $J = 9.0$  Hz, 2H), 7.20 (q,  $J = 7.0$  Hz, 1H), 6.73 (d,  $J = 9.0$  Hz, 2H), 4.75

(s, 2H), 4.22 (q,  $J = 7.0$  Hz, 2H), 1.94 (d,  $J = 7.0$  Hz, 3H), 1.28 (t,  $J = 7.0$  Hz, 3H);  $^{13}\text{C}$  NMR (100 MHz,  $\text{CDCl}_3$ )  $\delta$  166.4, 158.6, 144.5, 138.1, 129.1, 128.7, 117.3 (2C), 83.0, 61.8, 60.8, 14.7, 14.2; MS (MALDI) calcd for  $\text{C}_{13}\text{H}_{15}\text{O}_3\text{INa}$   $[\text{M} + \text{Na}]^+$  368.99, found 369.01.

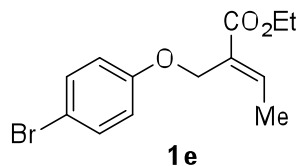

Yield: 72%; clear oil; IR (film)  $\nu_{\text{max}}$  2919, 2915, 2848, 1708, 1487, 1228  $\text{cm}^{-1}$ ;  $^1\text{H}$  NMR (400 MHz,  $\text{CDCl}_3$ )  $\delta$  7.34 (d,  $J = 9.0$  Hz, 2H), 7.21 (q,  $J = 7.0$  Hz, 1H), 6.84 (d,  $J = 9.0$  Hz, 2H), 4.75 (s, 2H), 4.22 (q,  $J = 7.0$  Hz, 2H), 1.94 (d,  $J = 7.0$  Hz, 3H), 1.28 (t,  $J = 7.0$  Hz, 3H);  $^{13}\text{C}$  NMR (100 MHz,  $\text{CDCl}_3$ )  $\delta$  166.4, 157.9, 144.5, 132.2 (2C), 128.7, 116.7 (2C), 113.1, 62.0, 60.8, 14.7, 14.2; MS (MALDI) calcd for  $\text{C}_{13}\text{H}_{15}\text{O}_3\text{BrNa}$   $[\text{M} + \text{Na}]^+$  321.01, found 321.04.

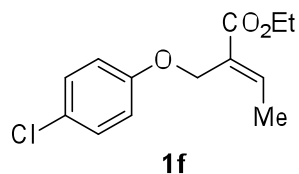

Yield: 62%; clear oil; IR (film)  $\nu_{\text{max}}$  2980, 2932, 1707, 1491, 1280, 1234, 1141, 1004  $\text{cm}^{-1}$ ;  $^1\text{H}$  NMR (400 MHz,  $\text{CDCl}_3$ )  $\delta$  7.26–7.17 (m, 3H), 6.88 (d,  $J = 9.0$  Hz, 2H), 4.75 (s, 2H), 4.22 (q,  $J = 7.0$  Hz, 2H), 1.93 (d,  $J = 7.0$  Hz, 3H), 1.27 (t,  $J = 7.0$  Hz, 3H);  $^{13}\text{C}$  NMR (100 MHz,  $\text{CDCl}_3$ )  $\delta$  166.4, 157.4, 144.4, 129.2 (2C), 128.7, 125.8, 116.2 (2C), 62.1, 60.8, 14.7, 14.2; MS (MALDI) calcd for  $\text{C}_{13}\text{H}_{15}\text{O}_3\text{ClNa}$   $[\text{M} + \text{Na}]^+$  277.06, found 277.26.

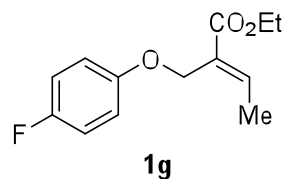

Yield: 78%; clear oil; IR (film)  $\nu_{\text{max}}$  2982, 1713, 1505, 1283, 1212, 1141, 1012  $\text{cm}^{-1}$ ;  $^1\text{H}$  NMR (400 MHz,  $\text{CDCl}_3$ )  $\delta$  7.20 (q,  $J = 7.0$  Hz, 1H), 6.98–6.87 (m, 4H), 4.74 (s, 2H), 4.22 (q,  $J = 7.0$  Hz, 2H), 1.94 (d,  $J = 7.0$  Hz, 3H), 1.28 (t,  $J = 7.0$  Hz, 3H);  $^{13}\text{C}$  NMR (100 MHz,  $\text{CDCl}_3$ )  $\delta$  166.5, 158.6, 156.2, 154.9, 144.3, 129.1, 128.9, 116.1 (d,  $J_{\text{FC}} = 8.0$  Hz), 115.8 (2C), 115.6 (2C), 62.5, 60.8, 14.7, 14.2;  $^{19}\text{F}$  NMR (376 MHz,  $\text{CDCl}_3$ )  $\delta$  -124.27; MS (MALDI) calcd for  $\text{C}_{13}\text{H}_{15}\text{O}_3\text{FNa}$   $[\text{M} + \text{Na}]^+$  261.09, found 261.13.

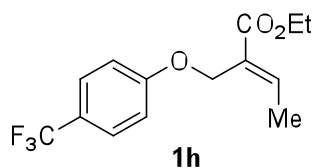

Yield: 73%; clear oil; IR (film)  $\nu_{\max}$  2983, 2937, 1712, 1327, 1253, 1110, 1068  $\text{cm}^{-1}$ ;  $^1\text{H}$  NMR (400 MHz,  $\text{CDCl}_3$ )  $\delta$  7.54 (d,  $J = 9.0$  Hz, 2H), 7.23 (q,  $J = 7.0$  Hz, 1H), 7.01 (d,  $J = 9.0$  Hz, 2H), 4.83 (s, 2H), 4.23 (q,  $J = 7.0$  Hz, 2H), 1.95 (d,  $J = 7.0$  Hz, 3H), 1.28 (t,  $J = 7.0$  Hz, 3H);  $^{13}\text{C}$  NMR (100 MHz,  $\text{CDCl}_3$ )  $\delta$  166.3, 161.2, 144.7, 128.4, 126.8 (d,  $J_{\text{FC}} = 4.0$  Hz), 123.2, 121.1, 114.7 (2C), 61.8, 60.9, 14.7, 14.2;  $^{19}\text{F}$  NMR (376 MHz,  $\text{CDCl}_3$ )  $\delta$  -62.10; MS (MALDI) calcd for  $\text{C}_{14}\text{H}_{15}\text{O}_3\text{F}_3\text{Na}$   $[\text{M} + \text{Na}]^+$  311.08, found 311.19.

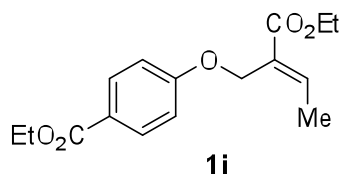

Yield: 90%; clear oil; IR (film)  $\nu_{\max}$  2981, 2934, 2907, 1717, 1606, 1510, 1276, 1249, 1168, 1103, 1019  $\text{cm}^{-1}$ ;  $^1\text{H}$  NMR (400 MHz,  $\text{CDCl}_3$ )  $\delta$  7.98 (d,  $J = 9.0$  Hz, 2H), 7.22 (q,  $J = 7.0$  Hz, 1H), 7.95 (d,  $J = 9.0$  Hz, 2H), 4.83 (s, 2H), 4.33 (q,  $J = 7.0$  Hz, 2H), 4.22 (q,  $J = 7.0$  Hz, 2H), 1.95 (d,  $J = 7.0$  Hz, 3H), 1.37 (t,  $J = 7.0$  Hz, 3H), 1.27 (t,  $J = 7.0$  Hz, 3H);  $^{13}\text{C}$  NMR (100 MHz,  $\text{CDCl}_3$ )  $\delta$  166.3, 162.4, 144.7, 144.6, 131.4 (2C), 129.1, 128.5 (2C), 123.1, 114.3, 61.8, 60.8, 60.6, 14.7, 14.3; MS (MALDI) calcd for  $\text{C}_{16}\text{H}_{20}\text{O}_5\text{Na}$   $[\text{M} + \text{Na}]^+$  315.12, found 315.23.

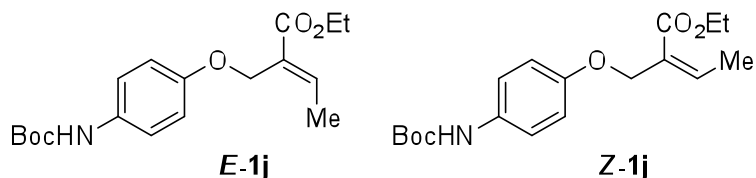

Yield: 89%; 4:1 E:Z selectivity; clear oil; IR (film)  $\nu_{\max}$  3347, 2979, 2933, 1717, 1703, 1520, 1226, 1160, 1053, 1011  $\text{cm}^{-1}$ ;  $^1\text{H}$  NMR (500 MHz,  $\text{CDCl}_3$ ), major:  $\delta$  7.24 (s, 2H), 7.18 (q,  $J = 8.0$  Hz, 1H), 6.88 (d,  $J = 9.0$  Hz, 2H), 6.39 (s, 1H), 4.74 (s, 2H), 4.21 (q,  $J = 8.0$  Hz, 2H), 1.92 (d,  $J = 7.0$  Hz, 3H), 1.50 (s, 9H), 1.27 (t,  $J = 7.0$  Hz, 3H); minor:  $\delta$  7.24 (s, 2H), 6.84 (d,  $J = 9.0$  Hz, 2H), 6.44 (q,  $J = 7.0$  Hz, 1H), 4.62 (s, 2H), 4.24 (q,  $J = 7.0$  Hz, 2H), 2.08 (d,  $J = 7.0$  Hz, 3H), 1.50 (s, 9H), 1.29 (t,  $J = 7.0$  Hz, 3H);  $^{13}\text{C}$  NMR (125 MHz,  $\text{CDCl}_3$ )  $\delta$  166.5, 154.7, 153.0, 144.1, 140.8, 131.6, 128.9, 120.3, 115.3, 80.1, 69.2, 62.1, 60.6, 60.2, 28.2, 15.5, 14.6, 14.1; MS

(MALDI) calcd for  $C_{18}H_{25}O_5NNa$   $[M + Na]^+$  358.16, found 358.22.

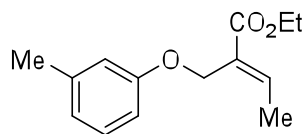**1k**

Yield: 95%; clear oil; IR (film)  $\nu_{max}$  2980, 1714, 1285, 1260, 1234, 1140, 1038  $cm^{-1}$ ;  $^1H$  NMR (500 MHz,  $CDCl_3$ )  $\delta$  7.22 (q,  $J = 7.0$  Hz, 1H), 7.18 (t,  $J = 6.0$  Hz, 1H), 6.79–6.77 (m, 3H), 4.78 (s, 2H), 4.24 (q,  $J = 6.7$  Hz, 2H), 2.34 (s, 3H), 1.95 (d,  $J = 8.0$  Hz, 3H), 1.30 (t,  $J = 6.7$  Hz, 3H);  $^{13}C$  NMR (125 MHz,  $CDCl_3$ )  $\delta$  166.6, 158.8, 144.2, 139.4, 129.1 (2C), 121.7, 115.7, 111.7, 61.6, 60.7, 21.5, 14.7, 14.2; MS (MALDI) calcd for  $C_{14}H_{18}O_3Na$   $[M + Na]^+$  257.11, found 257.38.

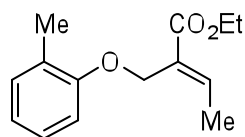**1l**

Yield: 96%; clear oil; IR (film)  $\nu_{max}$  2980, 2946, 1714, 1495, 1282, 1240, 1120, 1016  $cm^{-1}$ ;  $^1H$  NMR (500 MHz,  $CDCl_3$ )  $\delta$  7.21 (q,  $J = 7.0$  Hz, 1H), 7.18–7.13 (m, 2H), 6.95 (d,  $J = 8.0$  Hz, 1H), 6.88 (dt,  $J = 1.0, 8.0$  Hz, 1H), 4.80 (s, 2H), 4.24 (q,  $J = 6.7$  Hz, 2H), 2.20 (s, 3H), 1.96 (d,  $J = 8.0$  Hz, 3H), 1.30 (t,  $J = 6.7$  Hz, 3H);  $^{13}C$  NMR (125 MHz,  $CDCl_3$ )  $\delta$  166.7, 156.9, 143.9, 130.6, 129.1, 127.2, 126.7, 120.6, 111.8, 61.9, 60.7, 16.1, 14.7, 14.2; MS (MALDI) calcd for  $C_{14}H_{18}O_3Na$   $[M + Na]^+$  257.11, found 257.31.

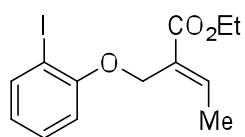**1m**

Yield: 91%; clear oil; IR (film)  $\nu_{max}$  3060, 2979, 2848, 1713, 1471, 1275, 1230, 1017  $cm^{-1}$ ;  $^1H$  NMR (400 MHz,  $CDCl_3$ )  $\delta$  7.75 (dd,  $J = 1.0, 7.0$  Hz, 1H), 7.29 (dd,  $J = 1.0, 7.0$  Hz, 1H), 7.23 (q,  $J = 7.0$  Hz, 1H), 6.96 (dd,  $J = 1.0, 7.0$  Hz, 1H), 6.71 (dt,  $J = 1.0, 7.0$  Hz, 1H), 4.86 (s, 2H), 4.24 (q,  $J = 7.0$  Hz, 2H), 2.00 (d,  $J = 7.0$  Hz, 3H), 1.29 (t,  $J = 7.0$  Hz, 3H);  $^{13}C$  NMR (100 MHz,  $CDCl_3$ )  $\delta$  166.5, 157.3, 144.9, 139.4, 129.4, 128.5, 122.8, 113.2, 86.9, 63.1, 60.8, 15.1, 14.2; MS (MALDI) calcd for  $C_{13}H_{15}O_3INa$   $[M + Na]^+$  368.99, found 369.12.



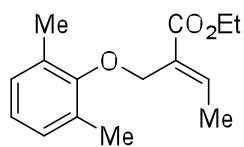**1n**

Yield: 66%; clear oil; IR (film)  $\nu_{\max}$  2980, 2957, 1717, 1280, 1262, 1230, 1195  $\text{cm}^{-1}$ ;  $^1\text{H}$  NMR (400 MHz,  $\text{CDCl}_3$ )  $\delta$  7.20 (q,  $J = 7.0$  Hz, 1H), 7.02–6.90 (m, 3H), 4.60 (s, 2H), 4.26 (q,  $J = 7.0$  Hz, 2H), 2.34 (s, 6H), 1.96 (d,  $J = 7.0$  Hz, 3H), 1.32 (t,  $J = 7.0$  Hz, 3H);  $^{13}\text{C}$  NMR (100 MHz,  $\text{CDCl}_3$ )  $\delta$  166.9, 155.5, 143.8, 143.7, 131.2, 129.8, 128.8, 123.9, 64.9, 60.7, 16.4, 14.6, 14.2; MS (MALDI) calcd for  $\text{C}_{15}\text{H}_{20}\text{O}_3\text{Na}$   $[\text{M} + \text{Na}]^+$  271.13, found 271.21.

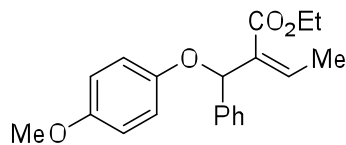**1p**

Yield: 89%; clear oil; IR (film)  $\nu_{\max}$  2916, 2848, 1715, 1506, 1224, 1035  $\text{cm}^{-1}$ ;  $^1\text{H}$  NMR (400 MHz,  $\text{CDCl}_3$ )  $\delta$  7.40–7.26 (m, 5H), 6.84 (d,  $J = 9.0$  Hz, 2H), 6.75 (d,  $J = 9.0$  Hz, 2H), 6.20 (dq,  $J = 6.0, 1.0$  Hz, 1H), 5.99 (s, 1H), 4.20 (q,  $J = 7.0$  Hz, 2H), 3.73 (s, 3H), 2.01 (dd,  $J = 6.0, 1.0$  Hz, 3H), 1.23 (t,  $J = 7.0$  Hz, 3H);  $^{13}\text{C}$  NMR (100 MHz,  $\text{CDCl}_3$ )  $\delta$  152.1, 139.5, 138.3, 133.3, 128.4 (2C), 127.8, 127.4 (2C), 117.7, 117.1 (2C), 114.4 (3C), 79.9, 60.4, 55.6, 15.5, 14.1; MS (MALDI) calcd for  $\text{C}_{20}\text{H}_{22}\text{O}_4\text{Na}$   $[\text{M} + \text{Na}]^+$  349.14, found 349.20.

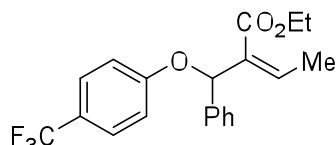**1q**

Yield: 97%; clear oil; IR (film)  $\nu_{\max}$  2979, 2916, 2845, 1716, 1614, 1515, 1324, 1241, 1110, 1067  $\text{cm}^{-1}$ ;  $^1\text{H}$  NMR (400 MHz,  $\text{CDCl}_3$ )  $\delta$  7.47 (d,  $J = 9.0$  Hz, 2H), 7.39–7.30 (m, 5H), 6.97 (d,  $J = 9.0$  Hz, 2H), 6.17 (q,  $J = 7.0$  Hz, 1H), 6.16 (s, 1H), 4.22 (q,  $J = 7.0$  Hz, 2H), 2.02 (d,  $J = 7.0$  Hz, 3H), 1.23 (t,  $J = 7.0$  Hz, 3H);  $^{13}\text{C}$  NMR (100 MHz,  $\text{CDCl}_3$ )  $\delta$  166.3, 160.1, 139.0, 138.3, 132.5, 128.5 (3C), 128.1, 127.1 (3C), 126.7, 126.6, 115.6 (2C), 79.0, 60.5, 15.5, 14.0;  $^{19}\text{F}$  NMR (376 MHz,  $\text{CDCl}_3$ )  $\delta$  -62.36; MS (MALDI) calcd for  $\text{C}_{20}\text{H}_{19}\text{O}_3\text{F}_3\text{Na}$   $[\text{M} + \text{Na}]^+$  387.11, found 387.13.

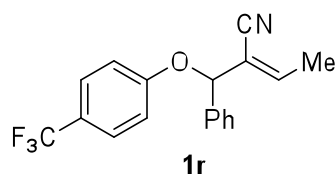

Yield: 88%; clear oil; IR (film)  $\nu_{\max}$  3068, 3035, 2916, 2222, 1614, 1515, 1328, 1243, 1111, 1068  $\text{cm}^{-1}$ ;  $^1\text{H}$  NMR (400 MHz,  $\text{CDCl}_3$ )  $\delta$  7.50 (d,  $J = 9.0$  Hz, 2H), 7.42–7.36 (m, 5H), 6.97 (d,  $J = 9.0$  Hz, 2H), 6.53 (dq,  $J = 1.0, 7.0$  Hz, 1H), 5.76 (s, 1H), 2.05 (dd,  $J = 1.0, 7.0$  Hz, 3H);  $^{13}\text{C}$  NMR (100 MHz,  $\text{CDCl}_3$ )  $\delta$  159.3, 145.0, 136.6, 129.13, 129.10, 127.0, 126.97, 126.94, 126.5 (2C), 117.45, 117.43, 117.0, 116.1 (2C), 115.3, 79.8, 17.1;  $^{19}\text{F}$  NMR (376 MHz,  $\text{CDCl}_3$ )  $\delta$  –62.42; MS (MALDI) calcd for  $\text{C}_{18}\text{H}_{14}\text{OF}_3\text{Na}$   $[\text{M} + \text{Na}]^+$  340.09, found 340.13.

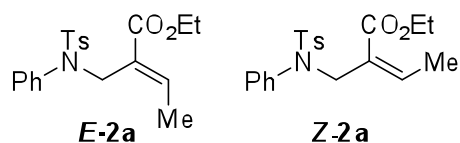

Yield: 94%; 5:2 E:Z selectivity; clear oil; IR (film)  $\nu_{\max}$  2980, 2933, 1712, 1351, 1258, 1165, 1093  $\text{cm}^{-1}$ ;  $^1\text{H}$  NMR (400 MHz,  $\text{CDCl}_3$ ), major:  $\delta$  7.47 (d,  $J = 6.0$  Hz, 2H), 7.25–7.21 (m, 5H), 7.00–6.94 (m, 3H), 4.50 (s, 2H), 4.00 (q,  $J = 7.0$  Hz, 2H), 2.42 (s, 3H), 1.88 (d,  $J = 7.0$  Hz, 3H), 1.12 (t,  $J = 7.0$  Hz, 3H); minor:  $\delta$  7.49 (d,  $J = 6.0$  Hz, 2H), 7.25–7.21 (m, 5H), 7.00–6.94 (m, 2H), 6.26 (q,  $J = 7.0$  Hz, 1H), 4.38 (s, 2H), 4.11 (q,  $J = 7.0$  Hz, 2H), 2.41 (s, 3H), 1.92 (d,  $J = 7.0$  Hz, 3H), 1.22 (t,  $J = 7.0$  Hz, 3H);  $^{13}\text{C}$  NMR (100 MHz,  $\text{CDCl}_3$ )  $\delta$  166.6, 166.3, 143.9, 143.47, 143.41, 141.3, 139.3, 138.6, 135.5, 134.7, 129.39 (4C), 129.09 (2C), 129.09 (2C), 128.87 (2C), 128.58 (2C), 127.9 (4C), 127.82, 127.73, 127.65, 127.64, 60.63, 60.36, 53.4, 45.3, 30.9, 21.5, 15.6, 14.7, 14.1, 14.0; MS (MALDI) calcd for  $\text{C}_{20}\text{H}_{23}\text{O}_4\text{NSNa}$   $[\text{M} + \text{Na}]^+$  396.12, found 396.68.

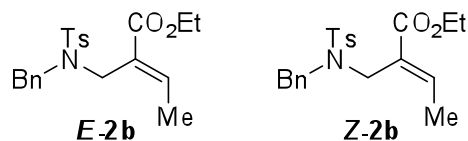

Yield: 94%; 5:2 E:Z selectivity; clear oil; IR (film)  $\nu_{\max}$  3030, 2980, 2929, 1701, 1340, 1159, 1095  $\text{cm}^{-1}$ ;  $^1\text{H}$  NMR (400 MHz,  $\text{CDCl}_3$ ), major:  $\delta$  7.67 (d,  $J = 5.0$  Hz, 2H), 7.30–7.19 (m, 7H), 6.77 (q,  $J = 7.0$  Hz, 1H), 4.35 (s, 2H), 4.07 (s, 2H), 3.96 (q,  $J = 7.0$  Hz, 2H), 2.47 (s, 3H), 1.81 (d,  $J = 7.0$  Hz, 3H), 1.15 (t,  $J = 7.0$  Hz, 3H); minor:  $\delta$  7.69 (d,  $J = 5.0$  Hz, 2H), 7.30–7.19 (m,

7H), 6.13 (q,  $J = 7.0$  Hz, 1H), 4.38 (s, 2H), 4.02 (q,  $J = 7.0$  Hz, 2H), 3.96 (s, 2H), 2.43 (s, 3H), 1.85 (d,  $J = 7.0$  Hz, 3H), 1.20 (t,  $J = 7.0$  Hz, 3H);  $^{13}\text{C}$  NMR (100 MHz,  $\text{CDCl}_3$ )  $\delta$  166.7, 166.4, 144.1, 143.13, 143.10, 141.5, 137.3, 136.2, 129.59 (2C), 129.56 (2C), 128.45 (2C), 128.41 (2C), 128.1 (2C), 127.8 (2C), 127.6, 127.5, 127.3, 127.2 (4C), 127.1, 60.5, 60.3, 52.5, 50.1, 43.8, 21.5, 15.6, 14.6, 14.1; MS (MALDI) calcd for  $\text{C}_{21}\text{H}_{25}\text{O}_4\text{NSNa}$   $[\text{M} + \text{Na}]^+$  410.14, found 410.81.

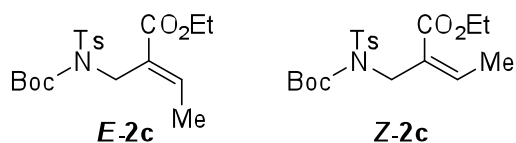

Yield: 83%; 2:1 E:Z selectivity; clear oil; IR (film)  $\nu_{\text{max}}$  2981, 2930, 1732, 1359, 1282, 1257, 1167, 1150, 1089  $\text{cm}^{-1}$ ;  $^1\text{H}$  NMR (400 MHz,  $\text{CDCl}_3$ ), major:  $\delta$  7.77 (d,  $J = 9.0$  Hz, 2H), 7.28 (d,  $J = 9.0$  Hz, 2H), 7.26 (q,  $J = 7.0$  Hz, 1H), 4.64 (s, 2H), 4.18 (q,  $J = 7.0$  Hz, 2H), 2.42 (s, 3H), 2.04 (d,  $J = 7.0$  Hz, 3H), 1.32 (s, 9H), 1.26 (t,  $J = 7.0$  Hz, 3H); minor:  $\delta$  7.72 (d,  $J = 9.0$  Hz, 2H), 7.24 (d,  $J = 9.0$  Hz, 2H), 7.06 (q,  $J = 7.0$  Hz, 1H), 4.76 (s, 2H), 4.07 (q,  $J = 7.0$  Hz, 2H), 2.40 (s, 3H), 2.96 (d,  $J = 7.0$  Hz, 3H), 1.36 (s, 9H), 1.14 (t,  $J = 7.0$  Hz, 3H);  $^{13}\text{C}$  NMR (100 MHz,  $\text{CDCl}_3$ )  $\delta$  166.3, 150.7, 144.2, 143.8, 142.3, 138.7, 137.4, 137.2, 129.1 (2C), 129.0 (2C), 128.8 (2C), 128.08 (2C), 128.02 (2C), 127.9 (2C), 84.3, 84.2, 60.4, 60.3, 48.4, 41.9, 27.85 (3C), 27.82 (3C), 21.59, 21.55, 15.5, 14.3, 14.1, 14.0; MS (MALDI) calcd for  $\text{C}_{19}\text{H}_{27}\text{O}_6\text{NSNa}$   $[\text{M} + \text{Na}]^+$  420.14, found 420.20.

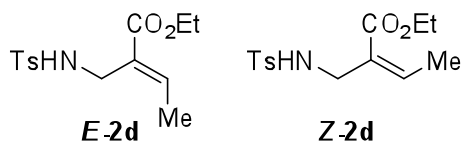

Yield: 53%; 1:1.75 E:Z selectivity; clear oil; IR (film)  $\nu_{\text{max}}$  3288, 2982, 2917, 1717, 1328, 1287, 1228, 1160, 1093  $\text{cm}^{-1}$ ;  $^1\text{H}$  NMR (400 MHz,  $\text{CDCl}_3$ ), major:  $\delta$  7.69 (d,  $J = 8.0$  Hz, 2H), 7.27 (d,  $J = 8.0$  Hz, 2H), 6.24 (q,  $J = 7.0$  Hz, 1H), 5.01 (t,  $J = 7.0$  Hz, 1H), 4.14 (q,  $J = 7.0$  Hz, 2H), 3.73 (d,  $J = 6.0$  Hz, 2H), 2.41 (s, 3H), 1.90 (d,  $J = 7.0$  Hz, 3H), 1.25 (t,  $J = 6.0$  Hz, 3H); minor:  $\delta$  7.71 (d,  $J = 8.0$  Hz, 2H), 7.27 (d,  $J = 8.0$  Hz, 2H), 6.87 (q,  $J = 7.0$  Hz, 1H), 5.14 (t,  $J = 7.0$  Hz, 1H), 4.12 (q,  $J = 7.0$  Hz, 2H), 3.81 (d,  $J = 6.0$  Hz, 2H), 2.41 (s, 3H), 1.83 (d,  $J = 7.0$  Hz, 3H), 1.23 (t,  $J = 6.0$  Hz, 3H);  $^{13}\text{C}$  NMR (100 MHz,  $\text{CDCl}_3$ )  $\delta$  166.2, 143.1, 142.8, 141.5, 137.5, 129.5 (4C), 127.3 (2C), 126.9 (2C), 126.9 (4C), 60.6, 60.4, 47.3, 38.9, 21.3, 15.6, 14.2, 14.05, 14.02; MS (MALDI) calcd for  $\text{C}_{14}\text{H}_{19}\text{O}_4\text{NSNa}$   $[\text{M} + \text{Na}]^+$  320.09, found 320.25.

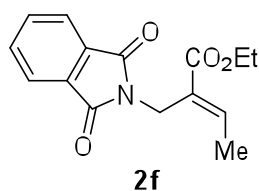

Yield: 71%; clear oil; IR (film)  $\nu_{\max}$  2981, 2916, 2848, 1771, 1716, 1396, 1256, 1056  $\text{cm}^{-1}$ ;  $^1\text{H}$  NMR (400 MHz,  $\text{CDCl}_3$ )  $\delta$  7.81 (dd,  $J = 3.0, 6.0$  Hz, 2H), 7.69 (dd,  $J = 3.0, 6.0$  Hz, 2H), 7.13 (q,  $J = 7.0$  Hz, 1H), 4.56 (s, 2H), 4.15 (q,  $J = 7.0$  Hz, 2H), 2.04 (d,  $J = 7.0$  Hz, 3H), 1.22 (t,  $J = 7.0$  Hz, 3H);  $^{13}\text{C}$  NMR (100 MHz,  $\text{CDCl}_3$ )  $\delta$  167.7 (2C), 166.3, 143.0, 133.8 (2C), 132.1 (2C), 127.2, 123.1 (2C), 60.7, 33.8, 14.6, 14.1; MS (MALDI) calcd for  $\text{C}_{15}\text{H}_{15}\text{O}_4\text{NNa}$   $[\text{M} + \text{Na}]^+$  296.09, found 296.13.

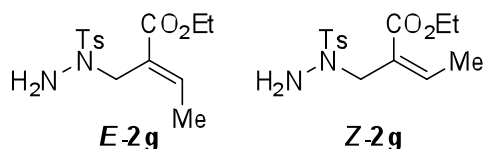

Yield: 57%; 1.5:1 E:Z selectivity; clear oil; IR (film)  $\nu_{\max}$  2918, 2849, 1716, 1317, 1272, 1177, 1136, 1086  $\text{cm}^{-1}$ ;  $^1\text{H}$  NMR (400 MHz,  $\text{CDCl}_3$ ), major:  $\delta$  7.73 (d,  $J = 8.0$  Hz, 2H), 7.31 (d,  $J = 8.0$  Hz, 2H), 7.22 (q,  $J = 7.0$  Hz, 1H), 4.23 (s, 2H), 3.95 (q,  $J = 7.0$  Hz, 2H), 2.43 (s, 3H), 1.83 (d,  $J = 7.0$  Hz, 3H), 1.13 (t,  $J = 7.0$  Hz, 3H); minor:  $\delta$  7.70 (d,  $J = 8.0$  Hz, 2H), 7.30 (d,  $J = 8.0$  Hz, 2H), 6.28 (q,  $J = 7.0$  Hz, 1H), 4.05 (s, 2H), 3.99 (q,  $J = 7.0$  Hz, 2H), 2.43 (s, 3H), 2.07 (d,  $J = 7.0$  Hz, 3H), 1.17 (t,  $J = 7.0$  Hz, 3H);  $^{13}\text{C}$  NMR (100 MHz,  $\text{CDCl}_3$ )  $\delta$  165.4, 165.1, 147.7, 146.1, 144.6, 144.5, 135.8, 135.8, 135.4, 129.5 (2C), 129.4 (2C), 128.66 (2C), 128.62 (2C), 122.0, 121.2, 60.9, 60.6, 60.2, 53.6, 29.5, 21.5, 16.3, 15.2, 13.9; MS (MALDI) calcd for  $\text{C}_7\text{H}_{15}\text{O}_2\text{N}_2$   $[\text{M} + \text{H} - \text{Ts}]^+$  159.11, found 158.98.

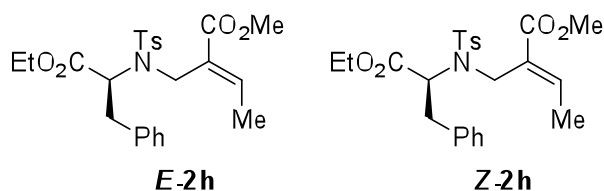

Yield: 92%; 1:1.2 E:Z selectivity; clear oil; IR (film)  $\nu_{\max}$  3030, 2982, 2952, 1742, 1717, 1346, 1257, 1222, 1156, 1093, 1031  $\text{cm}^{-1}$ ;  $^1\text{H}$  NMR (400 MHz,  $\text{CDCl}_3$ ), major:  $\delta$  7.36 (d,  $J = 8.0$  Hz, 2H), 7.27–7.16 (m, 7H), 6.25 (q,  $J = 7.0$  Hz, 1H), 4.76 (dd,  $J = 8.0, 6.0$  Hz, 2H), 4.16 (d,  $J = 7.0$  Hz, 2H), 4.06 (dq,  $J = 3.0, 7.0$  Hz, 2H), 3.43 (s, 3H), 2.99 (dd,  $J = 8.0, 6.0$  Hz, 1H), 2.91 (dd,  $J =$

8.0, 6.0 Hz, 1H), 2.40 (s, 3H), 1.85 (d,  $J = 7.0$  Hz, 3H), 1.27 (t,  $J = 7.0$  Hz, 3H); minor:  $\delta$  7.63 (d,  $J = 8.0$  Hz, 2H), 7.27–7.16 (m, 7H), 6.94 (q,  $J = 7.0$  Hz, 1H), 4.65 (dd,  $J = 8.0, 6.0$  Hz, 2H), 4.24 (d,  $J = 7.0$  Hz, 2H), 4.16 (q,  $J = 7.0$  Hz, 2H), 3.53 (s, 3H), 3.40 (dd,  $J = 8.0, 6.0$  Hz, 1H), 3.26 (dd,  $J = 8.0, 6.0$  Hz, 1H), 2.40 (s, 3H), 1.91 (d,  $J = 7.0$  Hz, 3H), 1.22 (t,  $J = 7.0$  Hz, 3H);  $^{13}\text{C}$  NMR (100 MHz,  $\text{CDCl}_3$ )  $\delta$  170.5 (2C), 170.4, 166.6, 166.5, 144.0, 143.4 (2C), 143.2, 141.0, 137.8, 137.5, 137.0, 136.9 (2C), 129.4 (2C), 129.2 (2C), 128.4 (2C), 128.3 (2C), 127.9 (2C), 127.7 (2C) 127.6 (4C), 126.7, 126.5, 117.6, 61.6, 61.0, 60.6, 60.4, 51.9, 47.9, 42.0, 36.5, 36.2, 21.5, 15.6, 14.6, 14.2, 14.1; MS (MALDI) calcd for  $\text{C}_{24}\text{H}_{29}\text{O}_6\text{NSNa}$   $[\text{M} + \text{Na}]^+$  482.16, found 482.47.

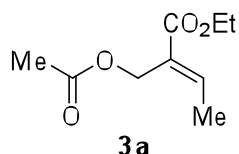

Yield: 97%; clear oil; IR (film)  $\nu_{\text{max}}$  2982, 1740, 1716, 1248, 1233, 1143, 1073, 1026  $\text{cm}^{-1}$ ;  $^1\text{H}$  NMR (400 MHz,  $\text{CDCl}_3$ )  $\delta$  7.14 (q,  $J = 7.0$  Hz, 1H), 4.86 (s, 2H), 4.22 (q,  $J = 7.0$  Hz, 2H), 2.04 (s, 3H), 1.93 (d,  $J = 7.0$  Hz, 3H), 1.29 (t,  $J = 7.0$  Hz, 3H);  $^{13}\text{C}$  NMR (100 MHz,  $\text{CDCl}_3$ )  $\delta$  170.7, 166.2, 144.0, 128.2, 60.6, 57.7, 20.7, 14.4, 14.1; MS (MALDI) calcd for  $\text{C}_9\text{H}_{14}\text{O}_4\text{Na}$   $[\text{M} + \text{Na}]^+$  209.07, found 209.05.

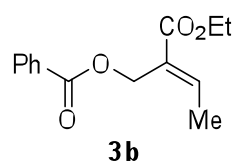

Yield: 95%; clear oil; IR (film)  $\nu_{\text{max}}$  2981, 2925, 1718, 1270, 1109, 1069  $\text{cm}^{-1}$ ;  $^1\text{H}$  NMR (400 MHz,  $\text{CDCl}_3$ )  $\delta$  8.00 (d,  $J = 8.0$  Hz, 2H), 7.52 (t,  $J = 8.0$  Hz, 1H), 7.40 (t,  $J = 8.0$  Hz, 2H), 7.19 (q,  $J = 7.0$  Hz, 1H), 5.11 (s, 2H), 4.22 (q,  $J = 7.0$  Hz, 2H), 1.98 (d,  $J = 7.0$  Hz, 3H), 1.27 (t,  $J = 7.0$  Hz, 3H);  $^{13}\text{C}$  NMR (100 MHz,  $\text{CDCl}_3$ )  $\delta$  166.2, 144.2 (2C), 132.8, 130.0, 129.5 (2C), 128.2 (3C), 60.6, 58.1, 14.5, 14.1; MS (MALDI) calcd for  $\text{C}_{14}\text{H}_{16}\text{O}_4\text{Na}$   $[\text{M} + \text{Na}]^+$  271.09, found 271.14.

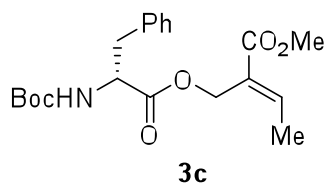

Yield: 96%; clear oil; IR (film)  $\nu_{\max}$  3368, 2978, 2932, 1712, 1497, 1366, 1284, 1250, 1169, 1072, 1020  $\text{cm}^{-1}$ ;  $^1\text{H}$  NMR (500 MHz,  $\text{CDCl}_3$ )  $\delta$  7.28–7.20 (m, 3H), 7.16 (q,  $J = 7.0$  Hz, 1H), 7.12 (d,  $J = 7.0$  Hz, 2H), 4.90 (q,  $J = 10.0$  Hz, 2H), 4.76 (dd,  $J = 184.0, 7.0$  Hz, 1H), 4.22 (q,  $J = 7.0$  Hz, 2H), 3.06 (dd,  $J = 27.0, 6.0$  Hz, 2H), 1.89 (d,  $J = 7.0$  Hz, 3H), 1.40 (s, 9H), 1.29 (t,  $J = 7.0$  Hz, 3H);  $^{13}\text{C}$  NMR (125 MHz,  $\text{CDCl}_3$ )  $\delta$  171.4, 165.9, 154.9, 144.7, 135.8, 129.2 (3C), 128.3 (2C), 127.6, 126.8, 60.7, 58.4, 54.1, 38.1, 28.1 (3C), 14.5, 14.1; MS (MALDI) calcd for  $\text{C}_{21}\text{H}_{29}\text{O}_6\text{NNa}$   $[\text{M} + \text{Na}]^+$  414.18, found 414.18.

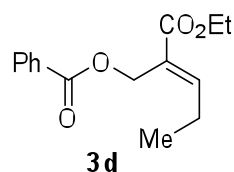

Yield: 90%; clear oil; IR (film)  $\nu_{\max}$  2975, 2935, 1716, 1267, 1234, 1109, 1069, 1025  $\text{cm}^{-1}$ ;  $^1\text{H}$  NMR (400 MHz,  $\text{CDCl}_3$ )  $\delta$  8.01 (d,  $J = 8.0$  Hz, 2H), 7.56–7.52 (m, 1H), 7.44–7.40 (m, 2H), 7.10 (t,  $J = 7.0$  Hz, 1H), 5.10 (s, 2H), 4.24 (q,  $J = 7.0$  Hz, 2H), 2.39 (quintet,  $J = 7.0$  Hz, 2H), 1.29 (t,  $J = 7.0$  Hz, 3H), 1.10 (t,  $J = 7.0$  Hz, 3H);  $^{13}\text{C}$  NMR (100 MHz,  $\text{CDCl}_3$ )  $\delta$  166.5, 166.3, 150.8, 132.2 (2C), 129.6 (3C), 128.3 (2C), 60.8, 58.5, 22.2, 14.2, 13.2; MS (MALDI) calcd for  $\text{C}_{15}\text{H}_{18}\text{O}_4\text{Na}$   $[\text{M} + \text{Na}]^+$  285.11, found 285.29.

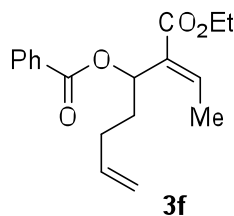

Yield: 85%; clear oil; IR (film)  $\nu_{\max}$  3072, 2979, 2916, 1720, 1716, 1450, 1262, 1104  $\text{cm}^{-1}$ ;  $^1\text{H}$  NMR (400 MHz,  $\text{CDCl}_3$ )  $\delta$  8.06–8.03 (m, 2H), 7.57–7.52 (m, 1H), 7.45–7.41 (m, 2H), 7.02 (q,  $J = 7.0$  Hz, 1H), 6.00 (dd,  $J = 7.0, 6.0$  Hz, 1H), 5.89–5.75 (m, 1H), 5.06–4.98 (m, 2H), 4.25–4.19 (m, 2H), 2.28–2.10 (m, 2H), 2.01 (d,  $J = 7.0$  Hz, 3H), 2.05–1.92 (m, 2H), 1.30 (t,  $J = 7.0$  Hz, 3H);  $^{13}\text{C}$  NMR (100 MHz,  $\text{CDCl}_3$ )  $\delta$  166.0, 165.7, 141.5, 137.4, 132.9, 131.7, 130.2, 129.6 (2C), 128.3, 115.3, 115.2, 70.4, 60.5, 32.5, 30.0, 14.6, 14.2; MS (MALDI) calcd for  $\text{C}_{18}\text{H}_{22}\text{O}_4\text{Na}$   $[\text{M} +$

$[\text{Na}]^+$  325.14, found 325.13.

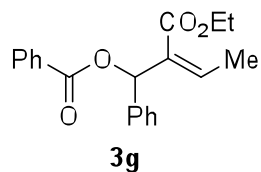

Yield: 95%; clear oil; IR (film)  $\nu_{\text{max}}$  2982, 2916, 2848, 1721, 1263, 1219, 1095  $\text{cm}^{-1}$ ;  $^1\text{H}$  NMR (400 MHz,  $\text{CDCl}_3$ )  $\delta$  8.08 (d,  $J = 8.0$  Hz, 2H), 7.56 (t,  $J = 7.0$  Hz, 1H), 7.46–7.28 (m, 8H), 6.90 (s, 1H), 6.27 (q,  $J = 7.0$  Hz, 1H), 4.15 (q,  $J = 7.0$  Hz, 2H), 2.07 (d,  $J = 7.0$  Hz, 3H), 1.18 (t,  $J = 7.0$  Hz, 3H);  $^{13}\text{C}$  NMR (100 MHz,  $\text{CDCl}_3$ )  $\delta$  165.8, 165.0, 139.0, 138.3, 132.9, 132.4, 130.0, 129.6 (2C), 128.2 (3C), 127.9 (2C), 127.3 (2C), 75.1, 60.2, 15.4, 13.9; MS (MALDI) calcd for  $\text{C}_{20}\text{H}_{20}\text{O}_4\text{Na}$   $[\text{M} + \text{Na}]^+$  347.12, found 347.80.

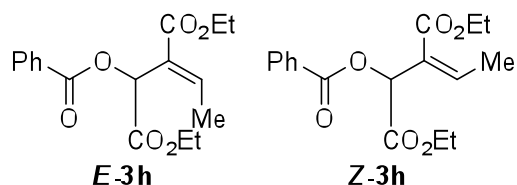

Yield: 96%; 1:1.5 E:Z selectivity; clear oil; IR (film)  $\nu_{\text{max}}$  2983, 2939, 2907, 1757, 1728, 1451, 1369, 1266, 1215, 1178, 1108, 1070, 1028  $\text{cm}^{-1}$ ;  $^1\text{H}$  NMR (400 MHz,  $\text{CDCl}_3$ ), major:  $\delta$  8.07–8.04 (m, 2H), 7.50 (t,  $J = 6.0$  Hz, 1H), 7.41 (t,  $J = 8.0$  Hz, 2H), 6.60 (q,  $J = 7.0$  Hz, 1H), 6.07 (s, 1H), 4.27–1.9 (m, 4H), 2.14 (d,  $J = 7.0$  Hz, 3H), 1.29 (t,  $J = 7.0$  Hz, 3H), 1.24 (t,  $J = 7.0$  Hz, 3H); minor:  $\delta$  8.07–8.04 (m, 2H), 7.50 (t,  $J = 6.0$  Hz, 1H), 7.41 (t,  $J = 8.0$  Hz, 2H), 7.24 (q,  $J = 7.0$  Hz, 1H), 6.48 (s, 1H), 4.27–4.19 (m, 4H), 2.04 (d,  $J = 7.0$  Hz, 3H), 1.29 (t,  $J = 7.0$  Hz, 3H), 1.23 (t,  $J = 7.0$  Hz, 3H);  $^{13}\text{C}$  NMR (100 MHz,  $\text{CDCl}_3$ )  $\delta$  168.3, 165.4, 165.2, 165.0, 145.28, 145.22, 133.34 (2C), 133.32 (2C), 129.9 (3C), 129.8 (2C), 129.48, 129.45, 128.39, 128.30 (4C), 127.6 (2C), 73.3, 66.6, 61.7, 61.0, 60.7, 15.9, 14.7, 14.19, 14.16, 14.06; MS (MALDI) calcd for  $\text{C}_{17}\text{H}_{20}\text{O}_6\text{Na}$   $[\text{M} + \text{Na}]^+$  343.11, found 343.13.

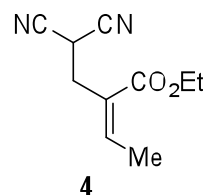

Yield: 86%; clear oil; IR (film)  $\nu_{\text{max}}$  2984, 2916, 2256, 1711, 1245  $\text{cm}^{-1}$ ;  $^1\text{H}$  NMR (400 MHz,

CDCl<sub>3</sub>)  $\delta$  6.01 (dt,  $J$  = 1.0, 7.0 Hz, 1H), 4.23 (q,  $J$  = 7.0 Hz, 2H), 4.02 (t,  $J$  = 7.0 Hz, 1H), 3.16 (dt,  $J$  = 1.0, 7.0 Hz, 2H), 2.00 (d,  $J$  = 1.0 Hz, 3H), 1.37 (t,  $J$  = 7.0 Hz, 3H); <sup>13</sup>C NMR (100 MHz, CDCl<sub>3</sub>)  $\delta$  166.5, 134.7, 131.6, 112.2 (2C), 60.9, 30.1, 21.6, 20.3, 14.0; MS (MALDI) calcd for C<sub>10</sub>H<sub>12</sub>O<sub>2</sub>N<sub>2</sub>Na [M + Na]<sup>+</sup> 215.07, found 214.99.

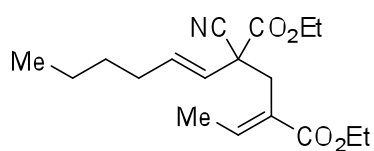**E-5a**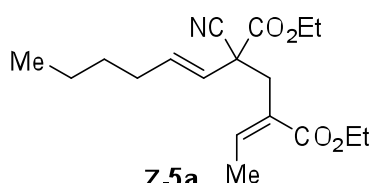**Z-5a**

Yield: 57%; 1:5 E:Z selectivity; clear oil; IR (film)  $\nu_{\max}$  2958, 2932, 2873, 2859, 2244, 1743, 1707, 1235, 1156 cm<sup>-1</sup>; <sup>1</sup>H NMR major (500 MHz, CDCl<sub>3</sub>)  $\delta$  6.24 (q,  $J$  = 5.7 Hz, 1H), 5.97 (dt,  $J$  = 12.4, 5.5 Hz, 1H), 5.45 (dt,  $J$  = 12.0, 1.1 Hz, 1H), 4.24–4.14 (m, 4H), 2.92 (dd,  $J$  = 36.0, 11.0 Hz, 2H), 2.03 (d,  $J$  = 4.0 Hz, 3H), 1.90 (d,  $J$  = 6.0 Hz, 2H), 1.36–1.23 (m, 4H), 1.30 (q,  $J$  = 5.3 Hz, 6H), 0.88 (t,  $J$  = 6.0 Hz, 3H); <sup>1</sup>H NMR minor (500 MHz, CDCl<sub>3</sub>)  $\delta$  7.11 (q,  $J$  = 5.7 Hz, 1H), 5.97 (dt,  $J$  = 12.4, 5.5 Hz, 1H), 5.53 (dt,  $J$  = 12.0, 1.1 Hz, 1H), 4.24–4.14 (m, 4H), 3.06 (dd,  $J$  = 36.0, 11.0 Hz, 2H), 2.05 (d,  $J$  = 4.0 Hz, 3H), 1.78 (d,  $J$  = 6.0 Hz, 2H), 1.36–1.23 (m, 4H), 1.26 (q,  $J$  = 5.3 Hz, 6H), 0.88 (t,  $J$  = 6.0 Hz, 3H); <sup>13</sup>C NMR (125 MHz, CDCl<sub>3</sub>)  $\delta$  167.4, 166.6, 143.2 (2C), 135.4 (2C), 126.3, 123.5, 123.2 (2C), 117.0, 77.1, 76.9, 76.6, 62.8, 62.7 (2C), 60.7, 60.4 (2C), 52.5, 41.1, 33.5, 31.6 (2C), 30.6 (2C), 22.48, 22.0, 21.9, 15.9, 15.4 (2C), 14.0, 13.8 (2C), 13.7 (2C); MS (MALDI) calcd for C<sub>18</sub>H<sub>31</sub>O<sub>4</sub>NNa [M + Na]<sup>+</sup> 344.18, found 344.18.

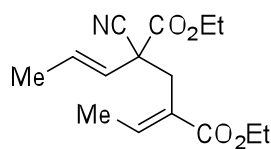**E-5b**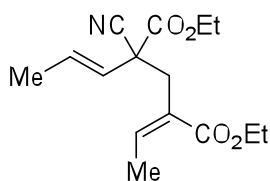**Z-5b**

Yield: 42%; 1:5 E:Z selectivity; clear oil; IR (film)  $\nu_{\max}$  2980.20, 2937.76, 2876.11, 2246.49, 1743.84, 1705.89, 1236.49, 1157.61 cm<sup>-1</sup>; <sup>1</sup>H NMR (500 MHz, CDCl<sub>3</sub>), major:  $\delta$  6.23 (q,  $J$  = 6.7 Hz, 1H), 6.00 (dt,  $J$  = 12.4, 5.1 Hz, 1H), 5.43 (d,  $J$  = 12.0, 1H), 4.26–4.11 (m, 4H), 2.95 (d,  $J$  = 12.0 Hz, 1H), 2.85 (d,  $J$  = 12.0 Hz, 1H), 2.10–2.01 (m, 3H), 2.02 (d,  $J$  = 8.0 Hz, 3H), 1.34–1.23 (m, 6H); <sup>13</sup>C NMR (125 MHz, CDCl<sub>3</sub>)  $\delta$  166.9, 166.6, 143.2, 142.7, 136.7 (2C), 135.9, 126.9, 126.3, 122.7, 122.4 (2C), 117.2, 117.0, 62.8, 62.7 (2C), 60.6, 60.4 (2C), 52.5, 51.6, 41.1 (2C),



36.5, 33.5, 25.0 (2C), 15.9 (2C), 15.3, 14.0; MS (MALDI) calcd for C<sub>16</sub>H<sub>28</sub>O<sub>4</sub>NNa [M + Na]<sup>+</sup> 316.15, found 316.15.

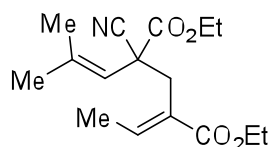**E-5c**

Yield: 26%; clear oil; IR (film)  $\nu_{\max}$  2982, 2939, 2914, 2243, 1740, 1712, 1257, 1143 cm<sup>-1</sup>; <sup>1</sup>H NMR (500 MHz, CDCl<sub>3</sub>)  $\delta$  7.13 (q,  $J$  = 5.3 Hz, 1H), 5.28 (t,  $J$  = 1.0 Hz, 1H), 4.27–4.16 (m, 4H), 3.12 (q,  $J$  = 9.3 Hz, 2H), 1.92 (d,  $J$  = 6.0 Hz, 3H), 1.82 (d,  $J$  = 4.0 Hz, 4H), 1.77 (d,  $J$  = 4.0 Hz, 3H), 1.30 (m, 6H); <sup>13</sup>C NMR (125 MHz, CDCl<sub>3</sub>)  $\delta$  168.3, 167.0, 142.9, 140.8, 127.2, 119.6, 118.2, 62.7, 60.7, 47.3, 34.4, 26.4, 19.0, 15.3, 14.0, 13.7; MS (MALDI) calcd for C<sub>16</sub>H<sub>28</sub>O<sub>4</sub>NNa [M + Na]<sup>+</sup> 316.15, found 316.15.

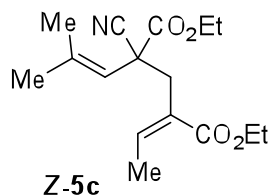**Z-5c**

Yield: 53%; clear oil; IR (film)  $\nu_{\max}$  2982, 2939, 2914, 2243, 1740, 1712, 1257, 1143 cm<sup>-1</sup>; <sup>1</sup>H NMR (500 MHz, CDCl<sub>3</sub>)  $\delta$  6.24 (q,  $J$  = 5.3 Hz, 1H), 5.15 (t,  $J$  = 1.0 Hz, 1H), 4.20 (m, 4H), 2.98 (q,  $J$  = 9.3 Hz, 2H), 2.02 (d,  $J$  = 6.0 Hz, 3H), 1.81 (d,  $J$  = 4.0 Hz, 4H), 1.75 (d,  $J$  = 4.0 Hz, 3H), 1.30 (m, 6H); <sup>13</sup>C NMR (125 MHz, CDCl<sub>3</sub>)  $\delta$  168.1, 166.6, 142.8, 141.0, 126.6, 119.0, 117.9, 62.6, 60.5, 48.1, 41.8, 26.4, 18.9, 15.9, 14.0, 13.8; MS (MALDI) calcd for C<sub>16</sub>H<sub>28</sub>O<sub>4</sub>NNa [M + Na]<sup>+</sup> 316.15, found 316.15.

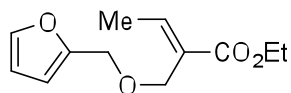**E-6a**

Yield: 44%; clear oil; IR (film)  $\nu_{\max}$  3122, 2928, 2877, 1711, 1279, 1235, 1151, 1069 cm<sup>-1</sup>; <sup>1</sup>H NMR (400 MHz, CDCl<sub>3</sub>)  $\delta$  7.38 (t,  $J$  = 11.0 Hz, 1H), 7.09 (q,  $J$  = 7.0 Hz, 1H), 6.32 (d,  $J$  = 11.0 Hz, 2H), 4.46 (s, 2H), 4.26 (s, 2H), 4.18 (q,  $J$  = 7.0 Hz, 2H), 1.86 (d,  $J$  = 7.0 Hz, 3H), 1.26 (t,  $J$  = 7.0 Hz, 3H); <sup>13</sup>C NMR (100 MHz, CDCl<sub>3</sub>)  $\delta$  166.5, 151.8, 143.1, 142.7, 129.5, 110.5, 110.2, 109.3, 64.2, 62.8, 14.6, 14.2; MS (MALDI) calcd for C<sub>12</sub>H<sub>16</sub>O<sub>4</sub>Na [M + Na]<sup>+</sup> 247.09, found

247.10.

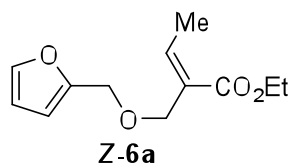

Yield: 44%; clear oil; IR (film)  $\nu_{\max}$  3122, 2981, 2907, 2862, 1717, 1257, 1235, 1151, 1095, 1067  $\text{cm}^{-1}$ ;  $^1\text{H}$  NMR (400 MHz,  $\text{CDCl}_3$ )  $\delta$  7.39 (dd,  $J = 2.0, 1.0$  Hz, 1H), 6.34–6.30 (m, 3H), 4.46 (s, 2H), 4.22 (q,  $J = 7.0$  Hz, 2H), 4.15 (t,  $J = 1.0$  Hz, 2H), 2.04 (d,  $J = 7.0$  Hz, 3H), 1.29 (t,  $J = 7.0$  Hz, 3H);  $^{13}\text{C}$  NMR (100 MHz,  $\text{CDCl}_3$ )  $\delta$  166.7, 151.7, 142.7, 140.3, 129.5, 110.2, 109.2, 70.8, 64.1, 60.2, 15.5, 14.2; MS (MALDI) calcd for  $\text{C}_{12}\text{H}_{16}\text{O}_4\text{Na}$   $[\text{M} + \text{Na}]^+$  247.09, found 247.13.

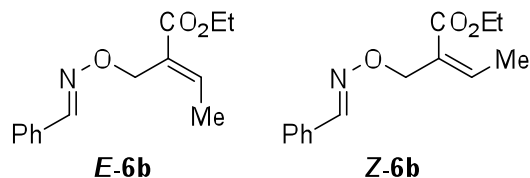

Yield: 77%; 4:1 E:Z selectivity; clear oil; IR (film)  $\nu_{\max}$  2981, 1713, 1652, 1447, 1282, 1245, 1141, 1021  $\text{cm}^{-1}$ ;  $^1\text{H}$  NMR (400 MHz,  $\text{CDCl}_3$ ), major:  $\delta$  8.05 (s, 1H), 7.57–7.53 (m, 2H), 7.38–7.33 (m, 3H), 7.19 (q,  $J = 7.0$  Hz, 1H), 4.96 (s, 2H), 4.23 (q,  $J = 7.0$  Hz, 2H), 2.02 (d,  $J = 7.0$  Hz, 3H), 1.30 (t,  $J = 7.0$  Hz, 3H); minor:  $\delta$  8.09 (s, 1H), 7.57–7.53 (m, 2H), 7.38–7.33 (m, 3H), 6.41 (q,  $J = 7.0$  Hz, 1H), 4.83 (s, 2H), 4.24 (q,  $J = 7.0$  Hz, 2H), 2.08 (d,  $J = 7.0$  Hz, 3H), 1.31 (t,  $J = 7.0$  Hz, 3H);  $^{13}\text{C}$  NMR (100 MHz,  $\text{CDCl}_3$ )  $\delta$  166.9 (2C), 148.8, 148.7, 144.1 (2C), 132.3, 129.7, 129.3, 129.1, 128.6 (4C), 127.06 (4C), 127.00, 117.7, 117.4, 67.1 (2C), 60.6 (2C), 14.8, 14.2; MS (MALDI) calcd for  $\text{C}_{14}\text{H}_{17}\text{O}_3\text{NNa}$   $[\text{M} + \text{Na}]^+$  270.11, found 270.07.

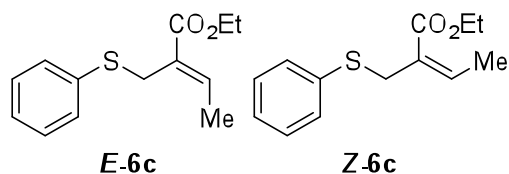

Yield: 65%; 5:1 E:Z selectivity; clear oil; IR (film)  $\nu_{\max}$  2980, 2935, 1711, 1275, 1178, 1052  $\text{cm}^{-1}$ ;  $^1\text{H}$  NMR (400 MHz,  $\text{CDCl}_3$ ) major:  $\delta$  7.46–7.41 (m, 2H), 6.34–6.30 (m, 3H), 6.92 (q,  $J = 7.0$  Hz, 2H), 4.20 (q,  $J = 7.0$  Hz, 2H), 3.80 (s, 2H), 1.57 (d,  $J = 7.0$  Hz, 3H), 1.28 (t,  $J = 7.0$  Hz, 3H); minor:  $\delta$  7.48–7.45 (m, 2H), 6.34–6.30 (m, 3H), 6.81 (q,  $J = 7.0$  Hz, 2H), 4.22 (q,  $J = 7.0$  Hz,

2H), 3.60 (d,  $J = 7.0$  Hz, 2H), 1.71 (d,  $J = 3.0$  Hz, 3H), 1.32 (t,  $J = 7.0$  Hz, 3H);  $^{13}\text{C}$  NMR (100 MHz,  $\text{CDCl}_3$ )  $\delta$  166.6, 140.1, 135.7, 130.9, 129.4 (2C), 128.9 (2C), 128.8, 126.9, 60.7, 31.2, 14.2 (2); MS (MALDI) calcd for  $\text{C}_{13}\text{H}_{16}\text{O}_2\text{SNa}$   $[\text{M} + \text{Na}]^+$  259.07, found 259.11.

### Synthesis of 3,4-Dimethylcoumarin

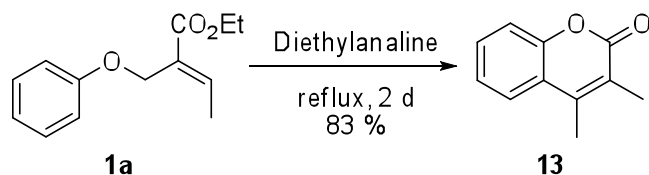

A round-bottom flask equipped with a stirrer bar and condenser was flame-dried and left to cool under Ar. Compound **1a** (0.5 mmol) and diethylaniline (1 mL) were added to the flask. The mixture was heated under reflux and left to react until compound **1a** was consumed, typically 48 h (TLC; hexane/EtOAc, 6:1). The product stained brightly in a standard permanganate stain. The crude reaction mixture was loaded directly onto a silica gel column and separated chromatographically (hexane/EtOAc, 6:1) to provide 3,4-dimethylcoumarin (**12**) in agreement with the literature<sup>3</sup> (164 mg, 83% yield) as a clear oil; IR (film)  $\nu_{\text{max}}$  2917, 2849, 1715, 1695, 1615, 1604, 1455, 1385, 1288, 1220, 1086  $\text{cm}^{-1}$ ;  $^1\text{H}$  NMR (400 MHz,  $\text{CDCl}_3$ )  $\delta$  7.62–7.60 (m, 1H), 7.46–7.45 (m, 1H), 7.32–7.26 (m, 2H), 2.42 (s, 3H), 2.23 (s, 3H);  $^{13}\text{C}$  NMR (100 MHz,  $\text{CDCl}_3$ )  $\delta$  161.9, 151.9, 145.8, 130.2, 124.1, 123.9, 122.1, 120.4, 116.6, 14.9, 13.3; MS (MALDI) calcd for  $\text{C}_{11}\text{H}_{10}\text{O}_2\text{Na}$   $[\text{M} + \text{Na}]^+$  197.05, found 197.05.

<sup>3</sup> Dittmer, D.; Li, Q; Avilov, D. *J. Org. Chem.* **2005**, *70*, 4882–4686.

Allenes

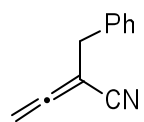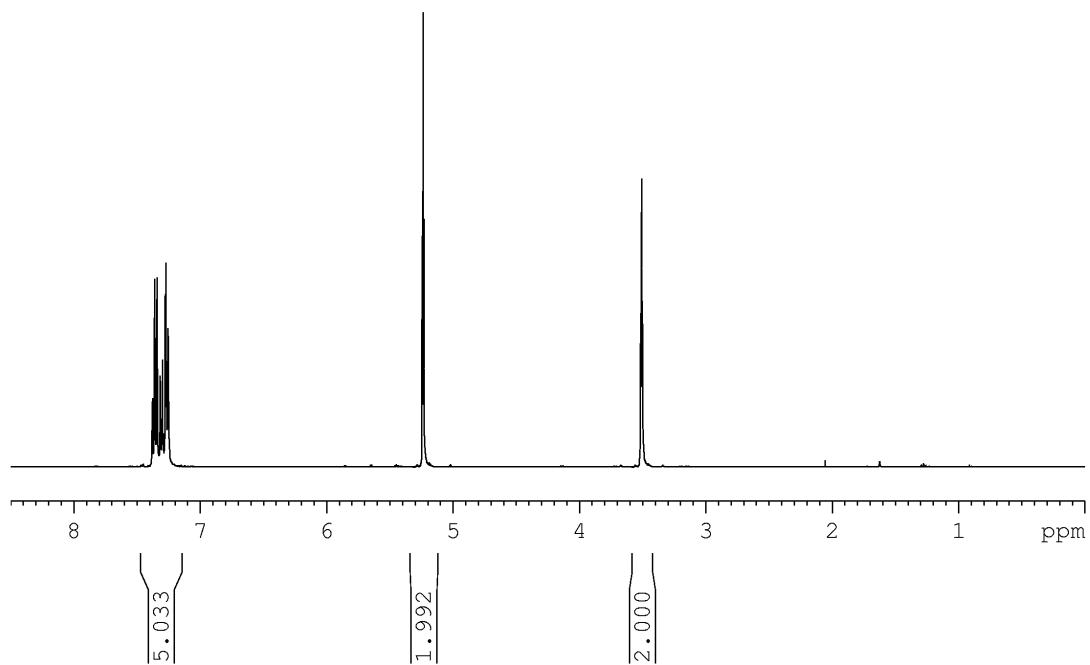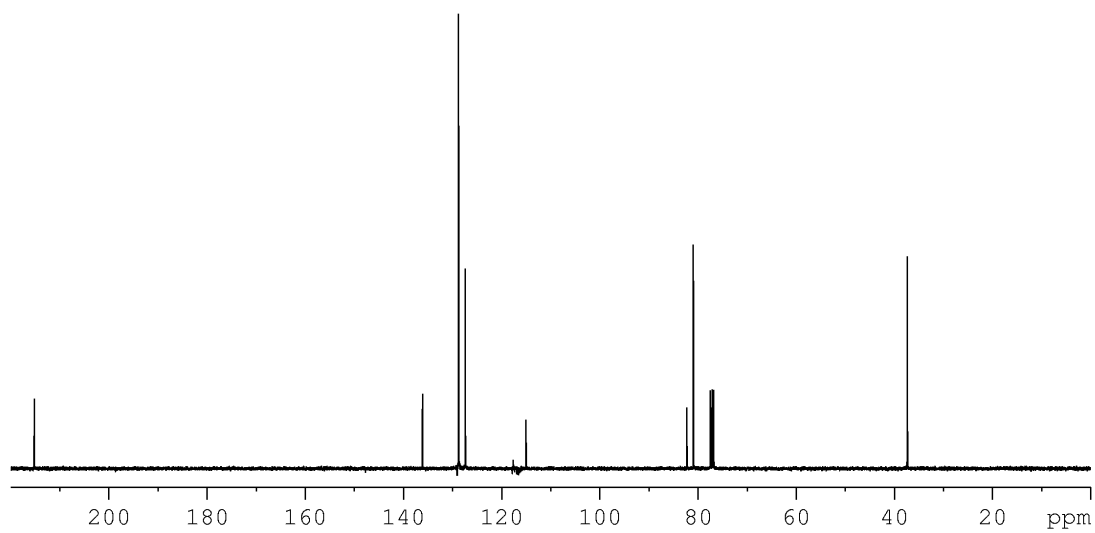

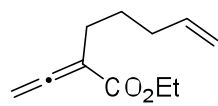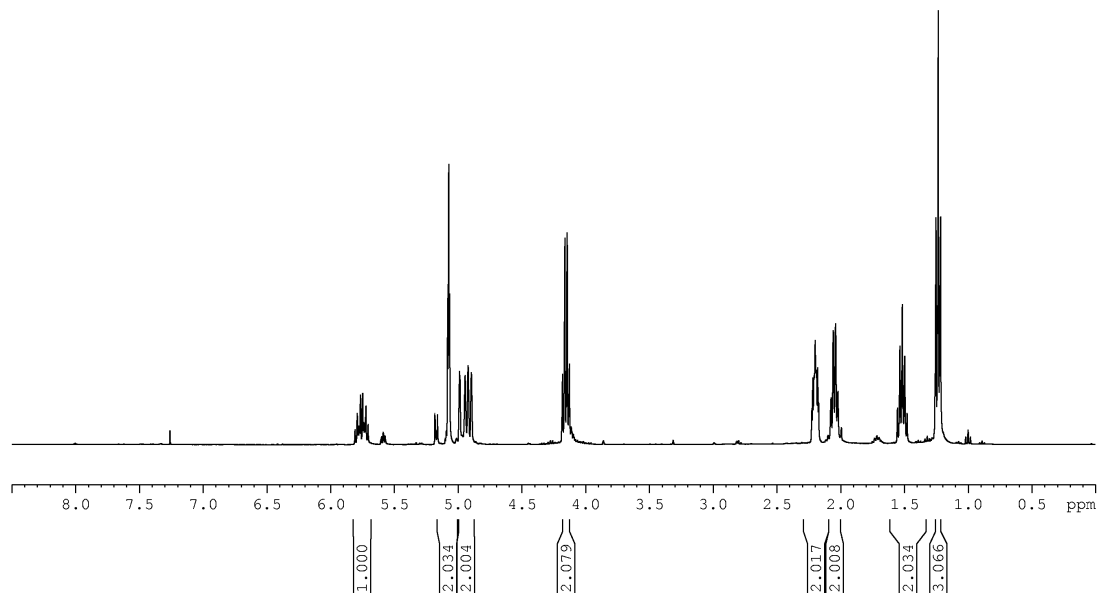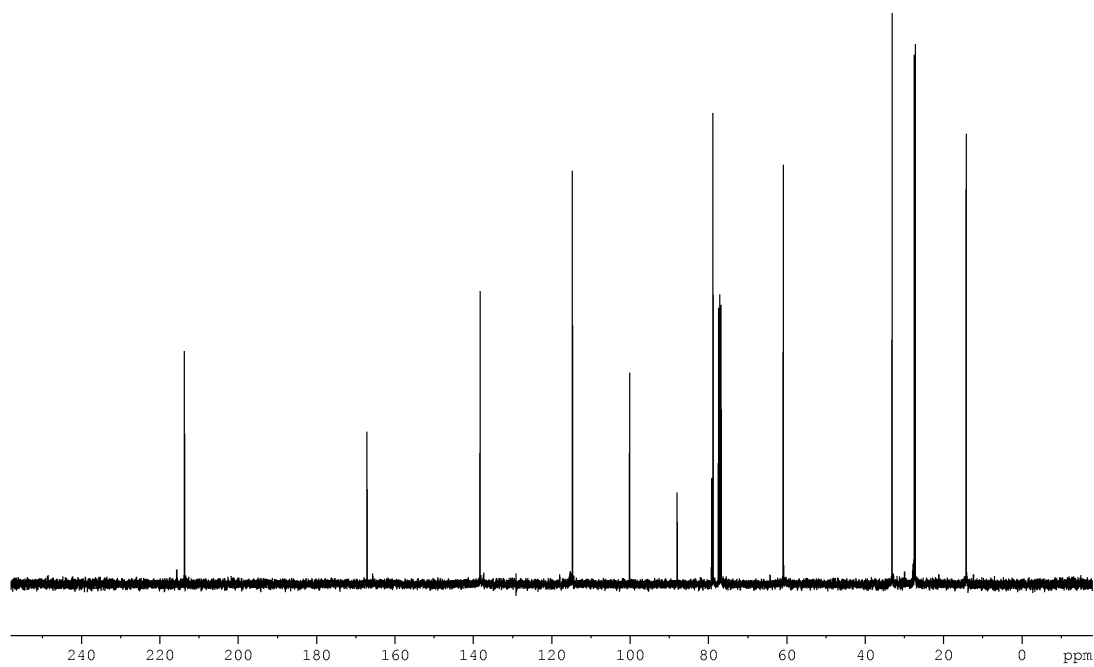

***$\beta'$ -Umpolung Addition Products***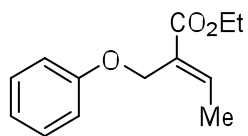**1a**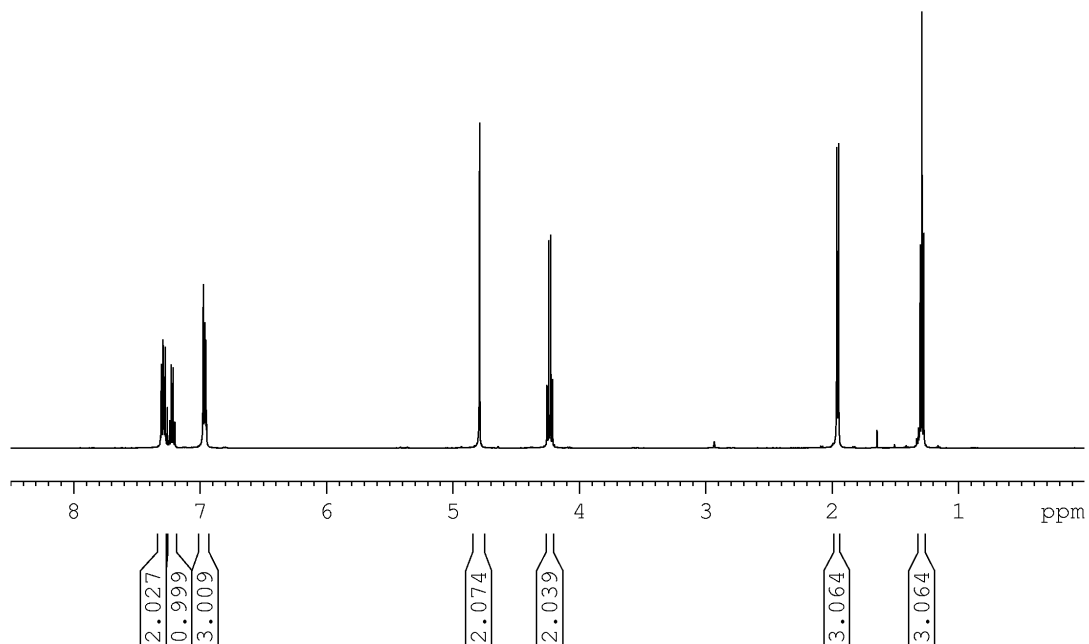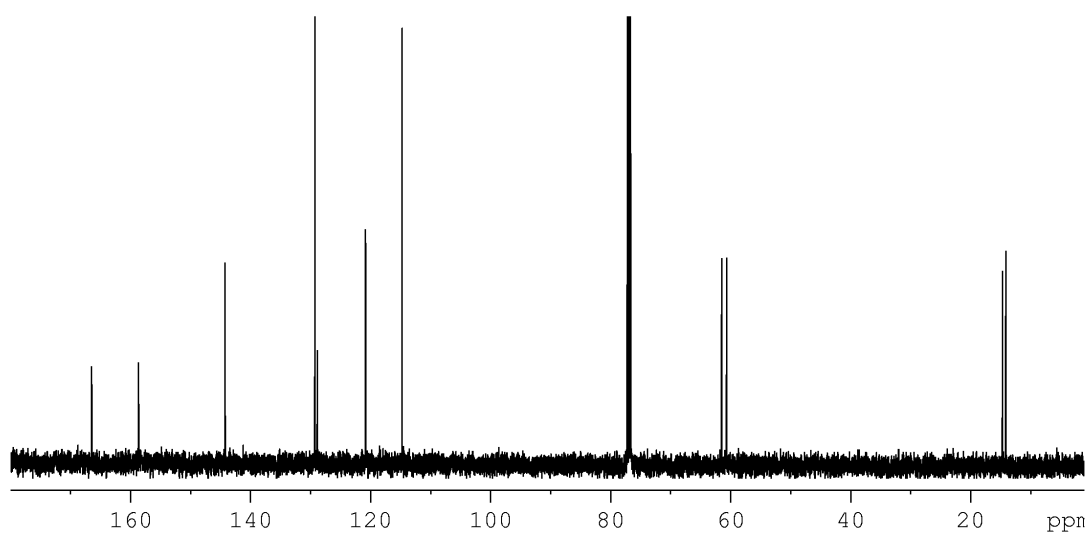

**Compound 1a NOESY**

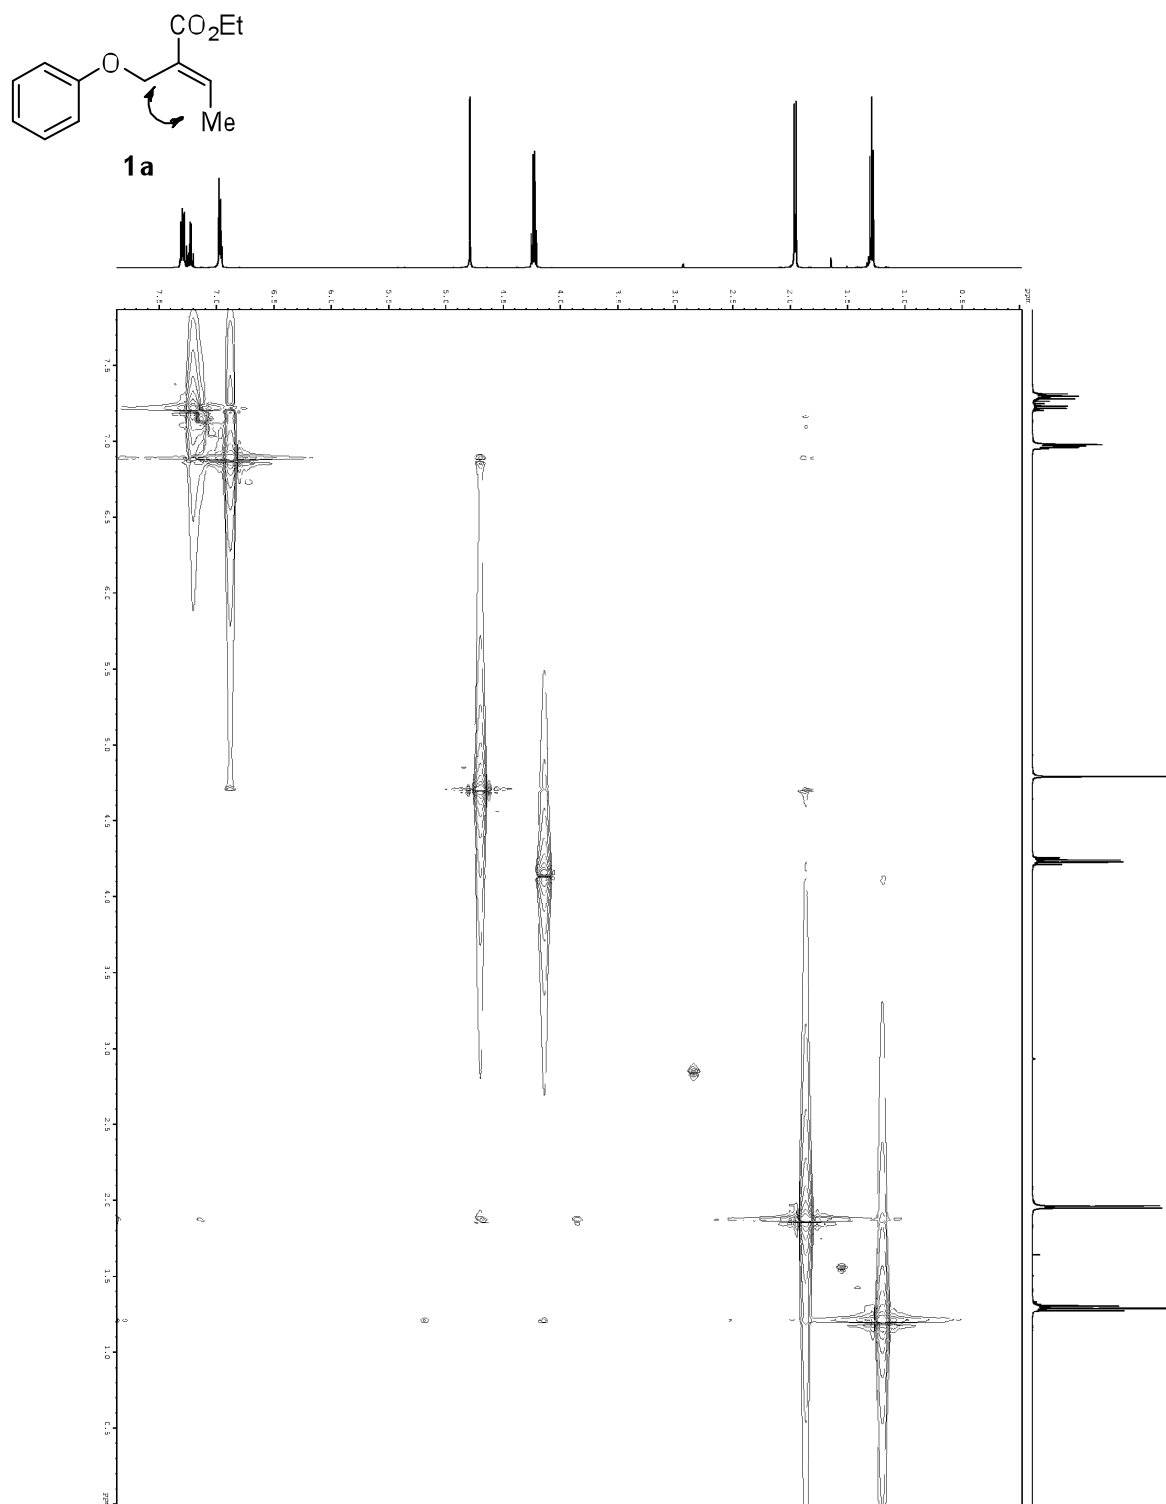

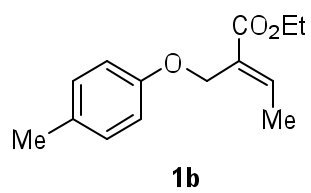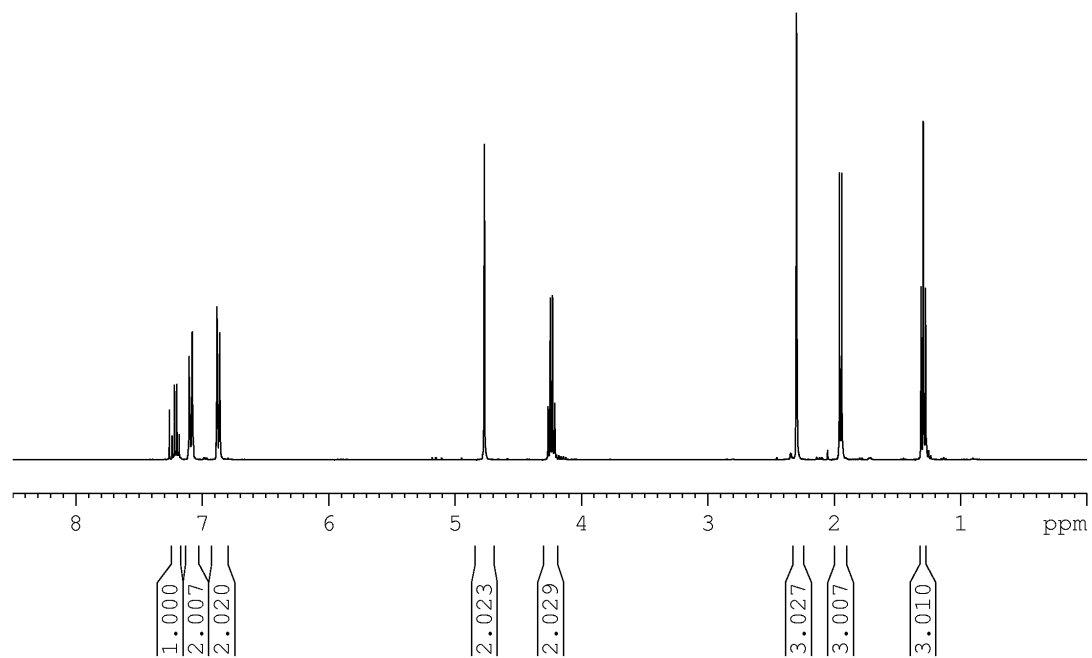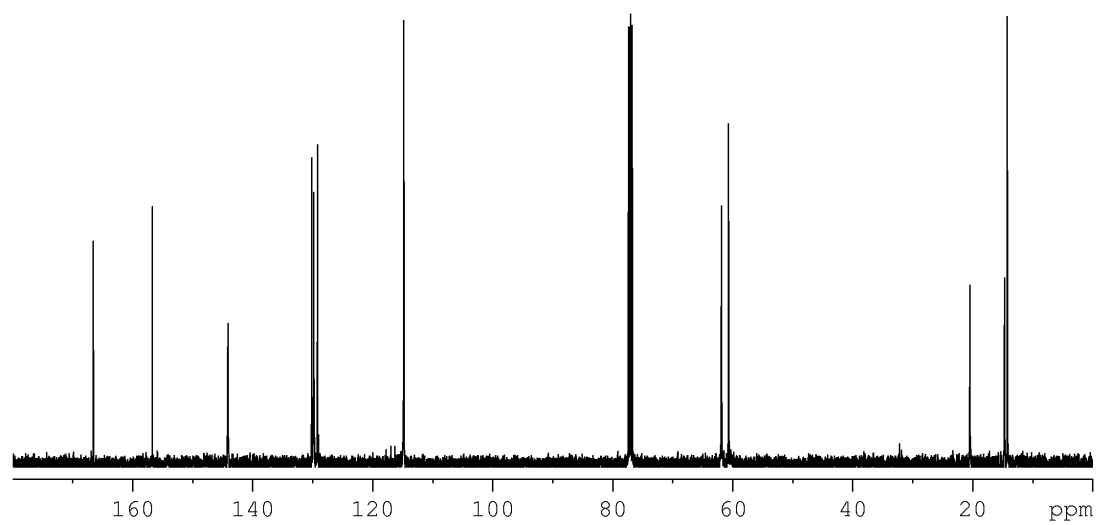



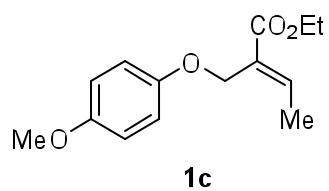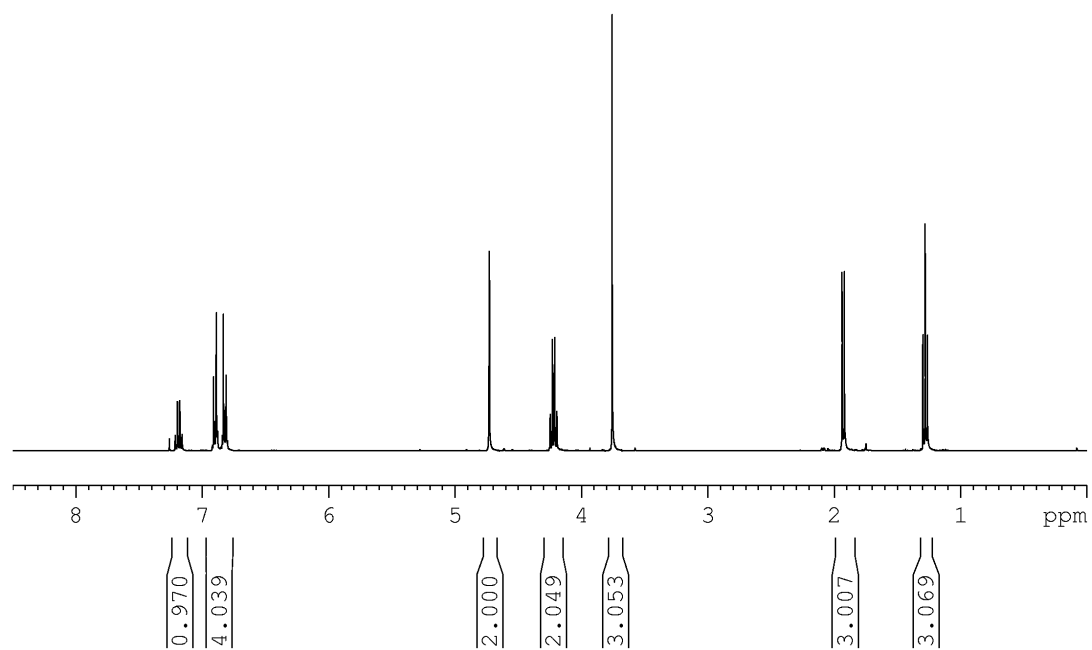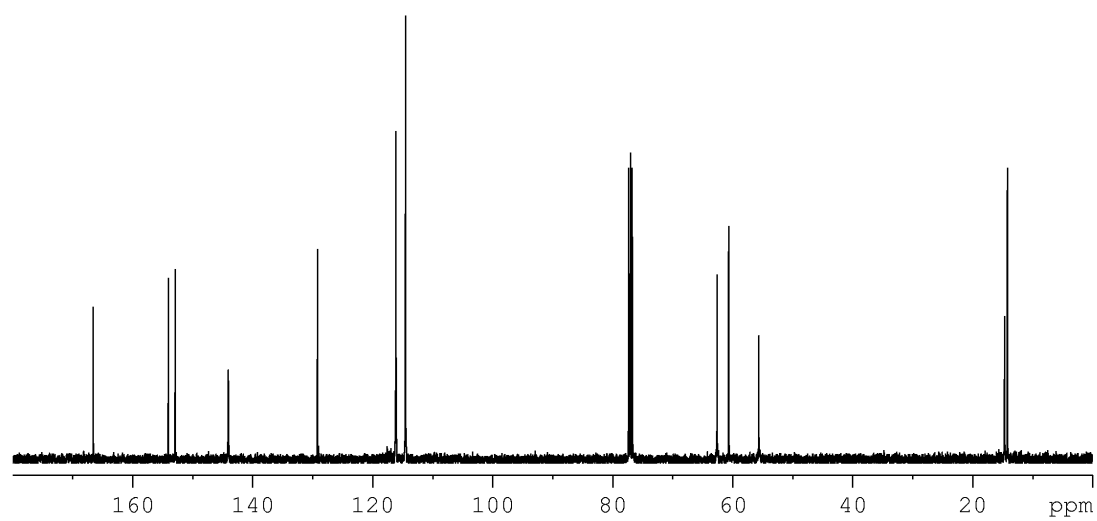

**Compound 1c NOESY**

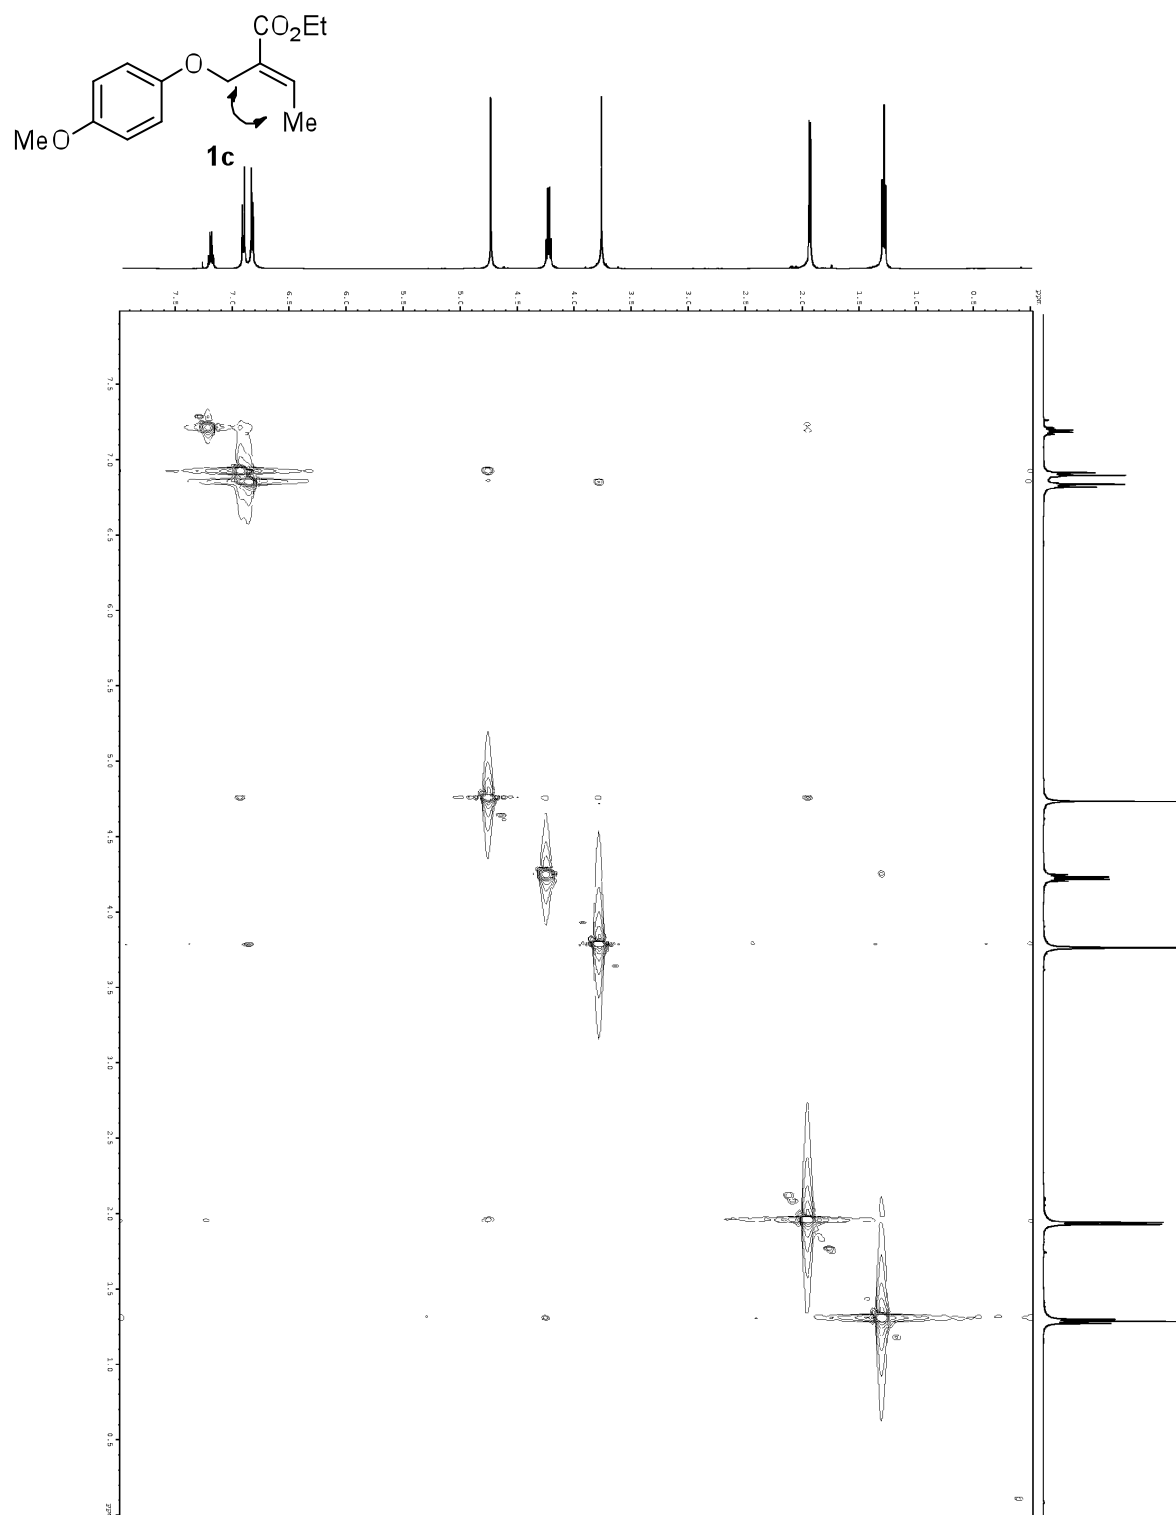

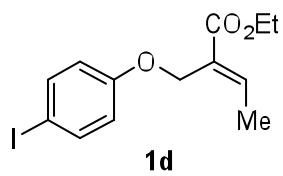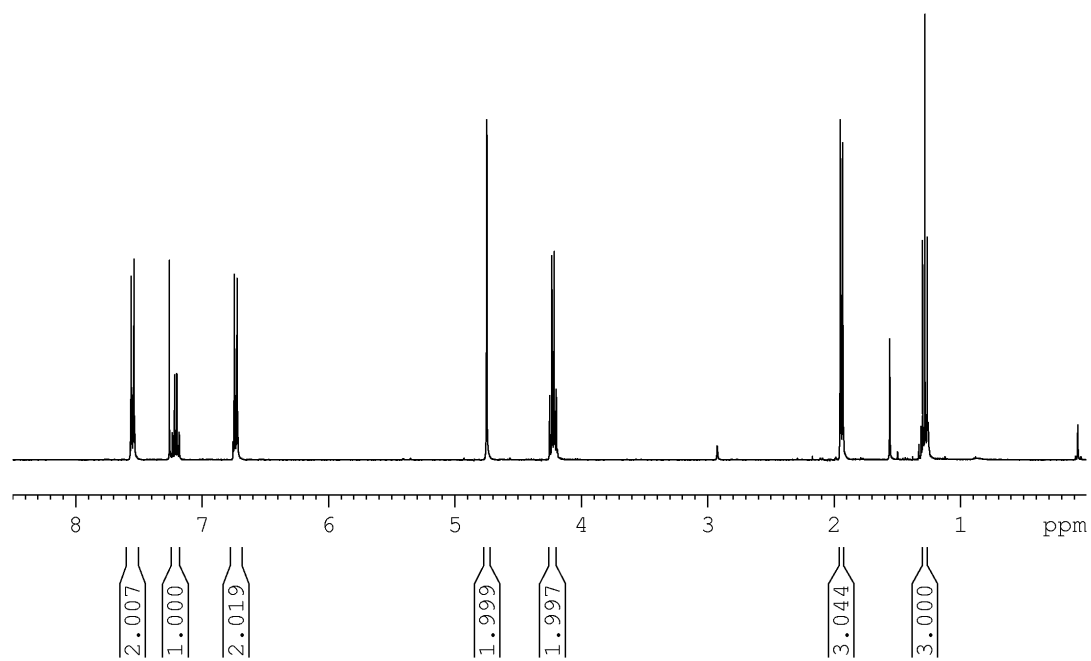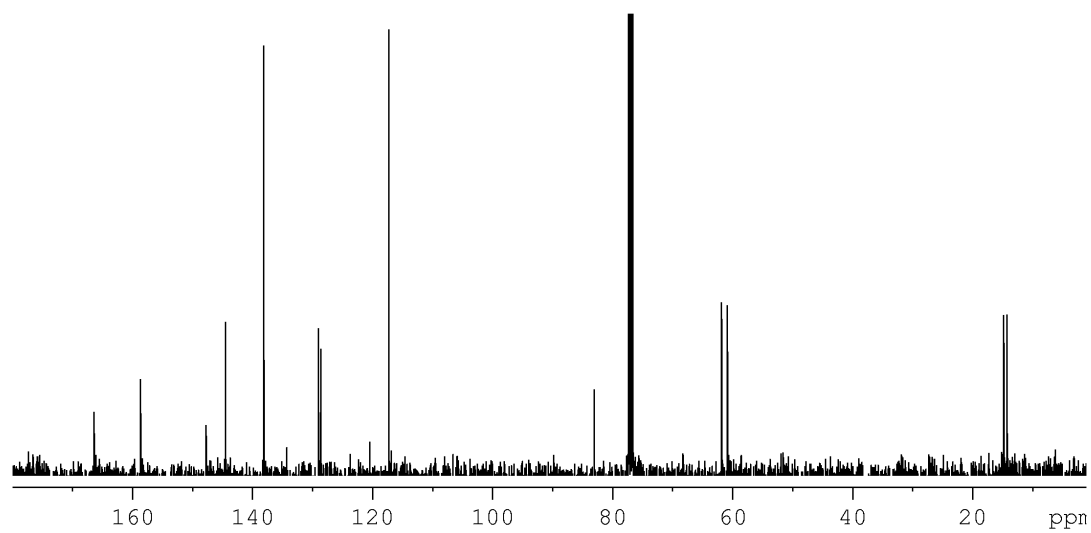

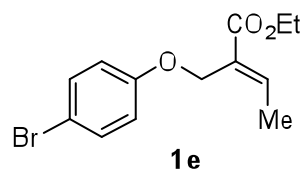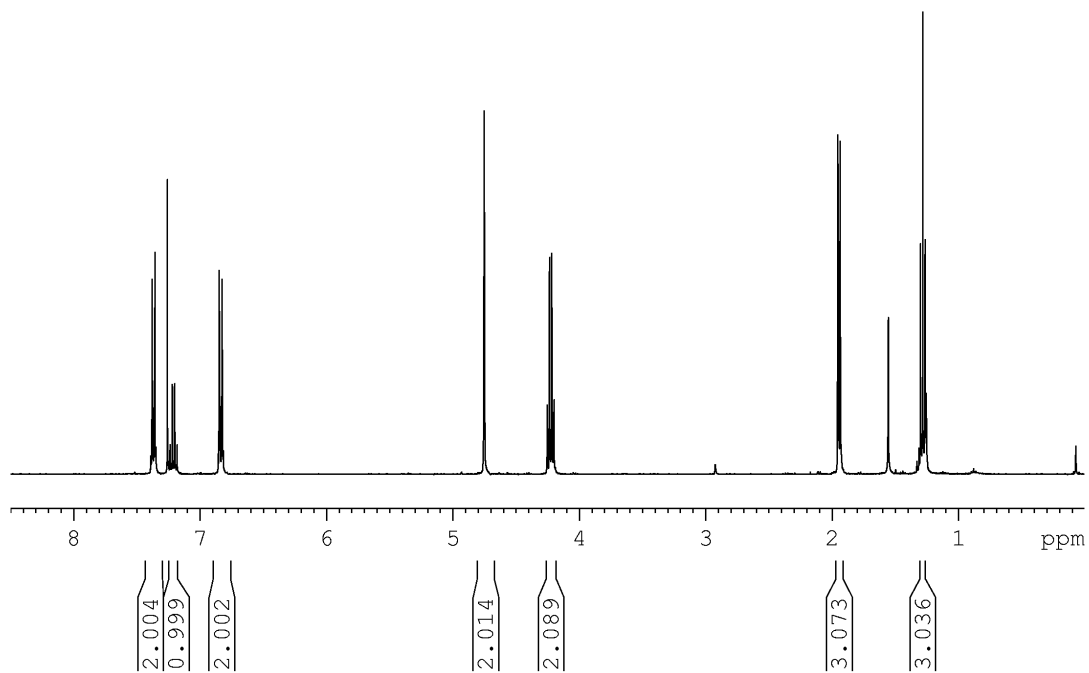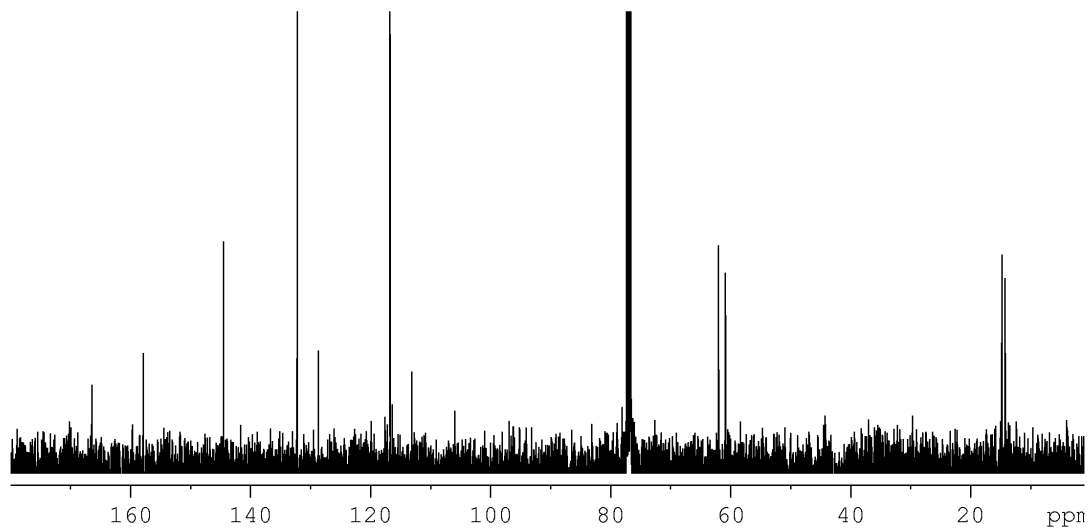

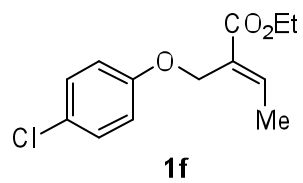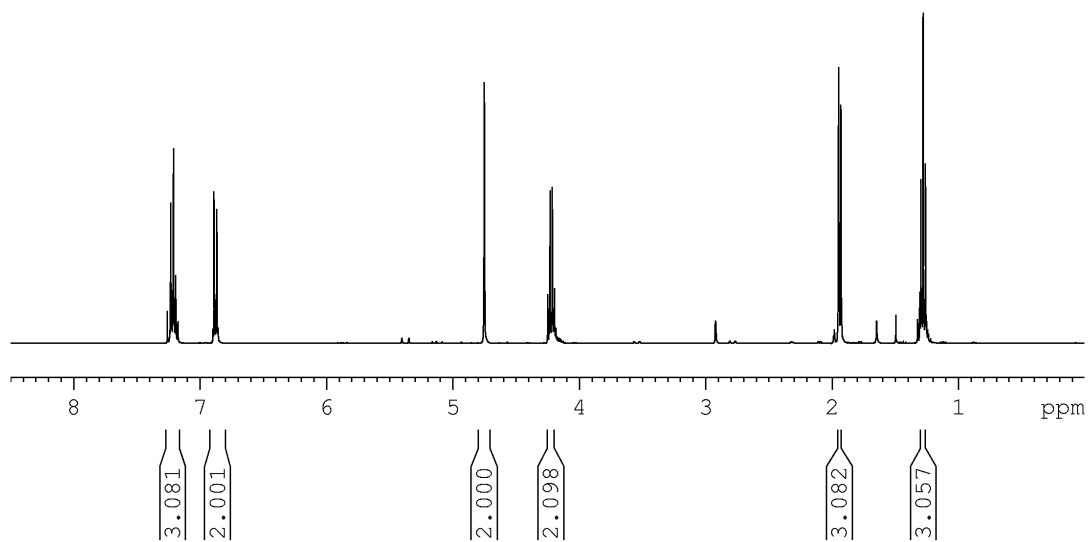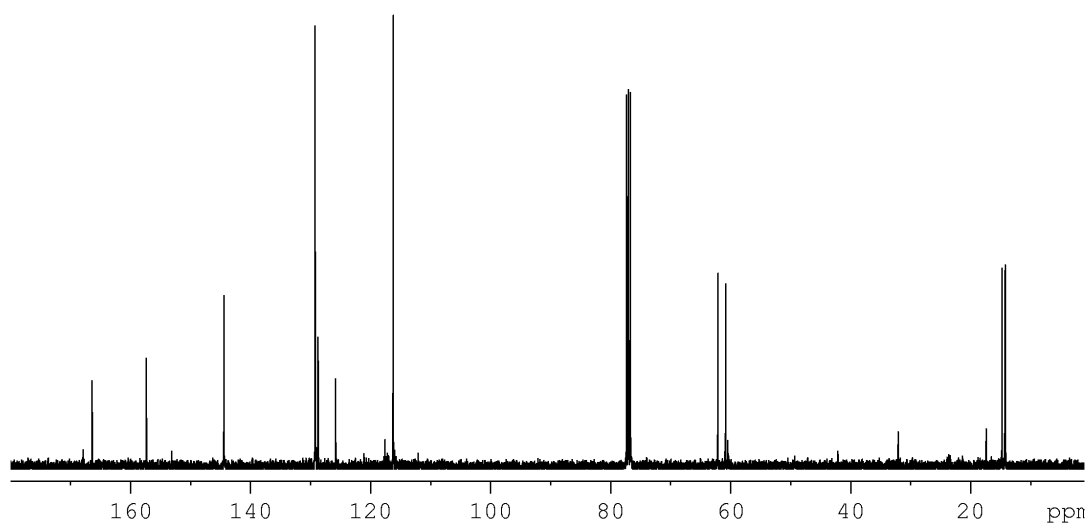

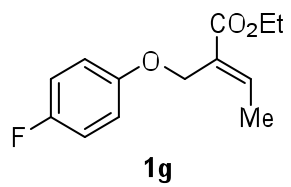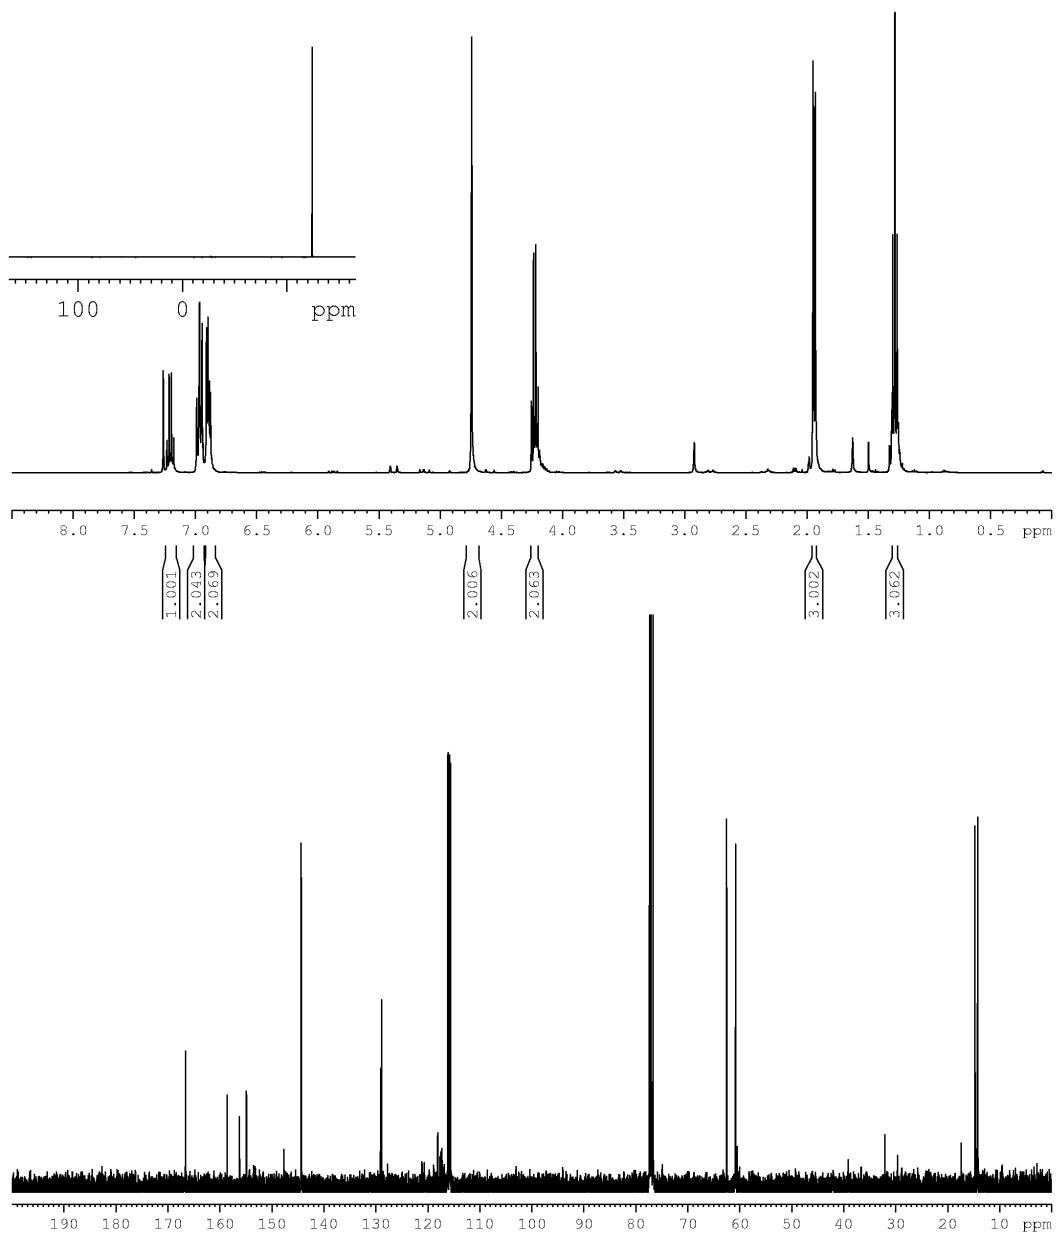

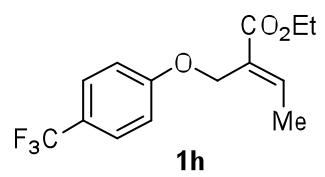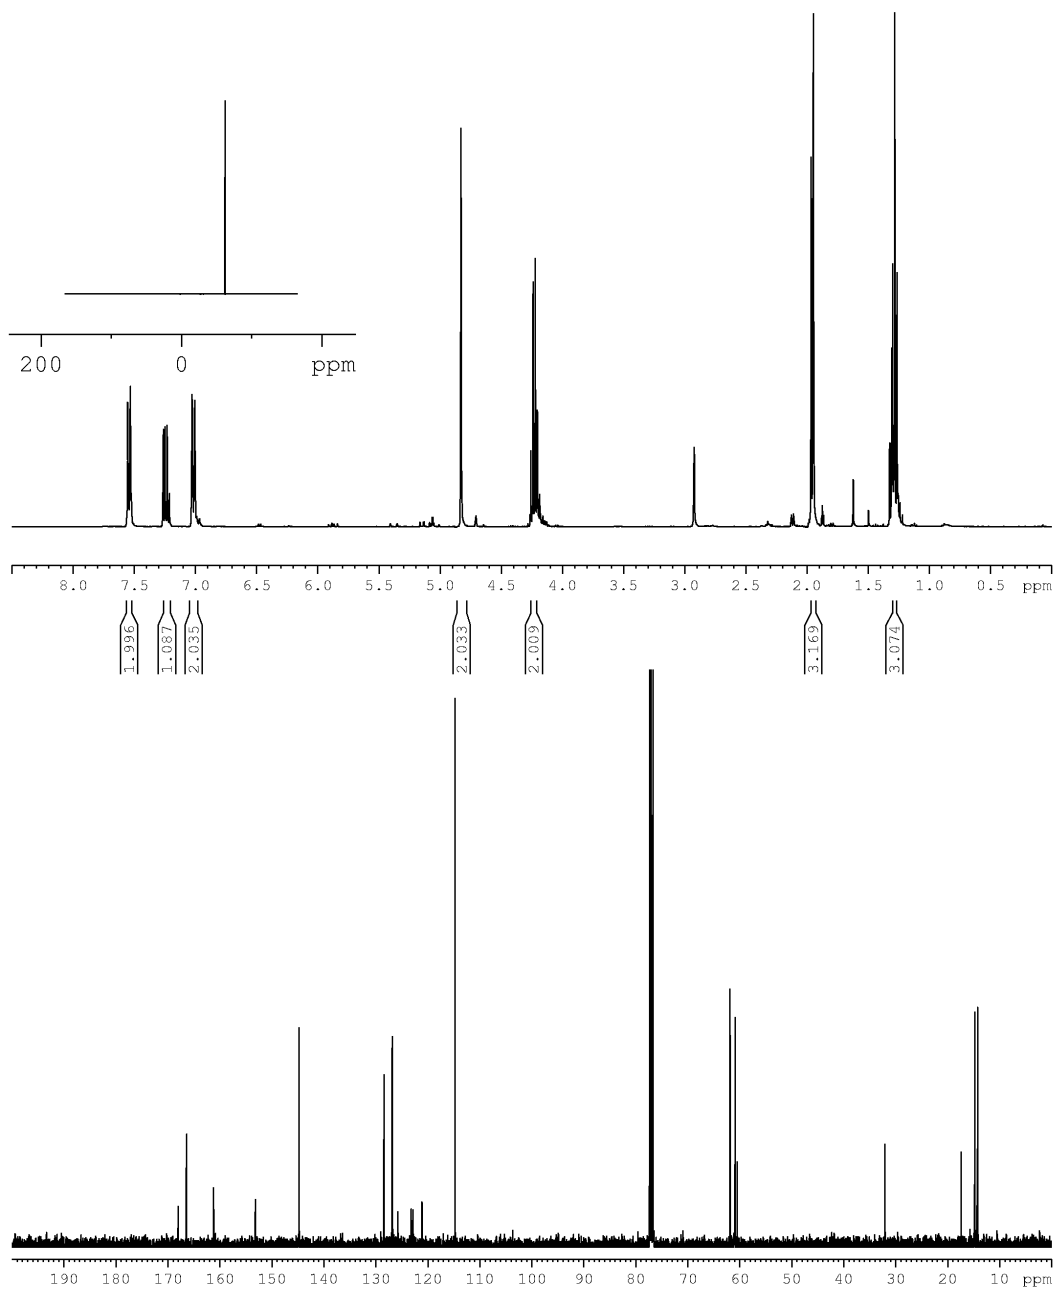

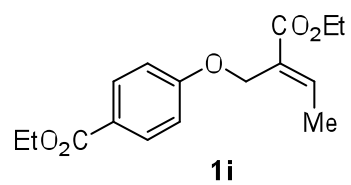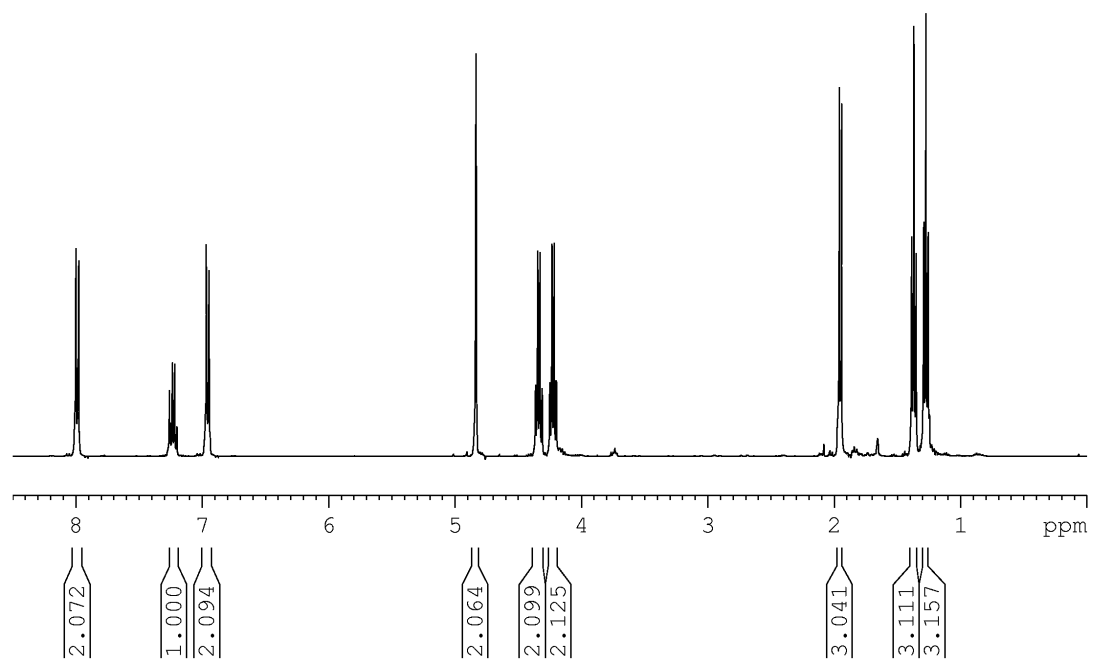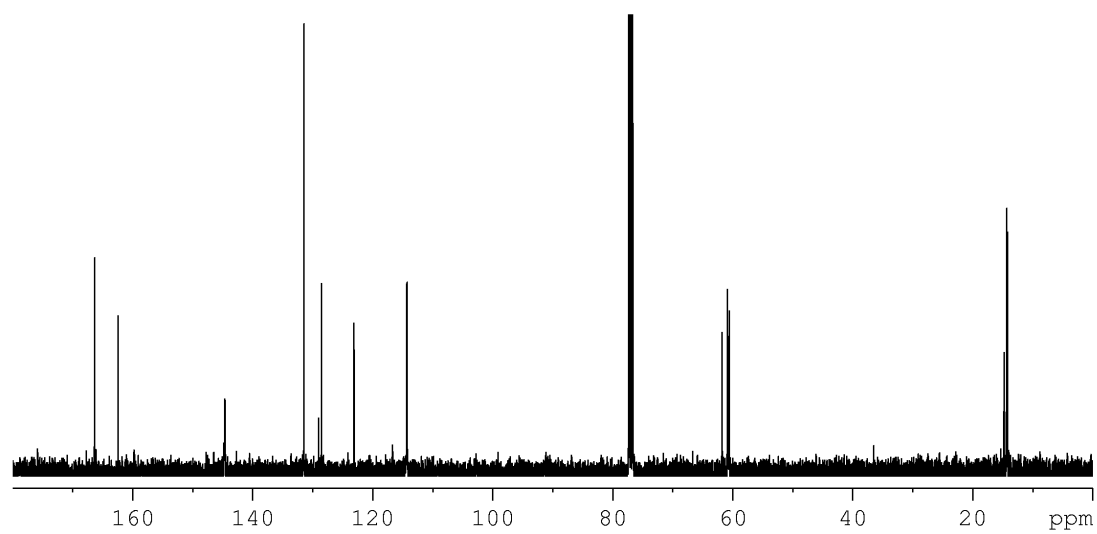



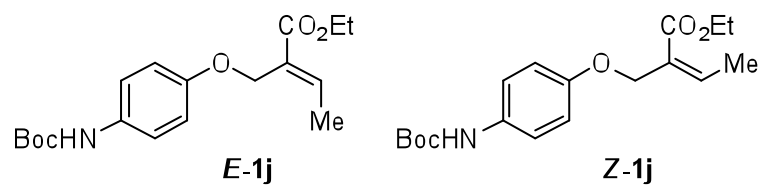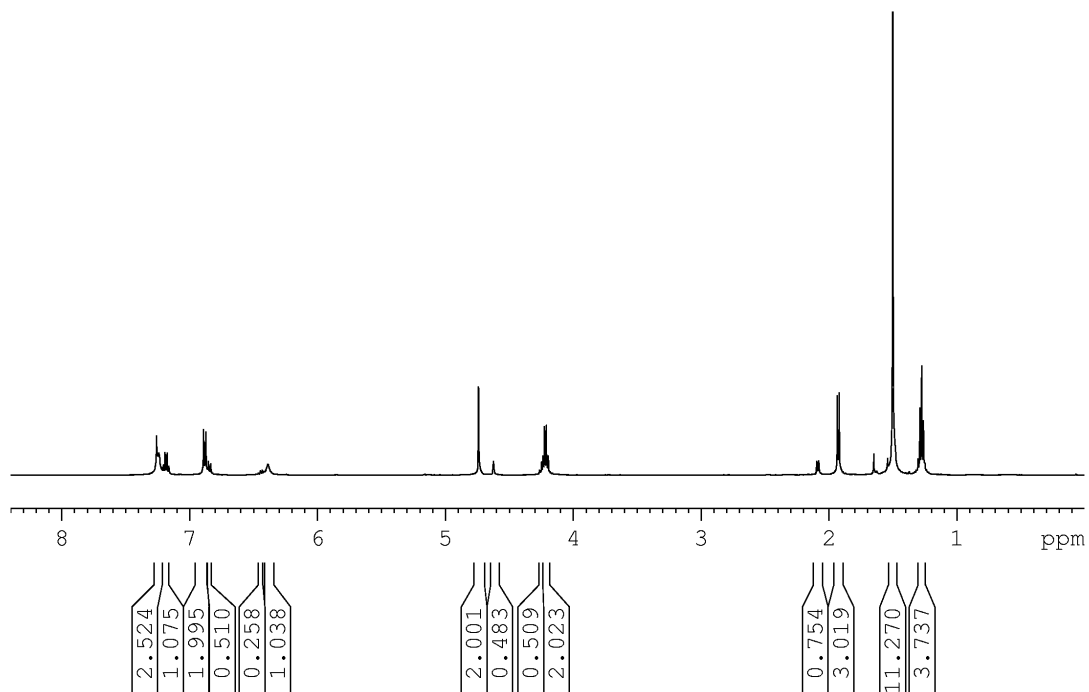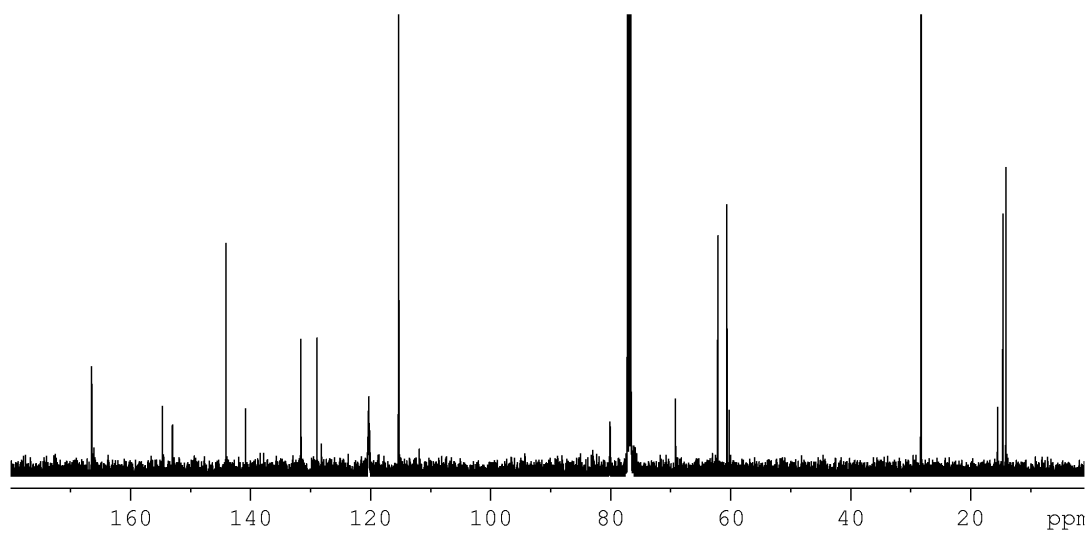

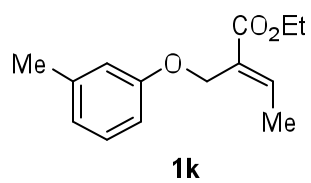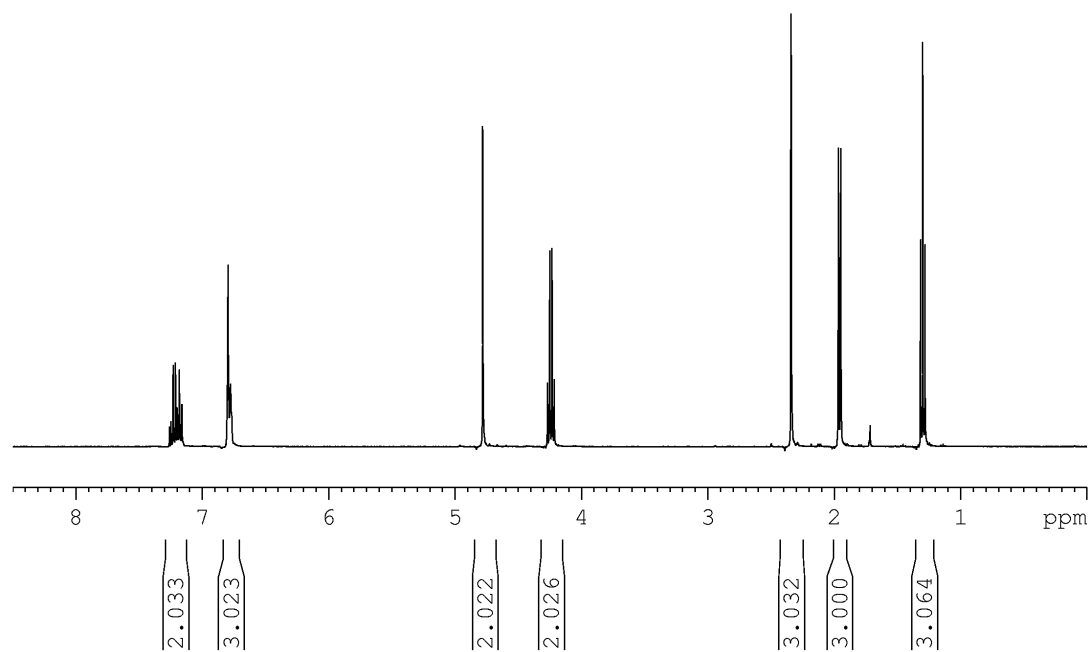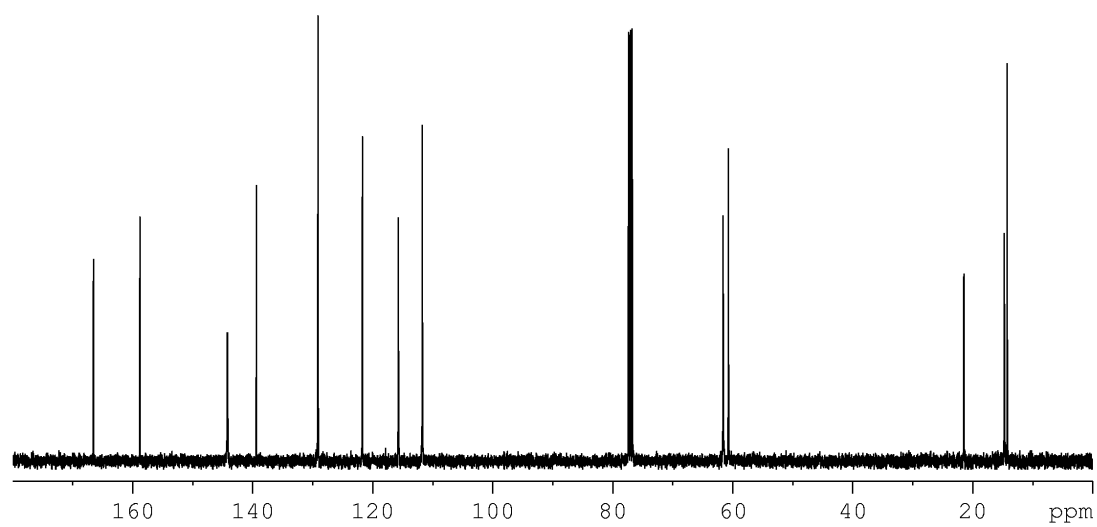

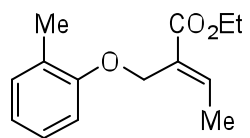

**11**

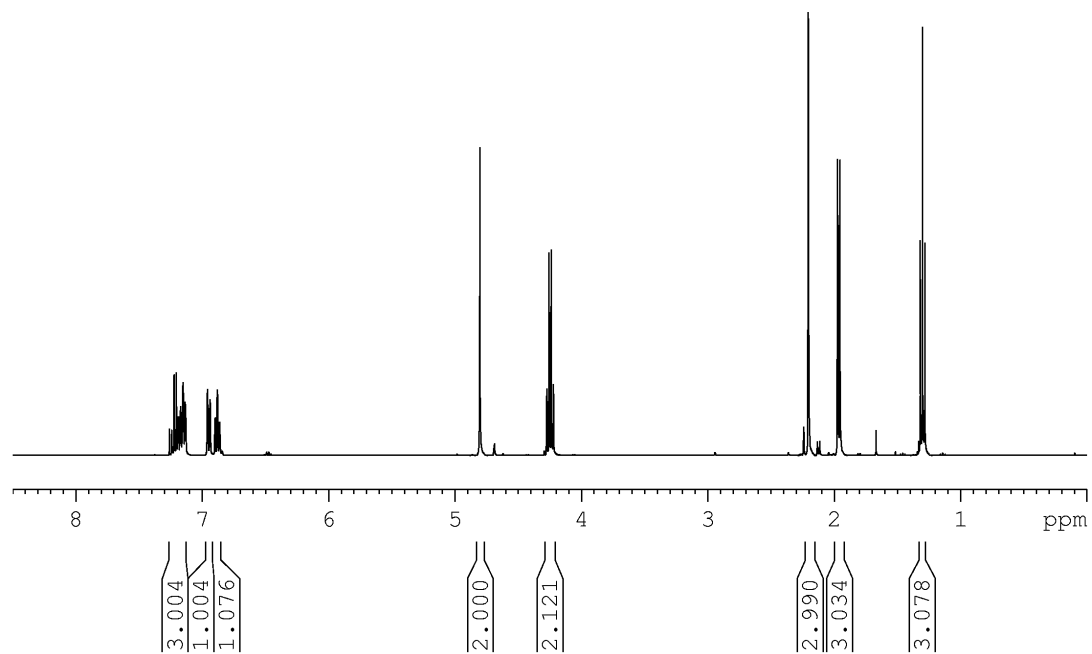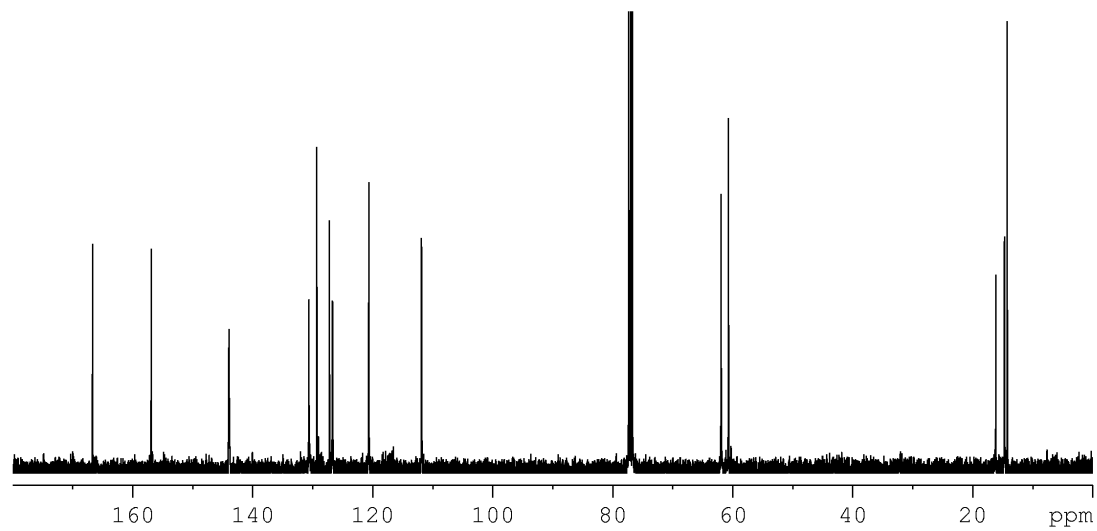

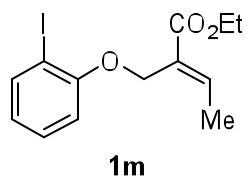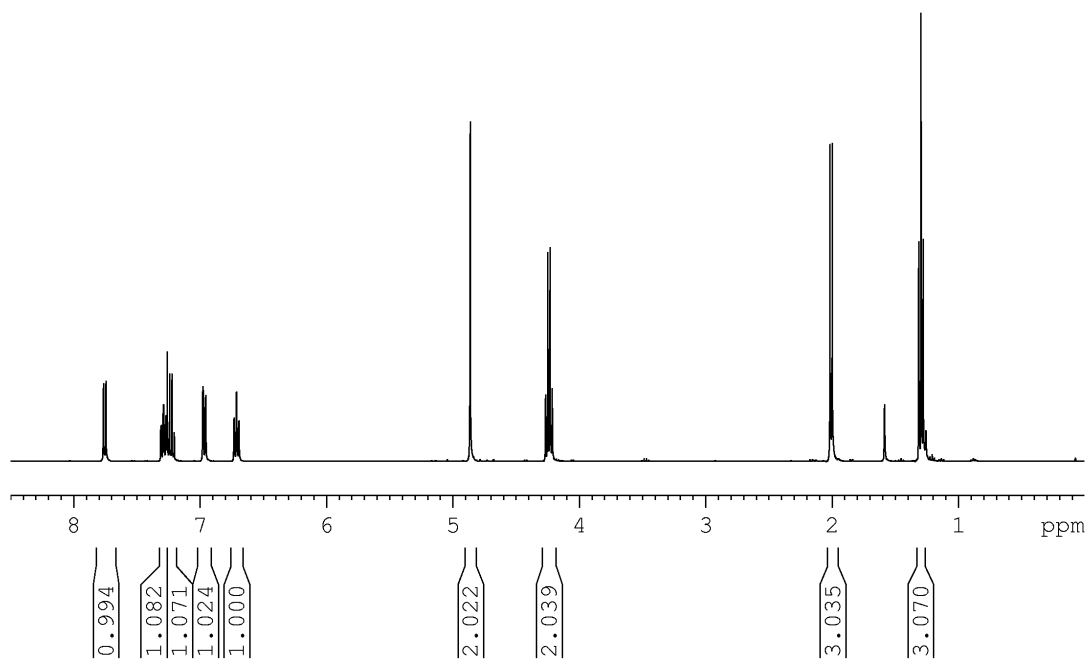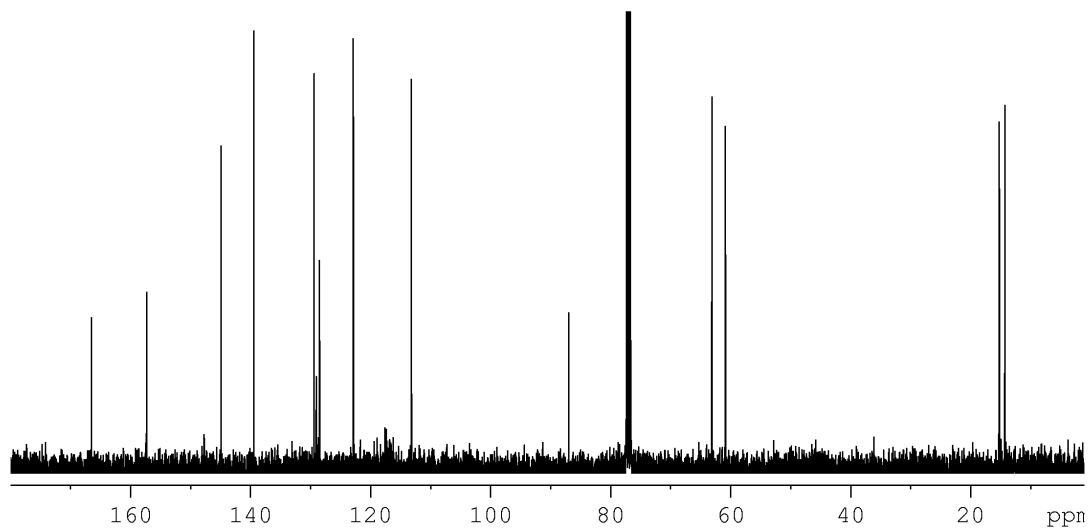

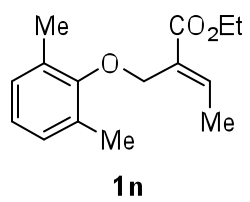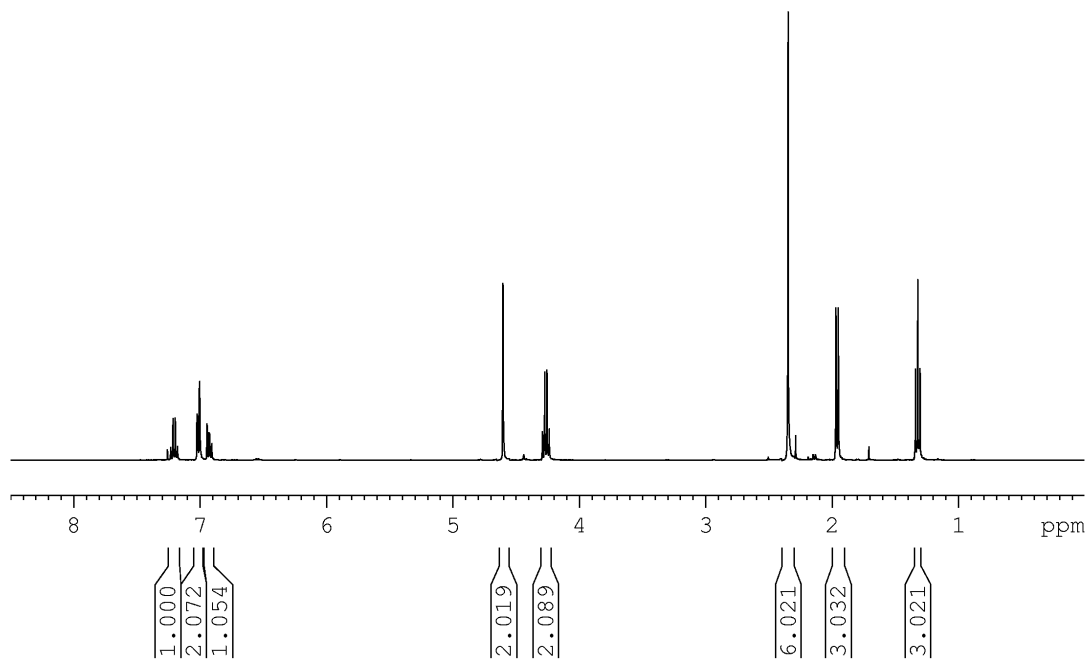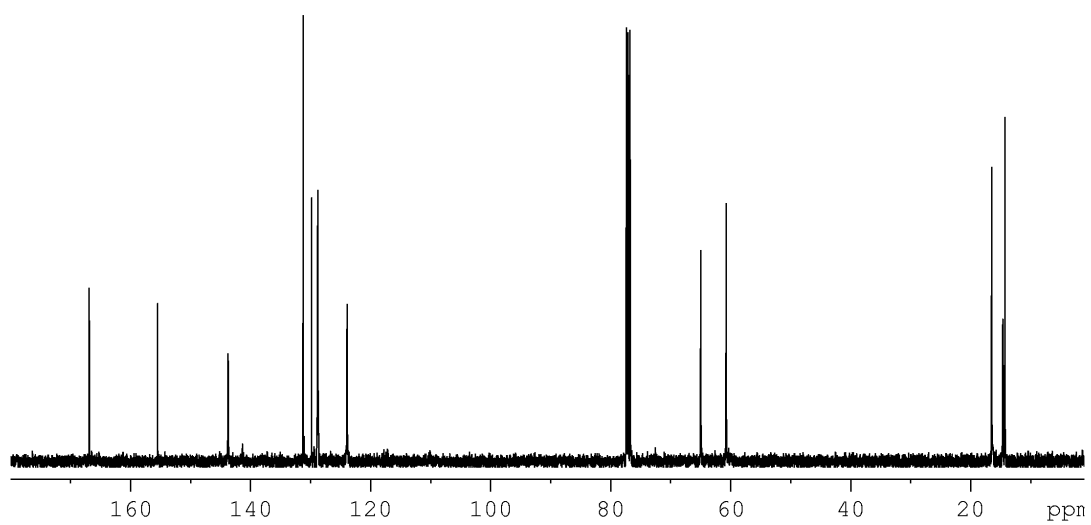

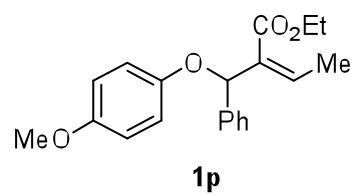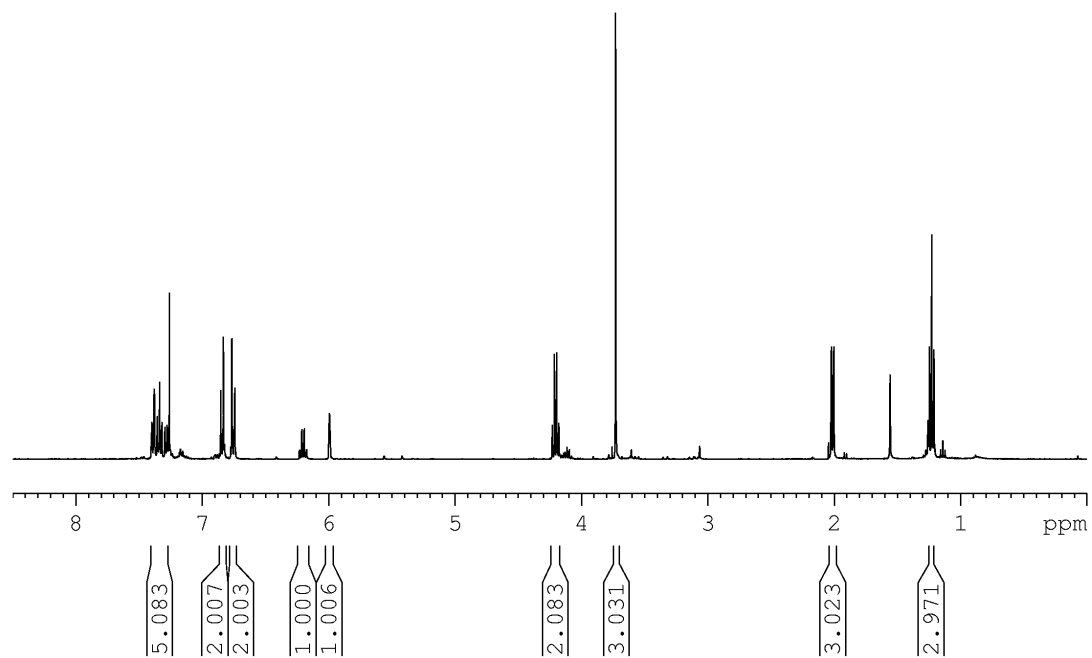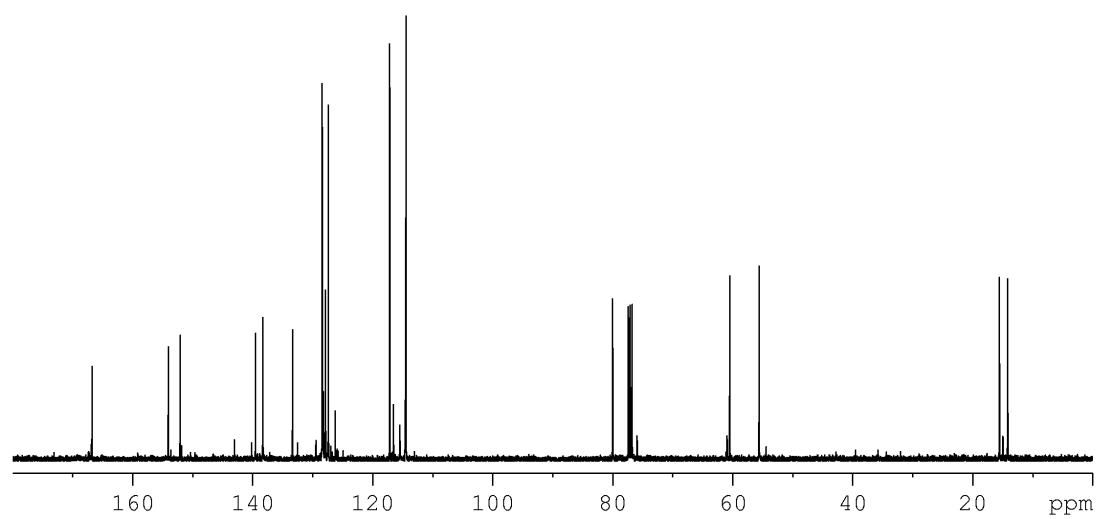

**Compound 1p NOESY**

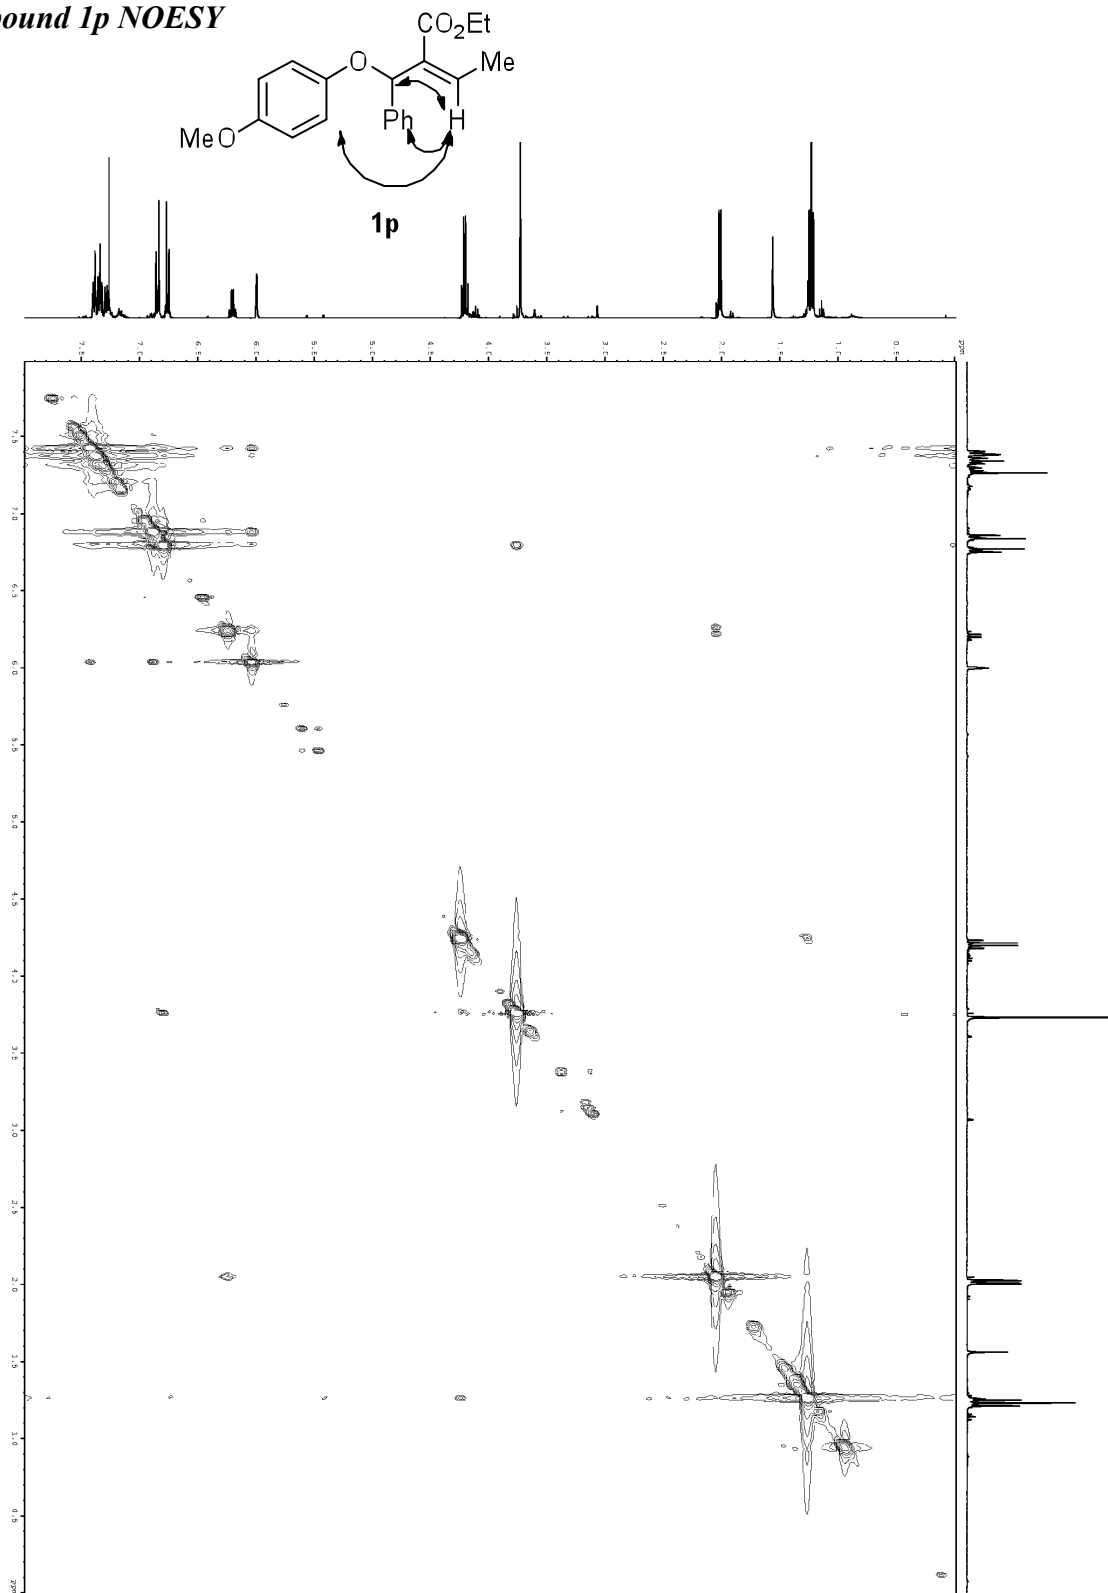

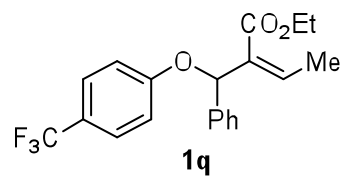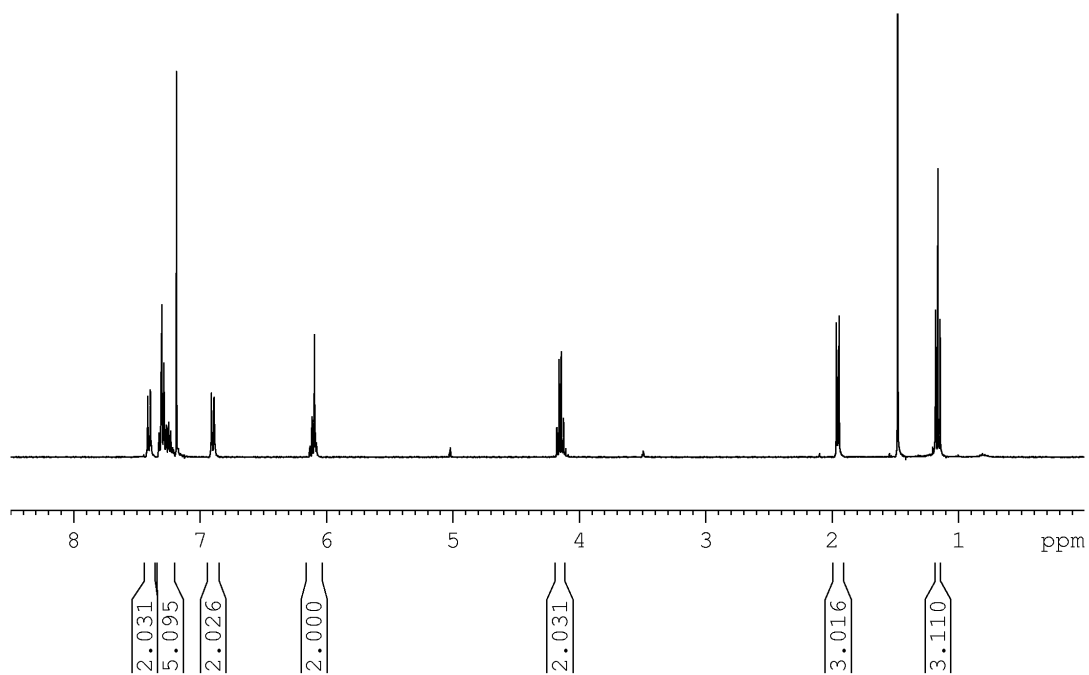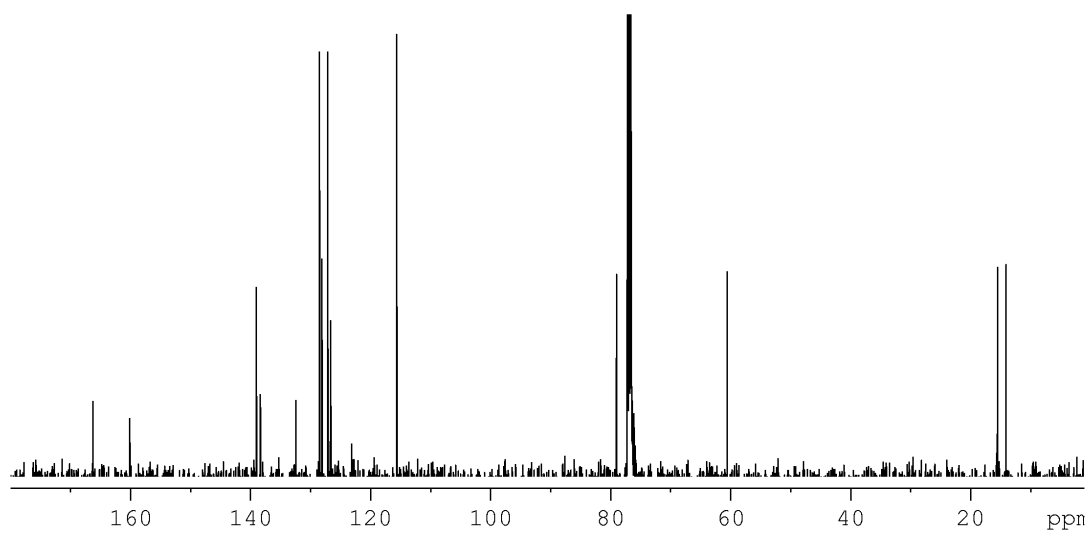



**Compound 1q NOESY**

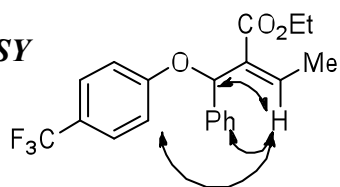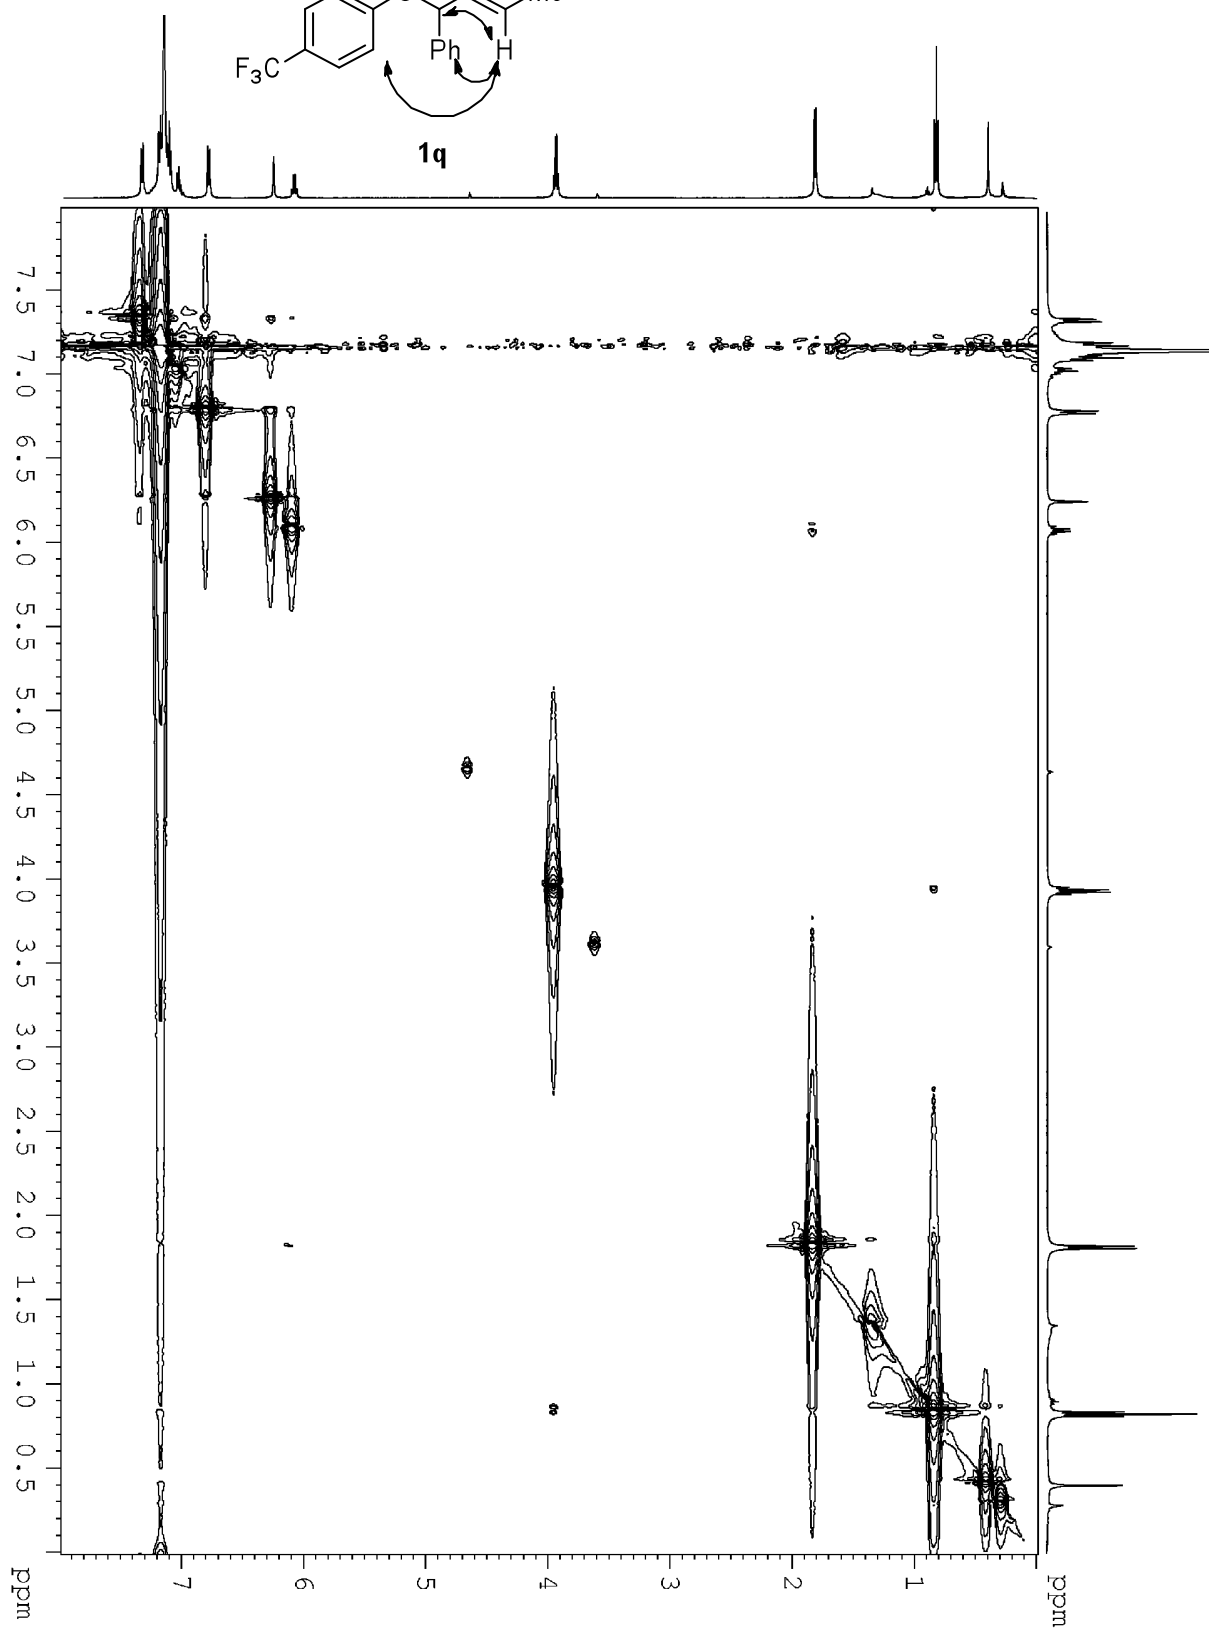

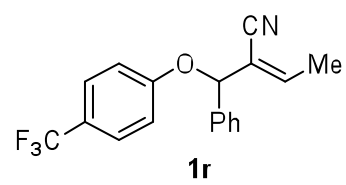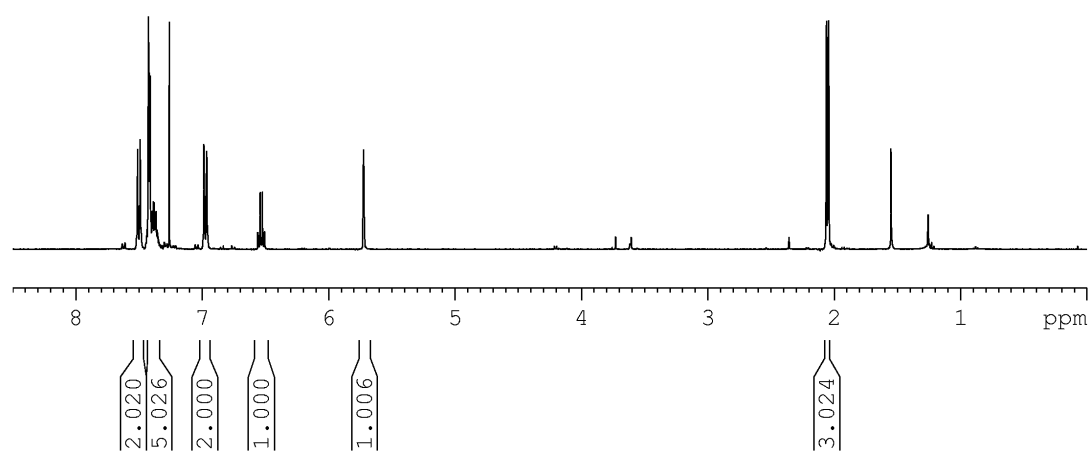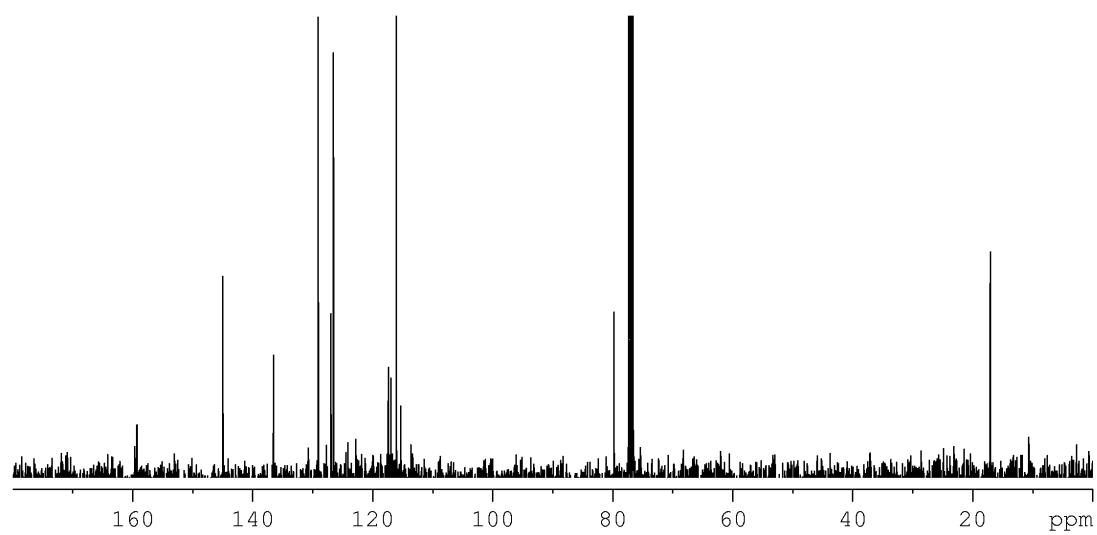

**Compound 1m NOESY**

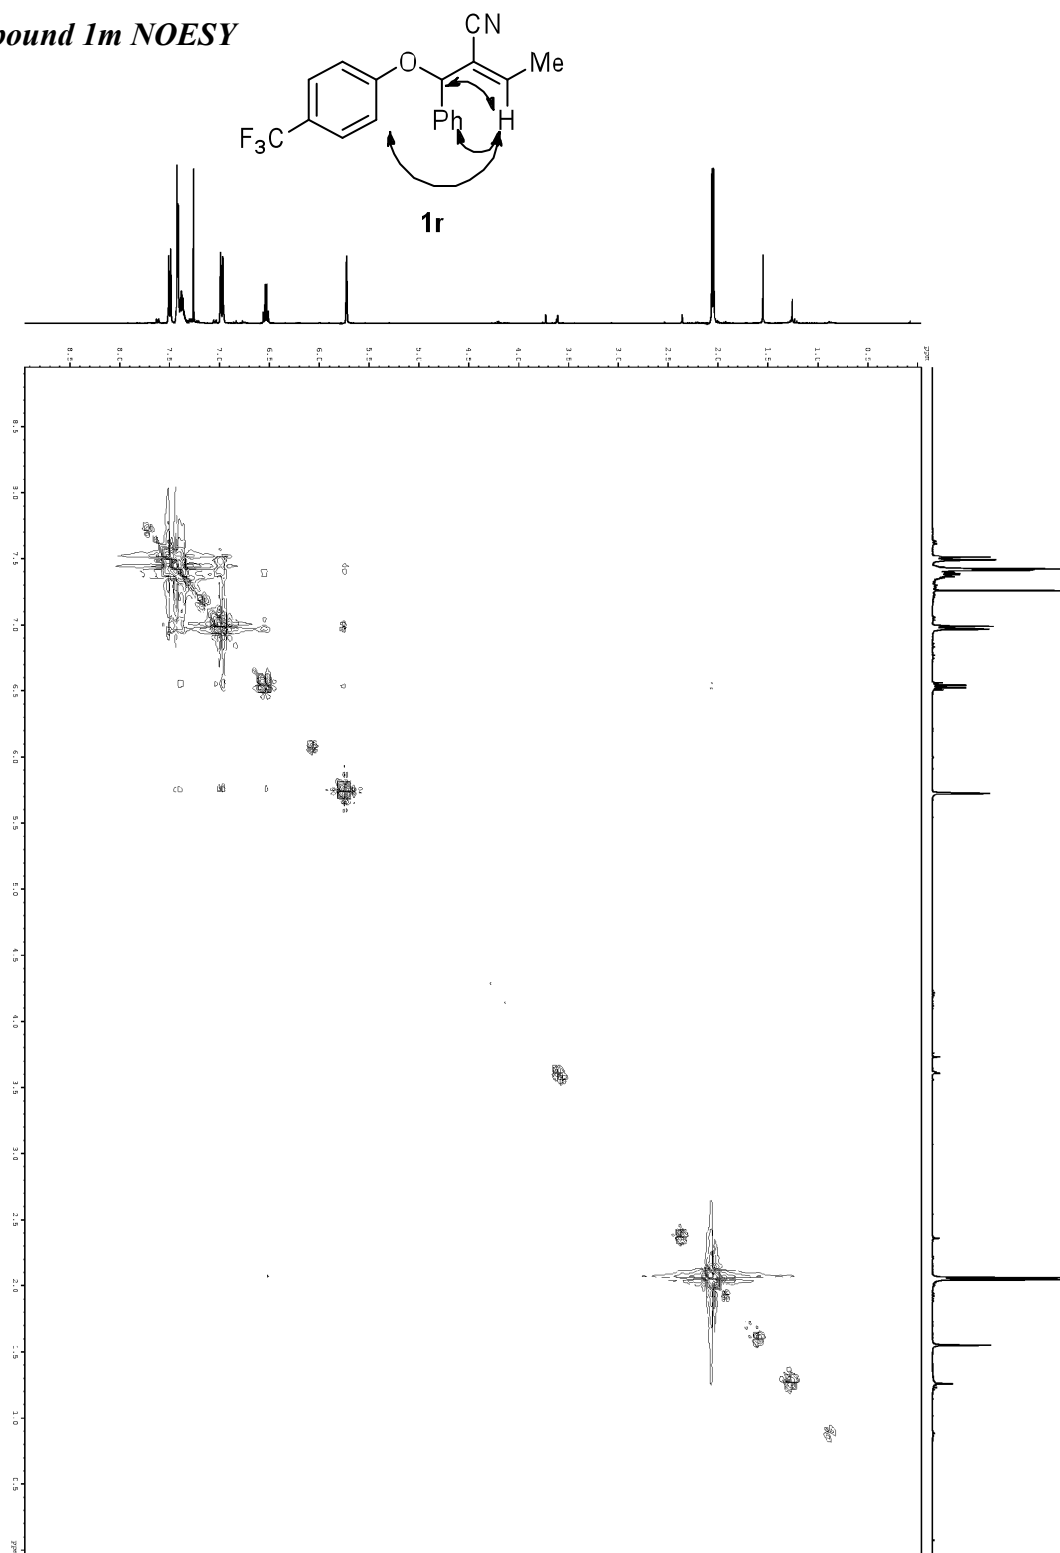

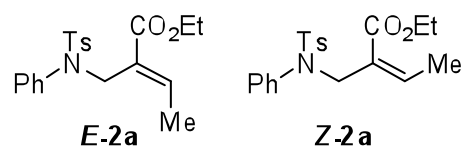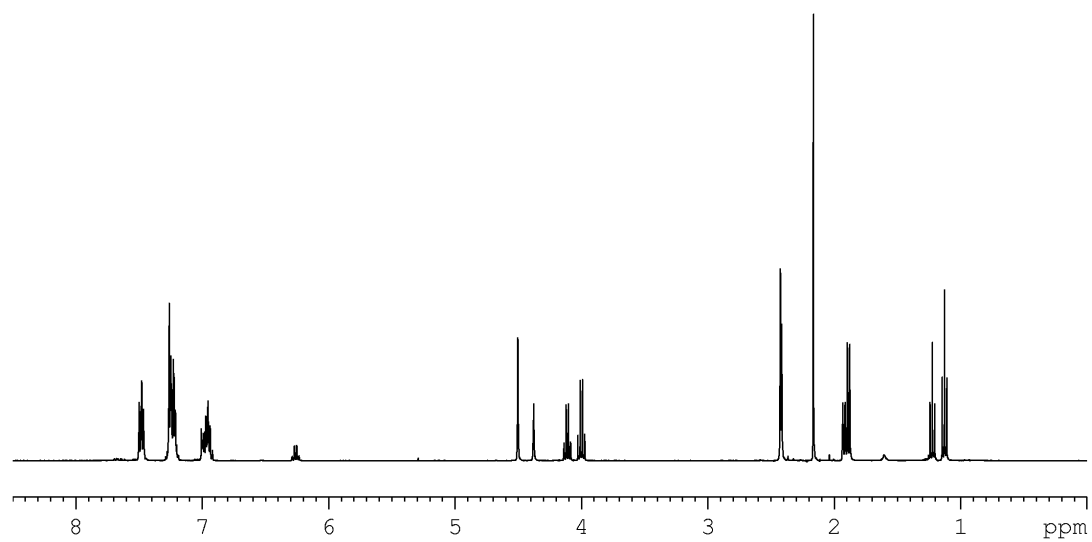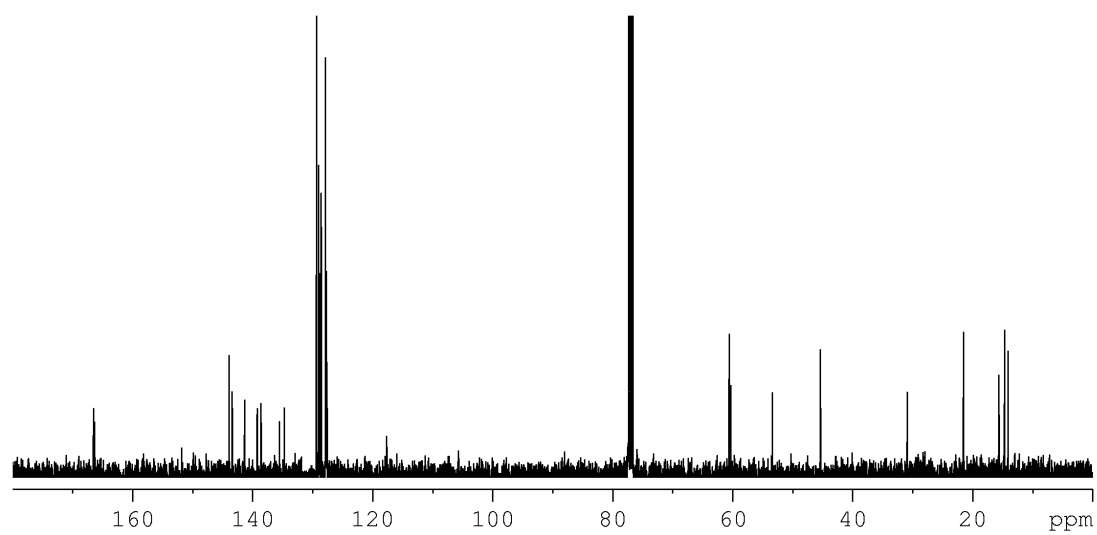

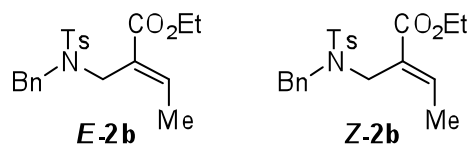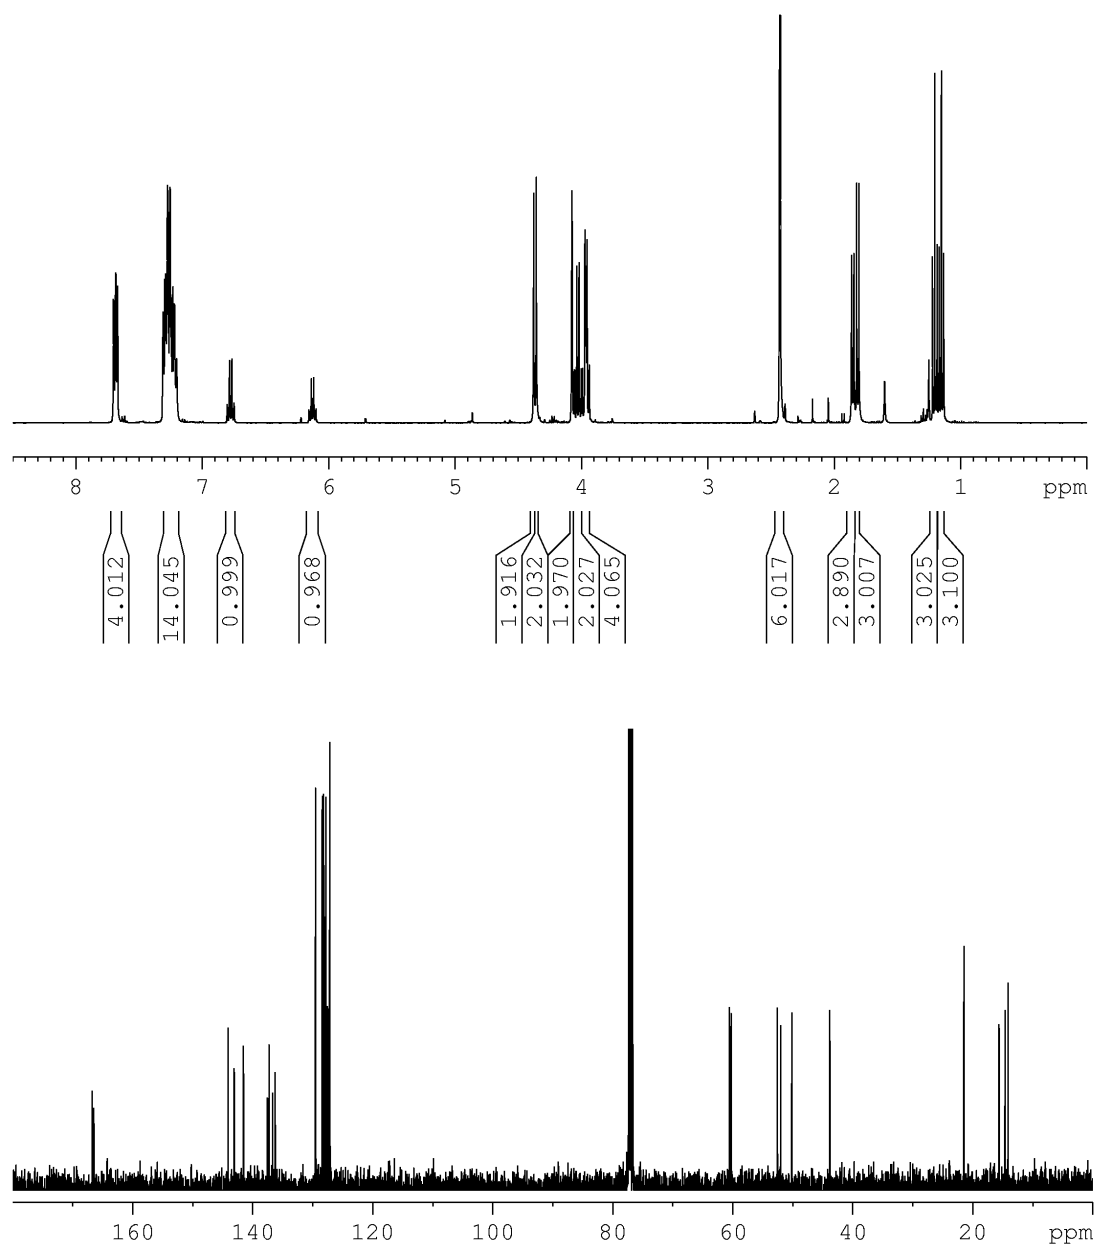

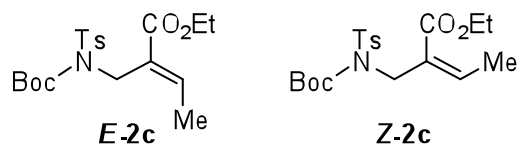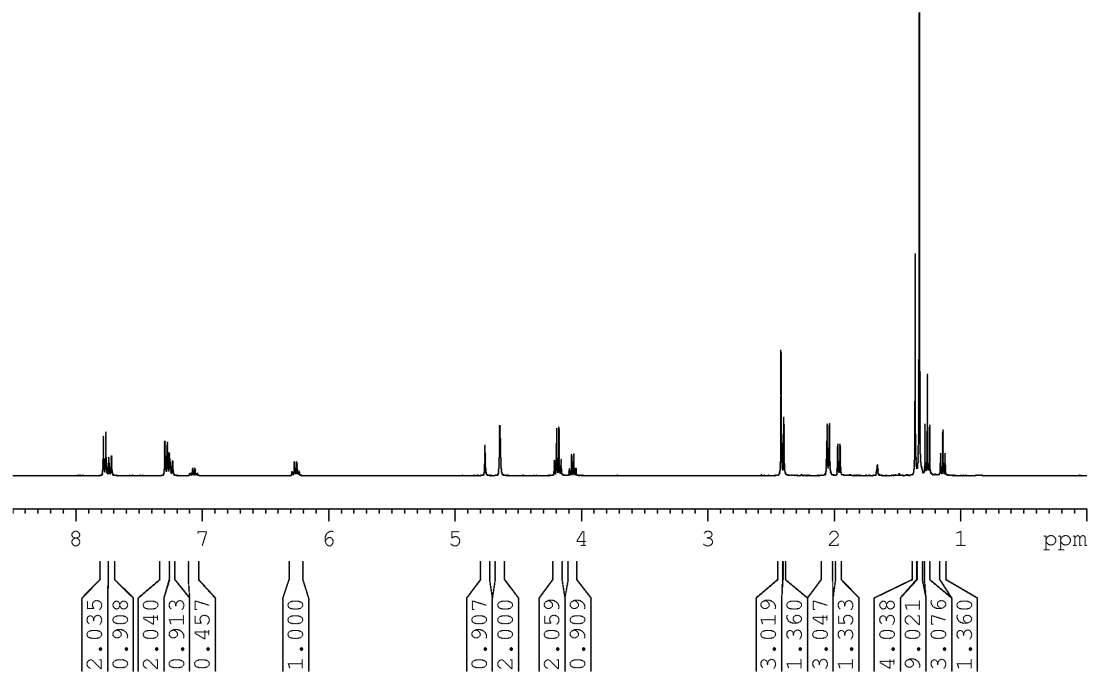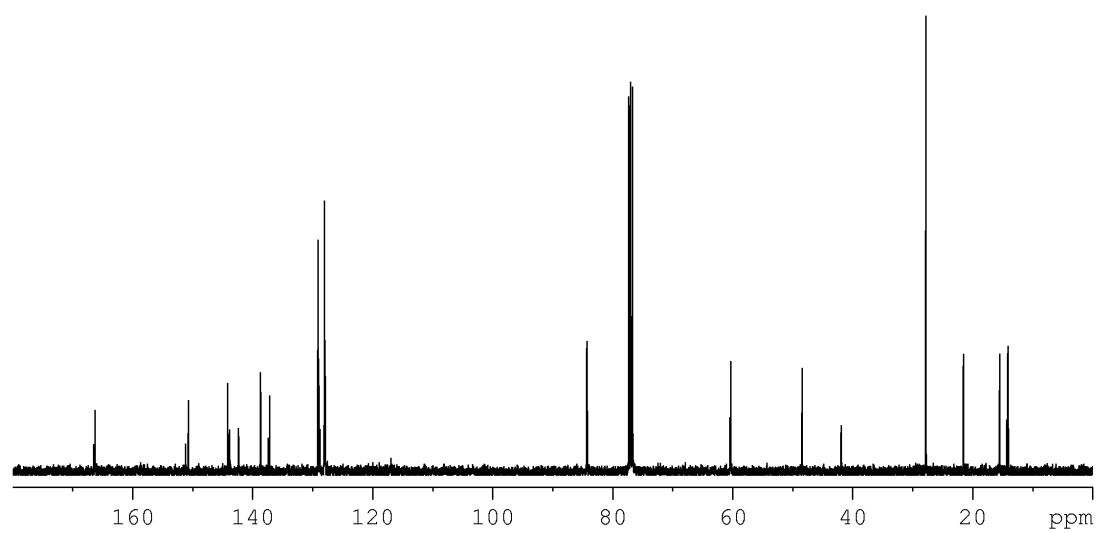

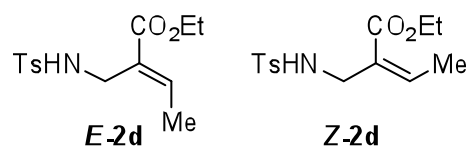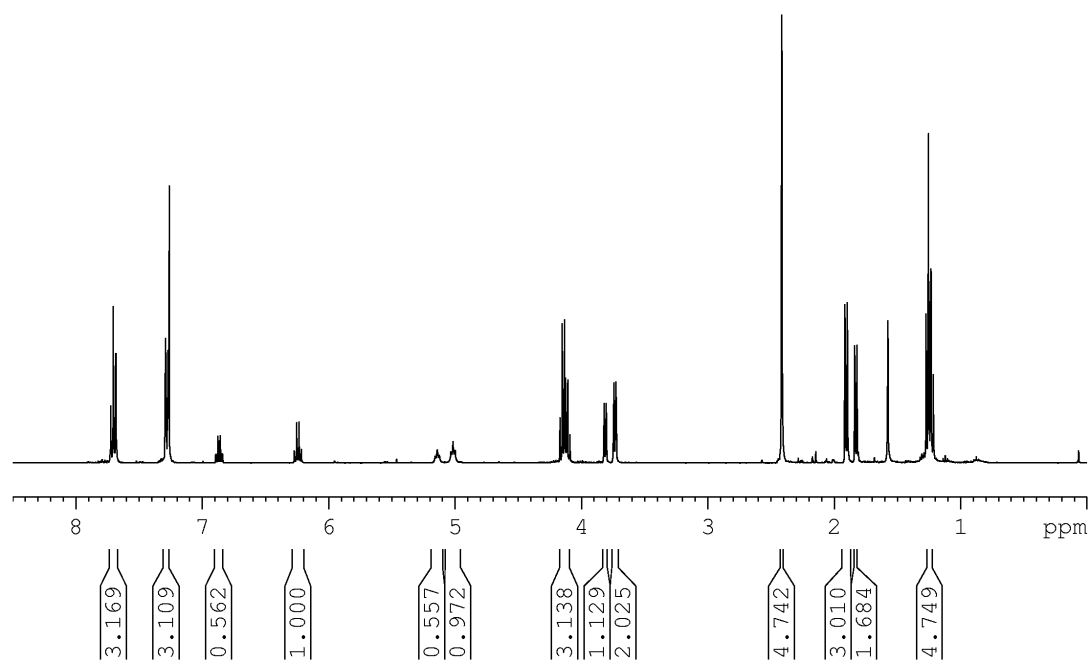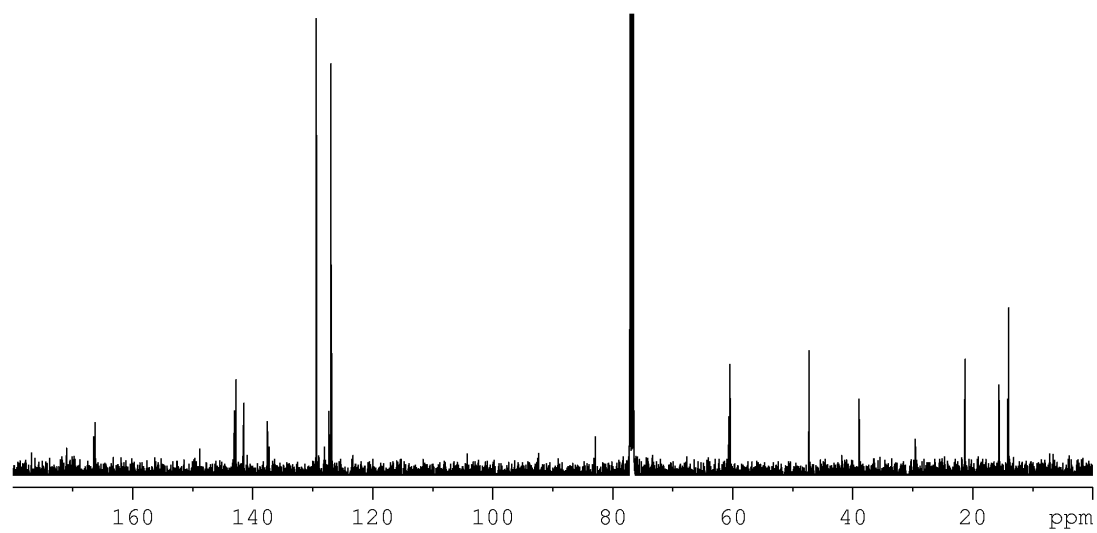

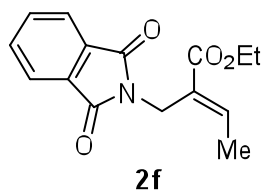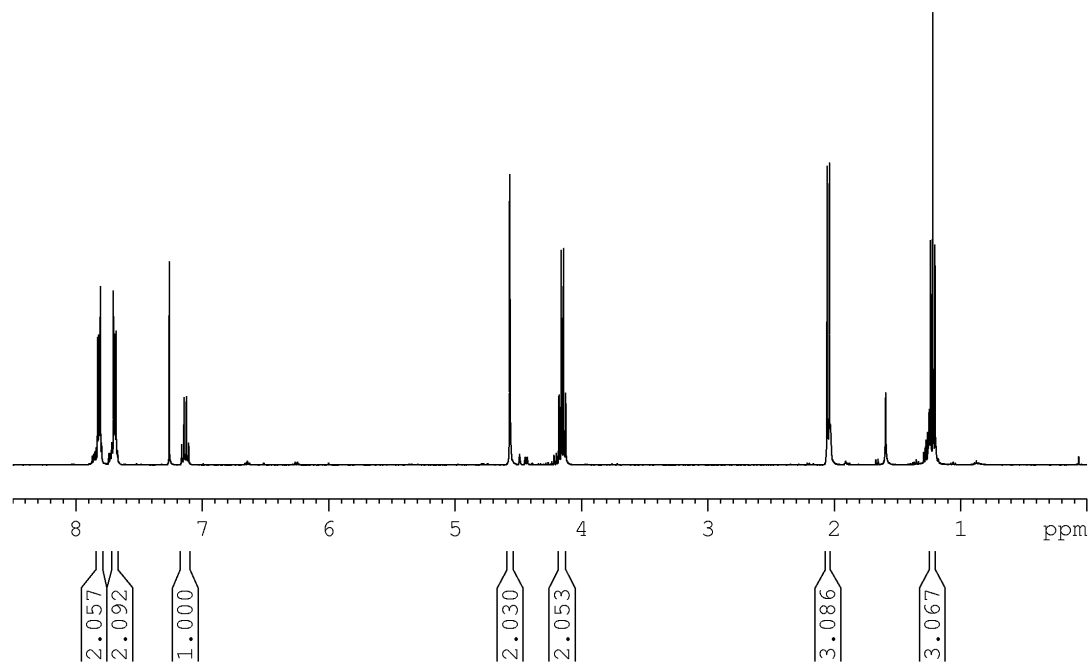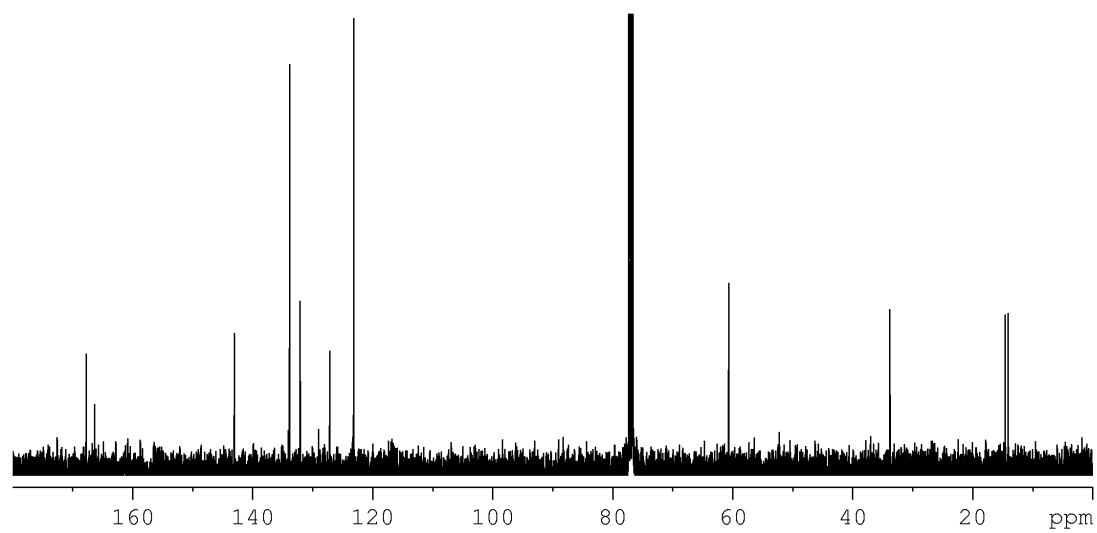



**Compound 2f NOESY**

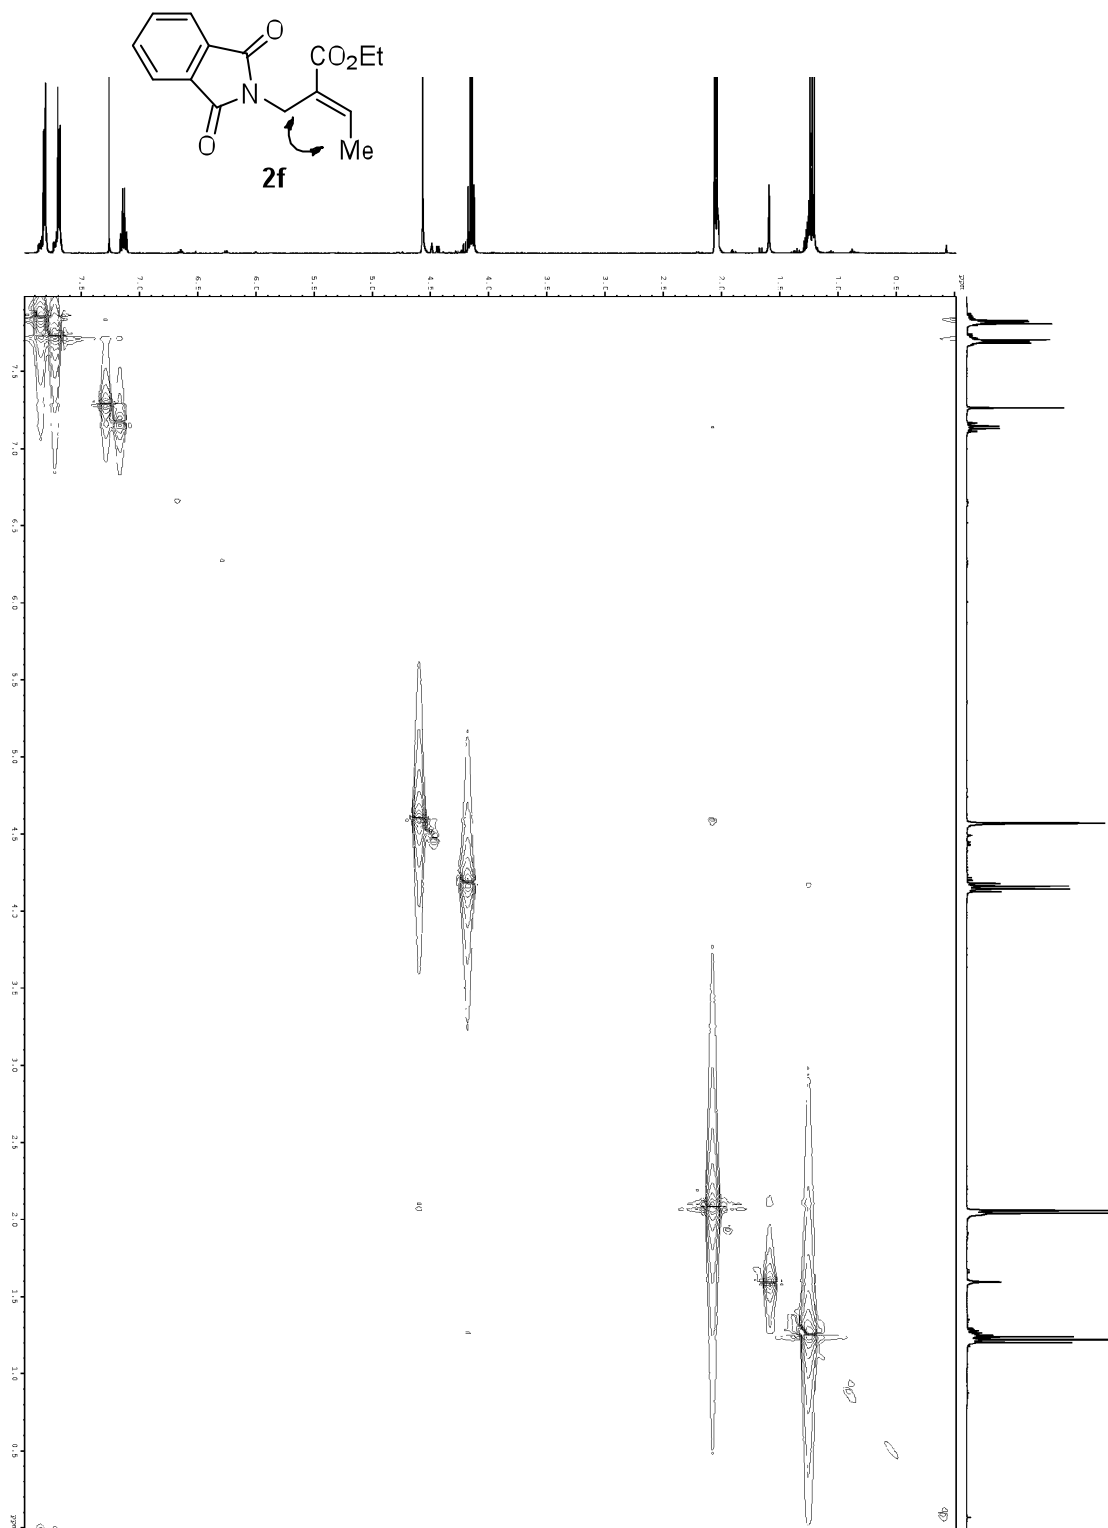

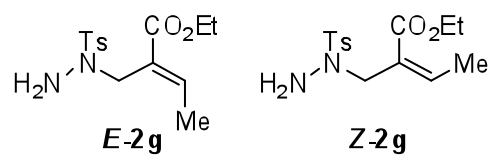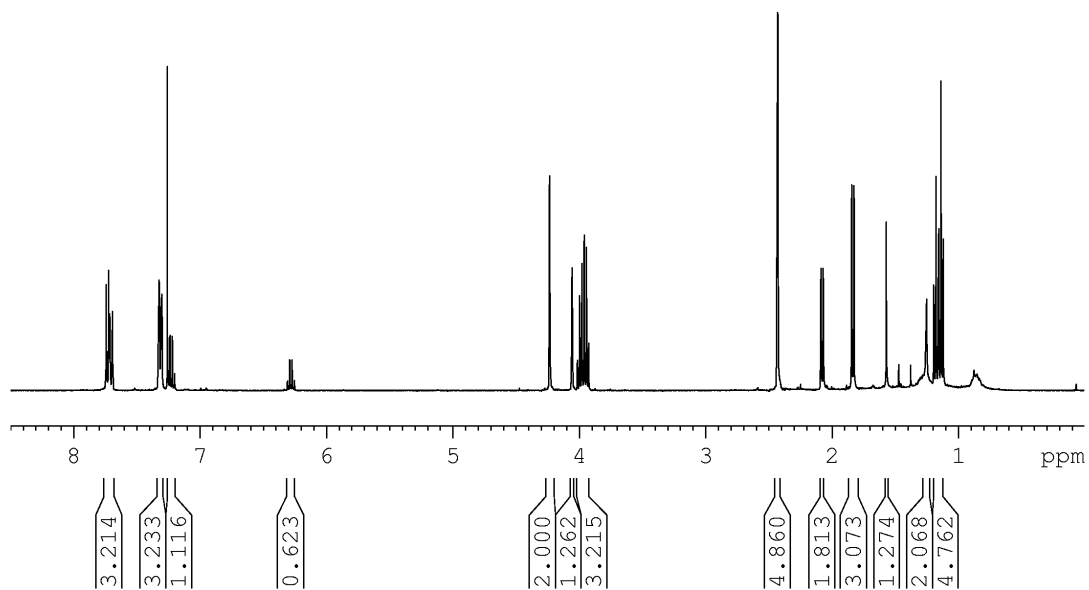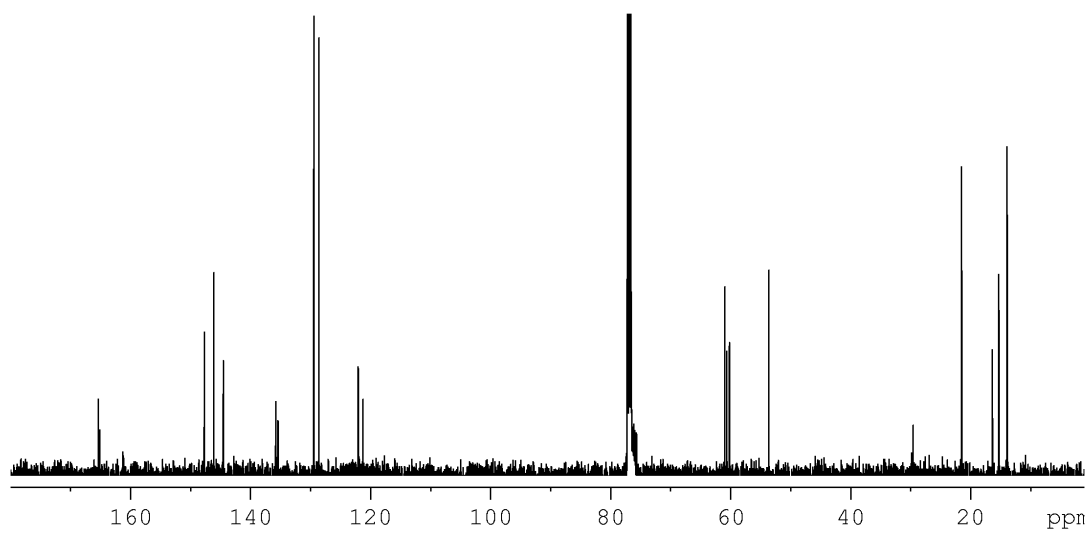

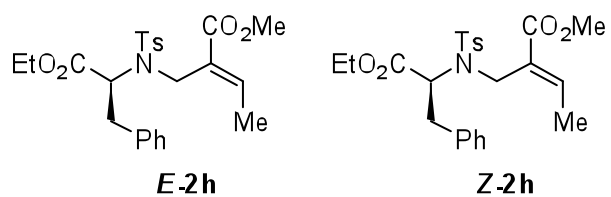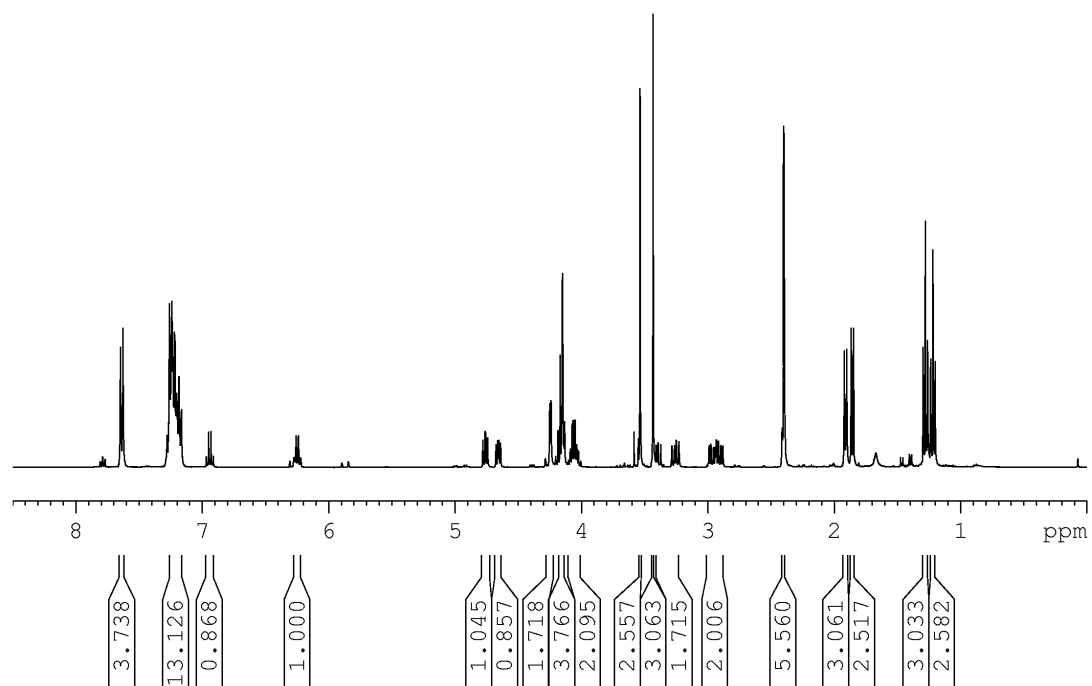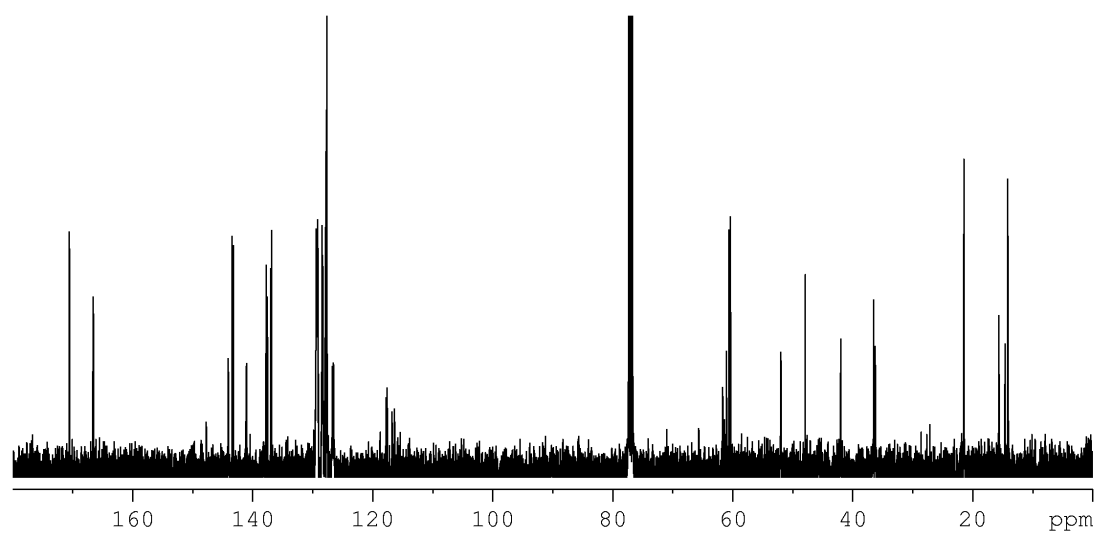

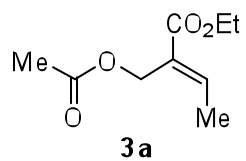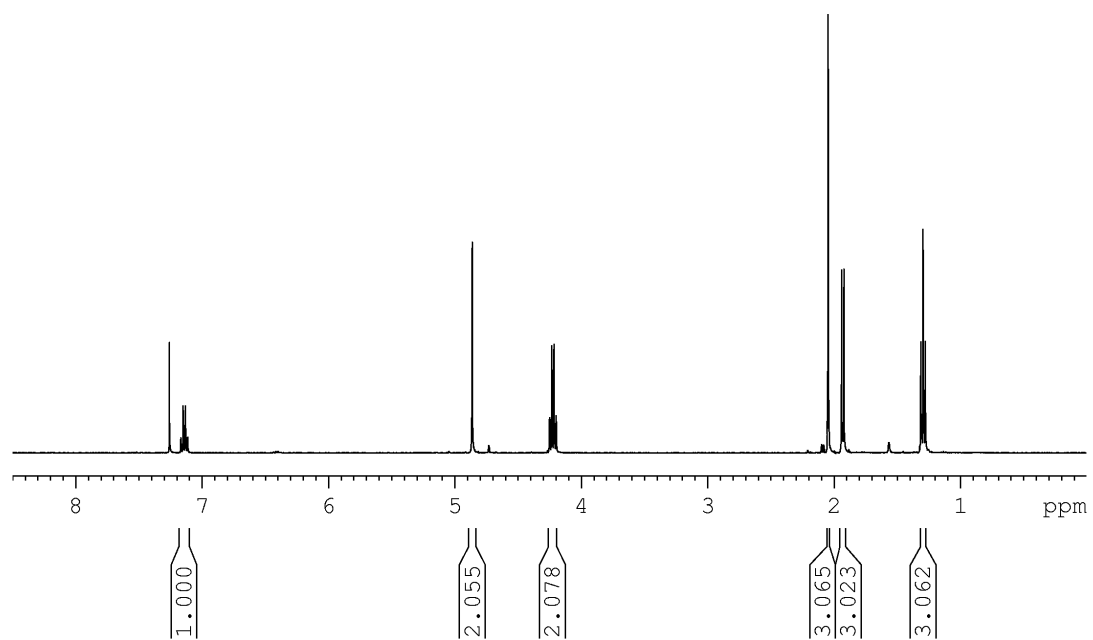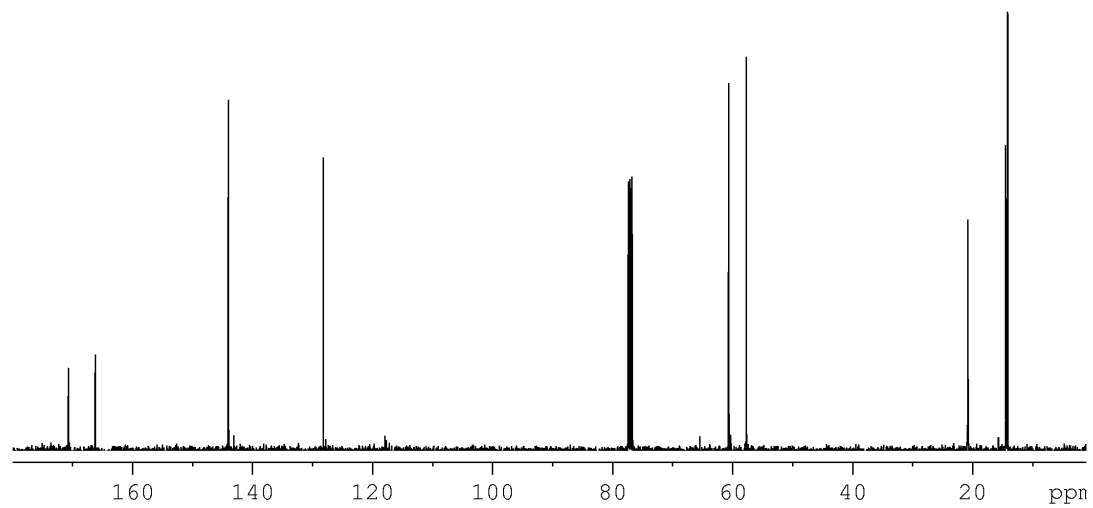

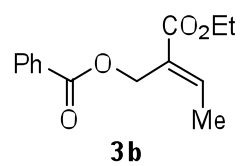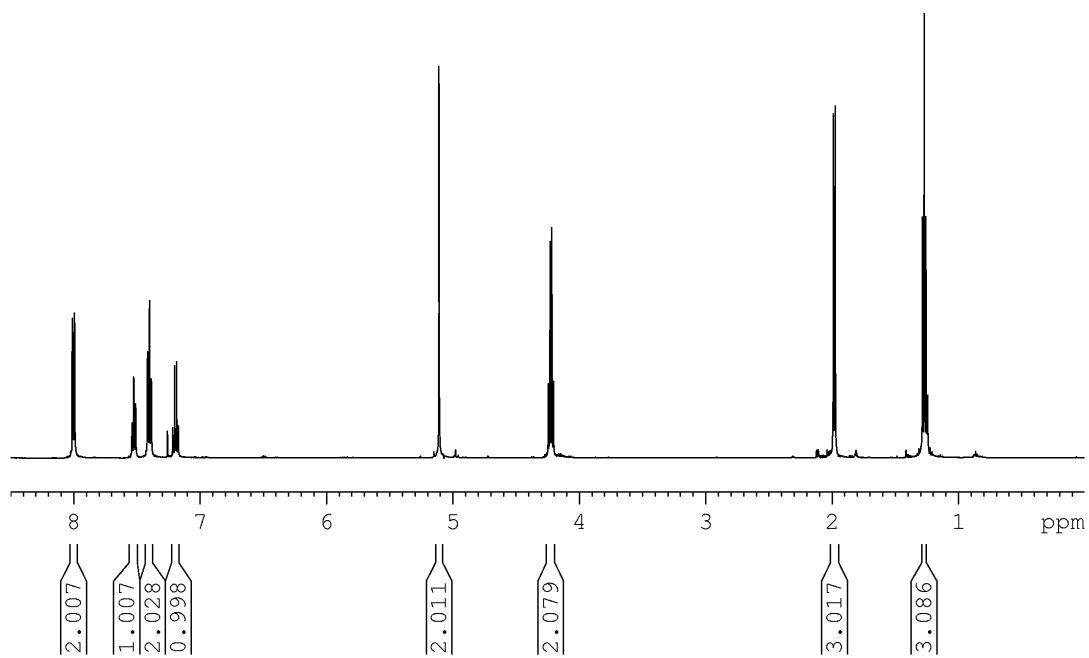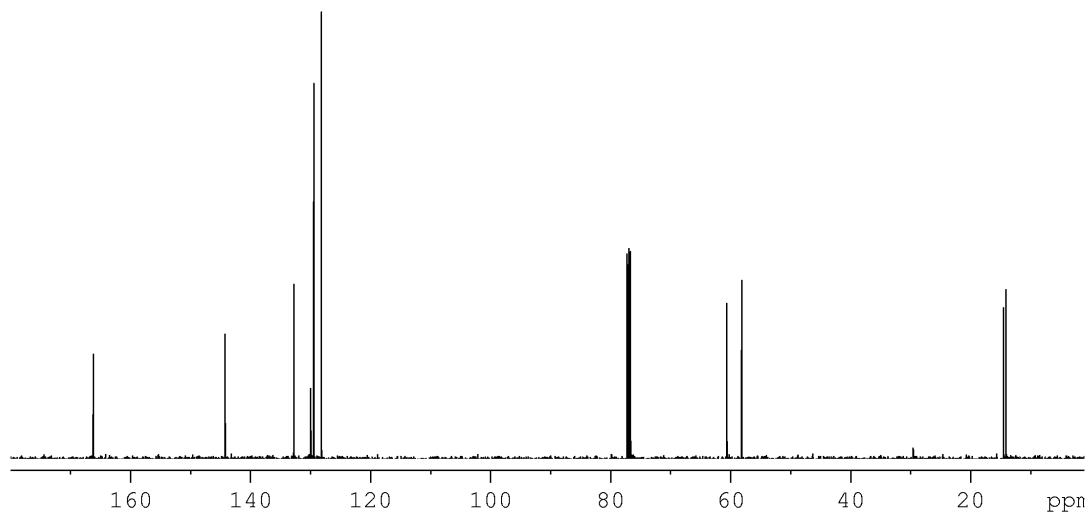

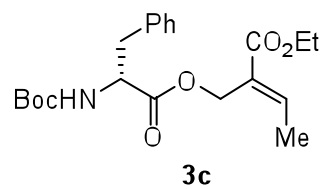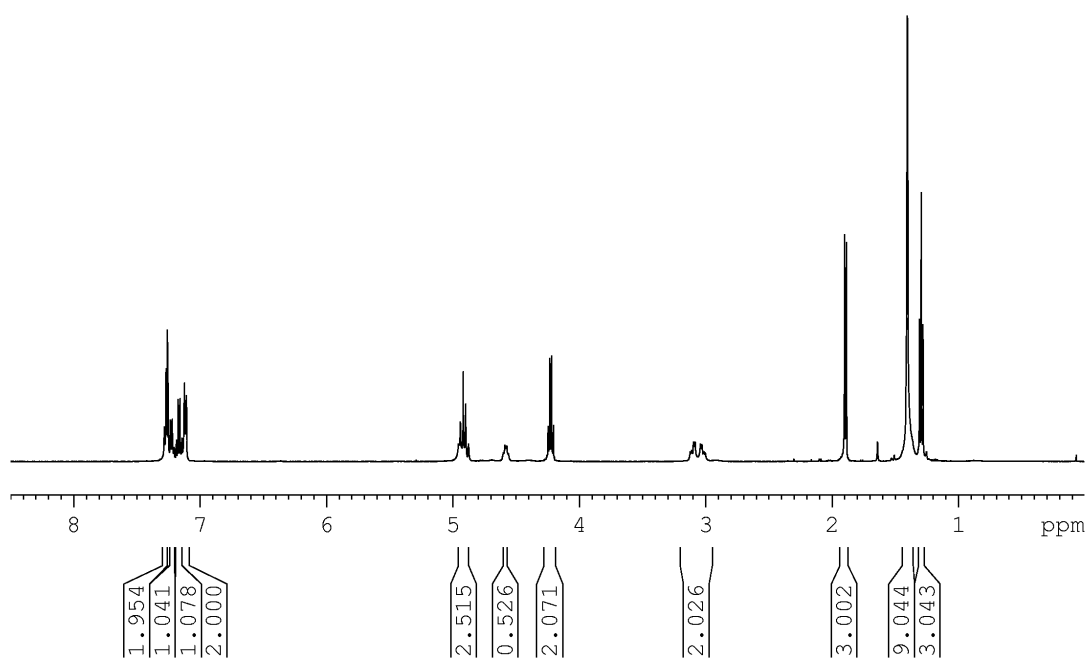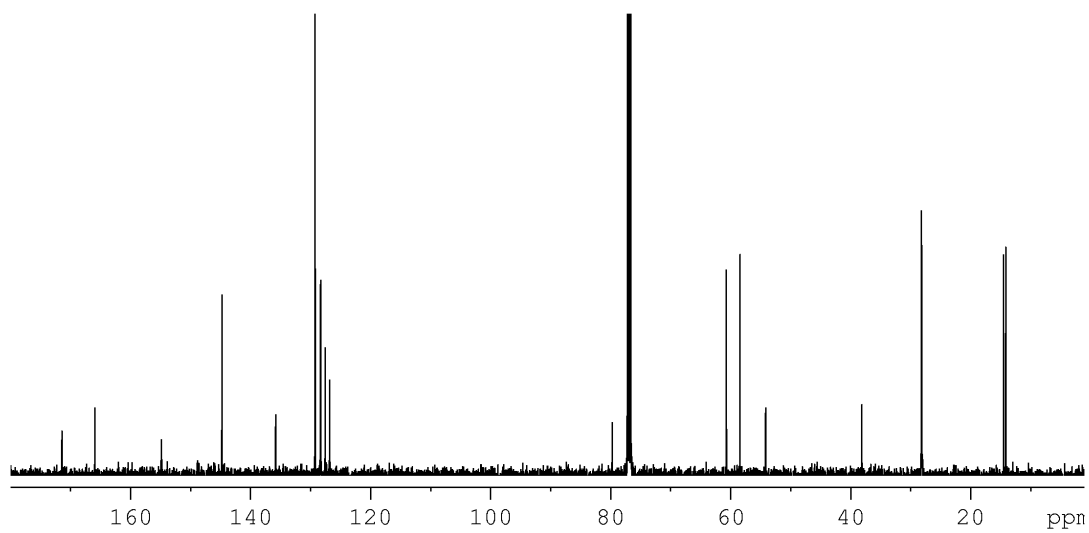

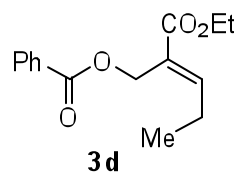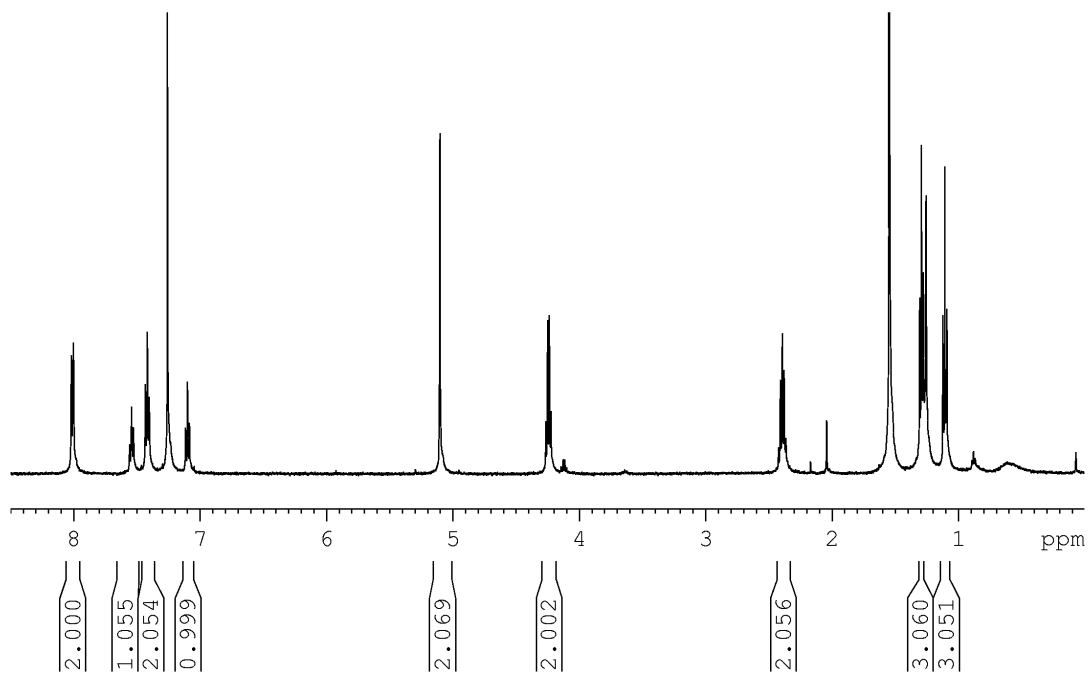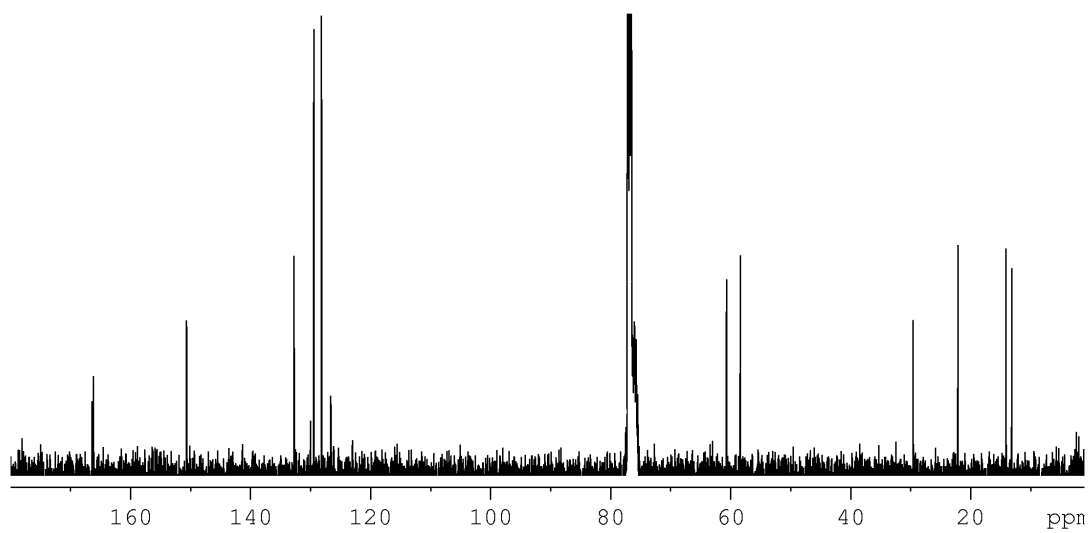

**Compound 3d NOESY**

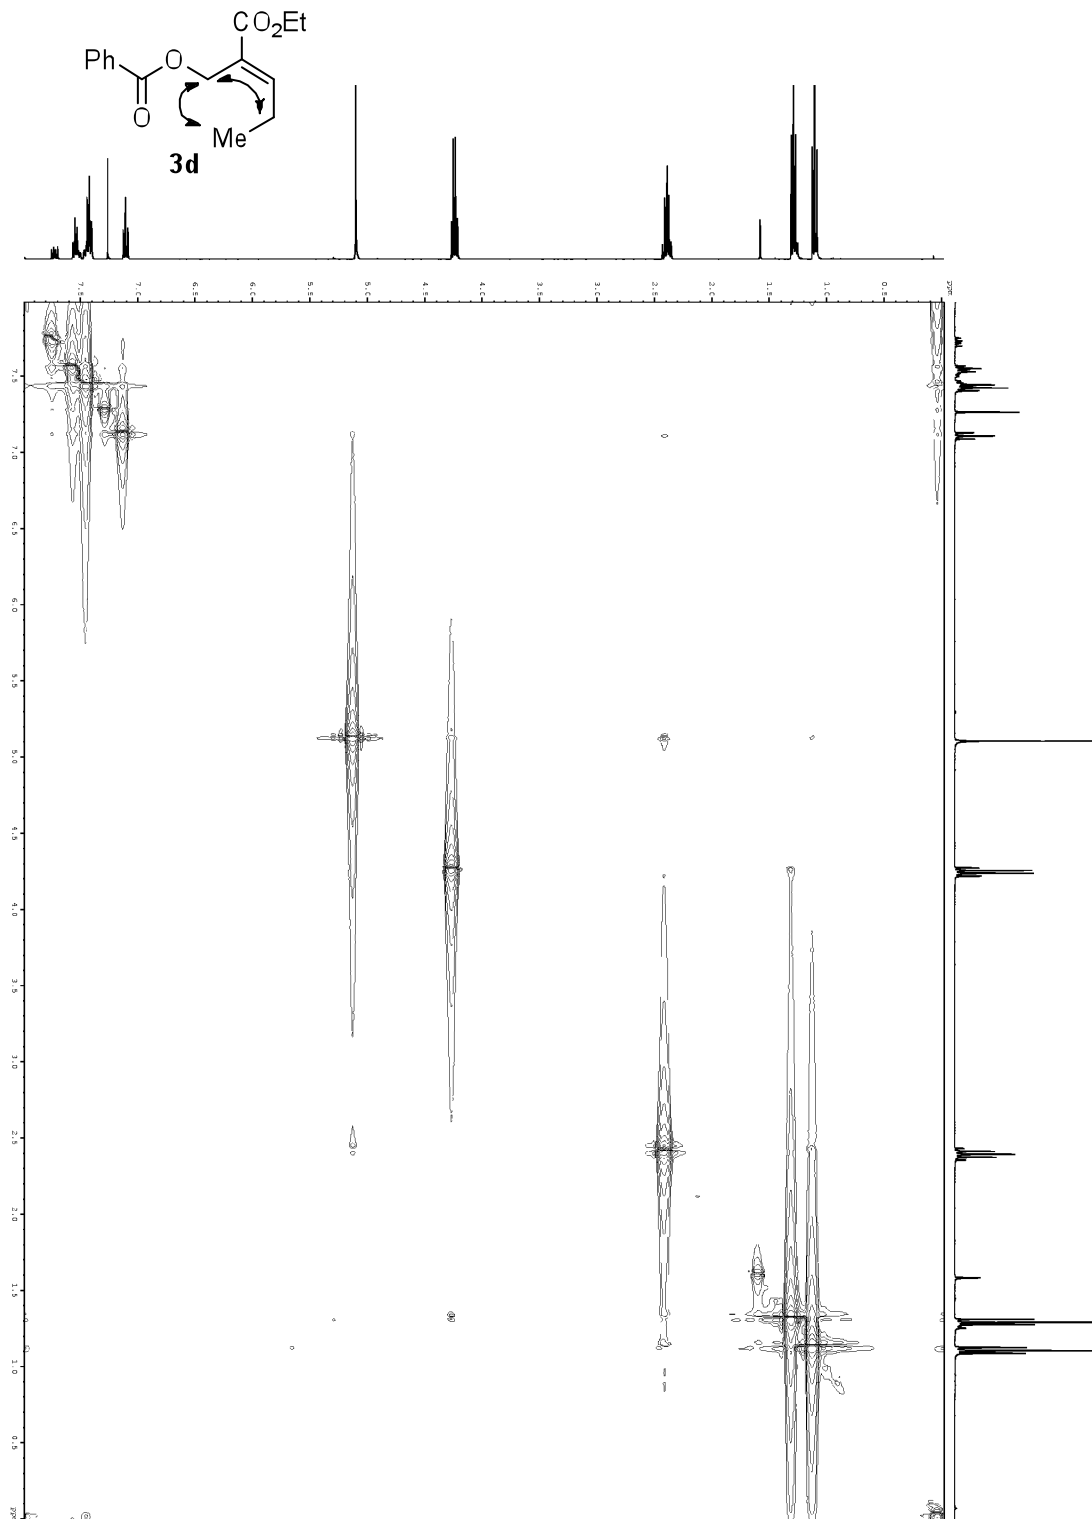



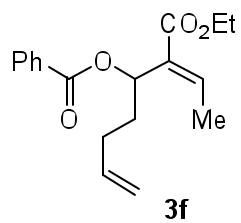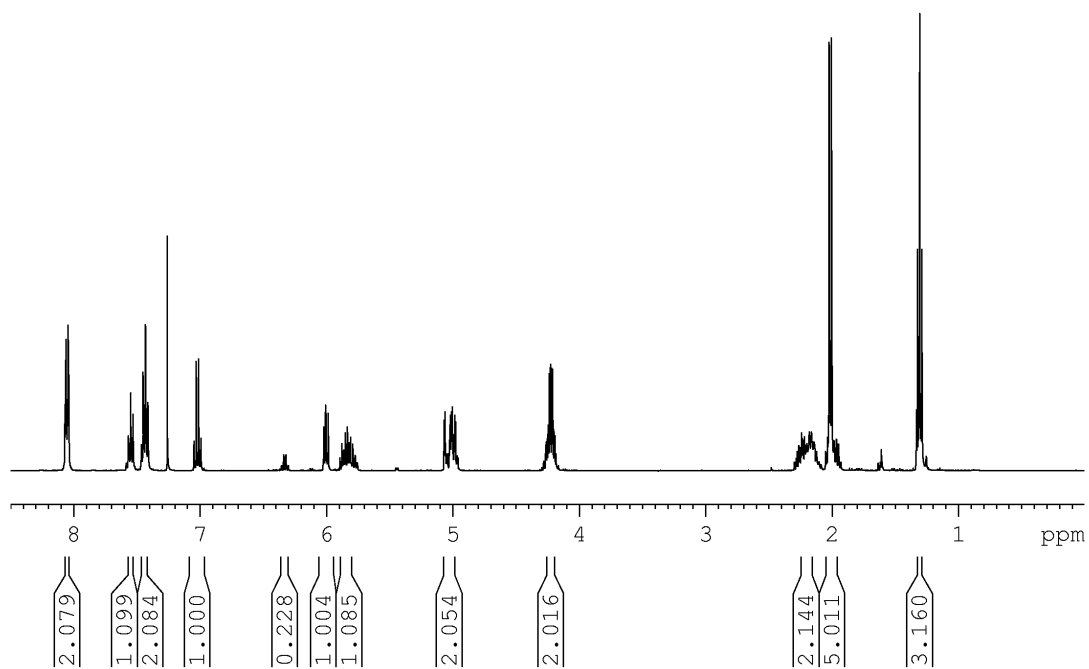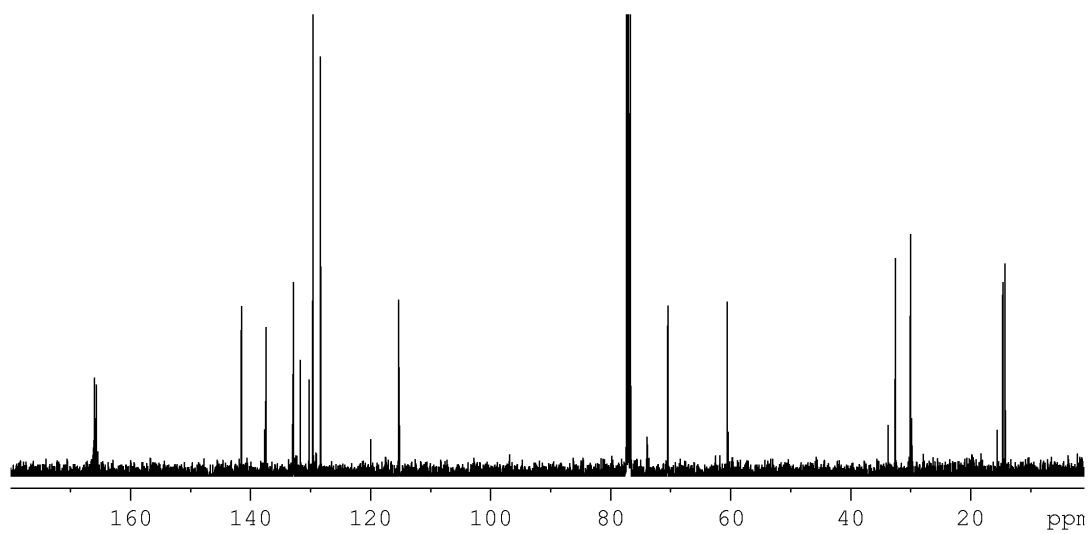

**Compound 3f NOESY**

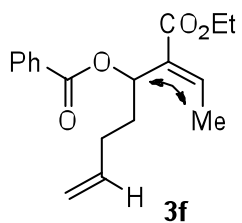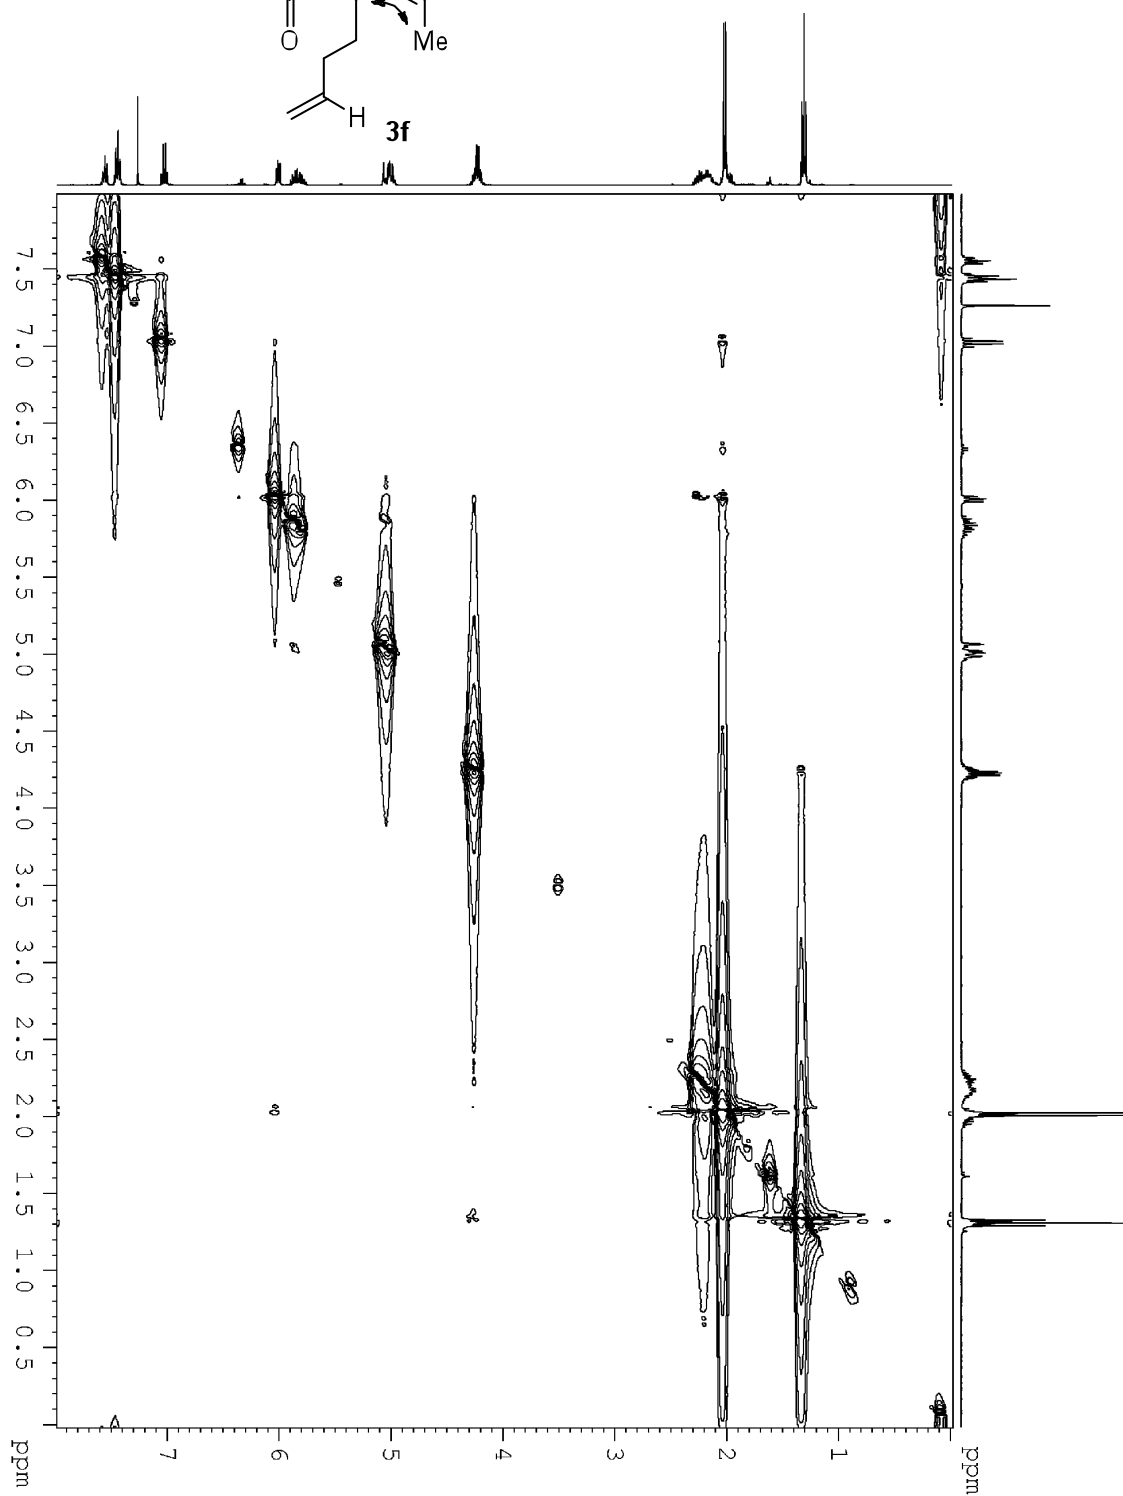

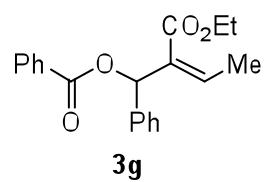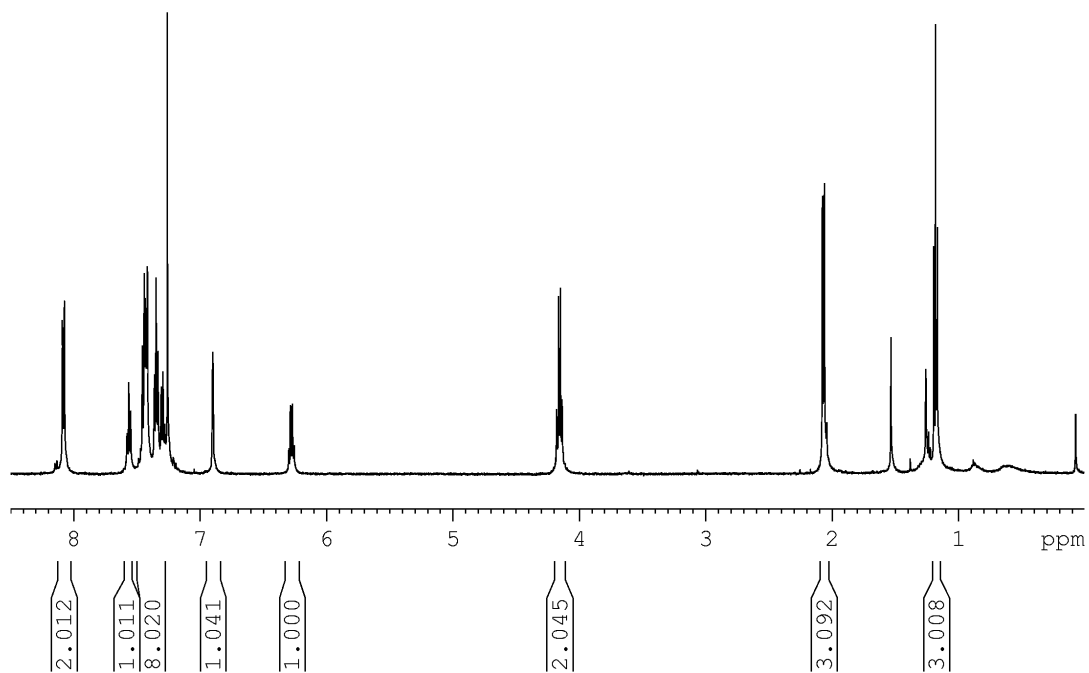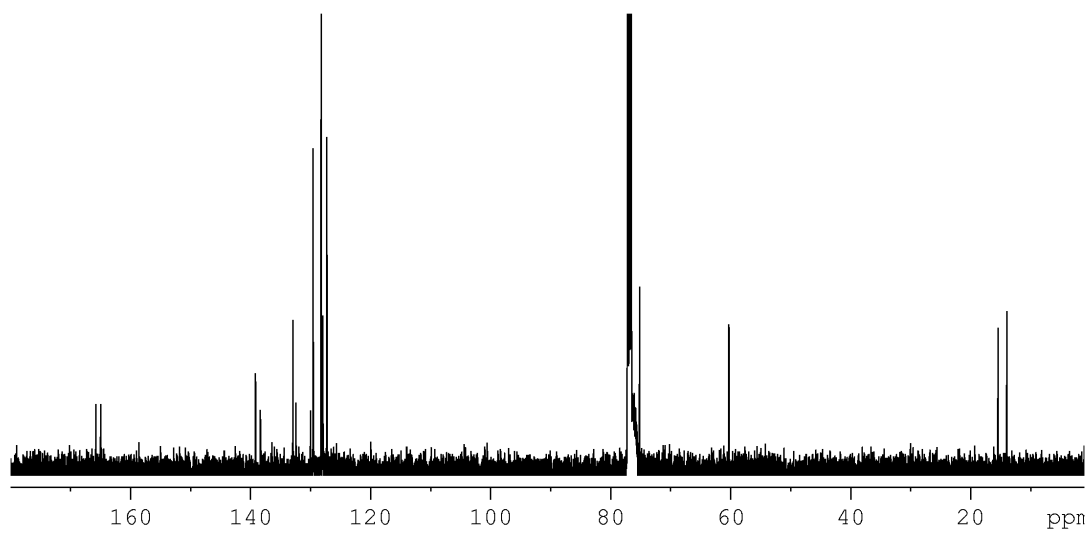

## Compound 3g NOESY

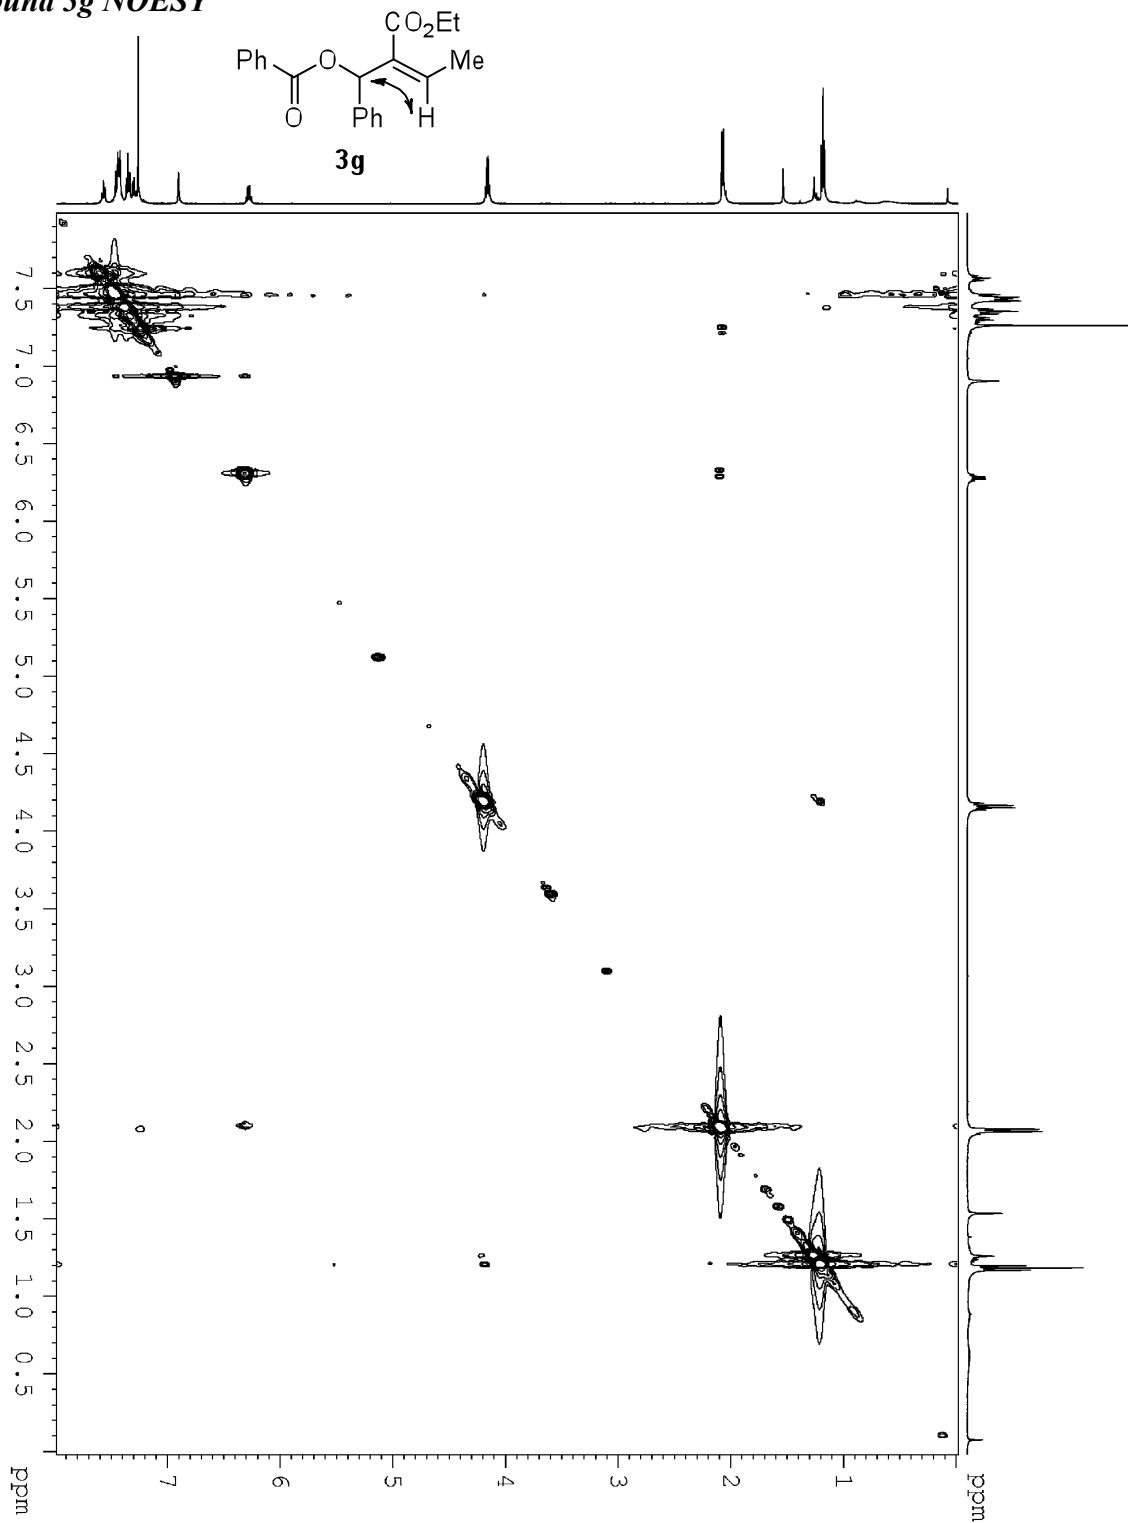

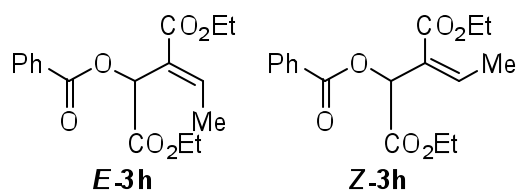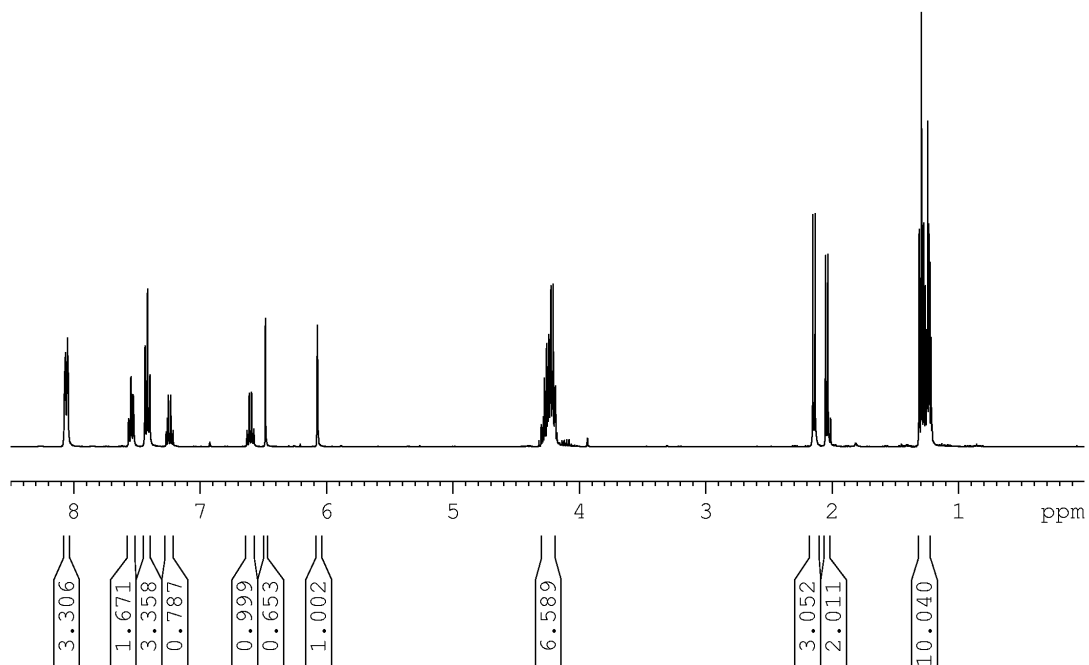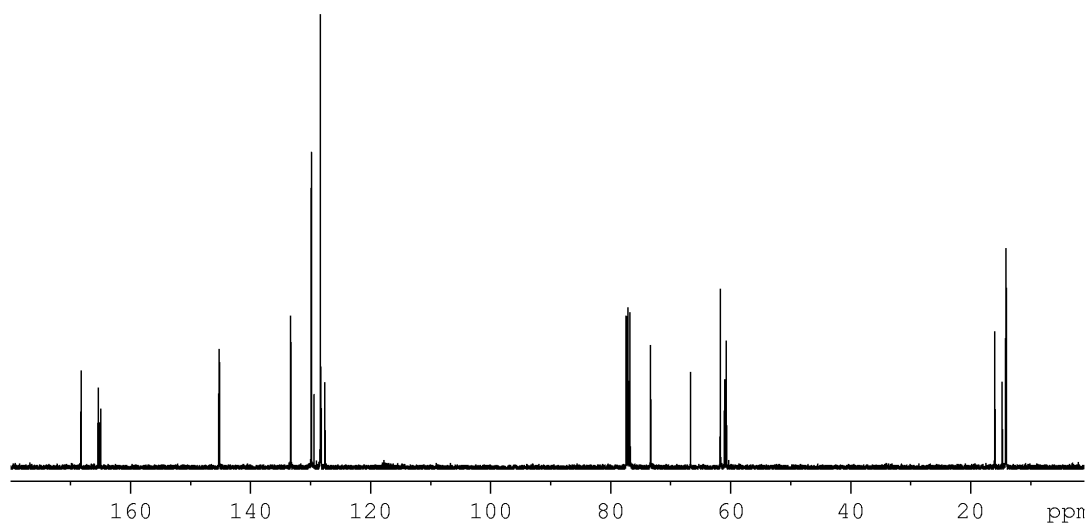

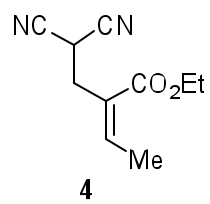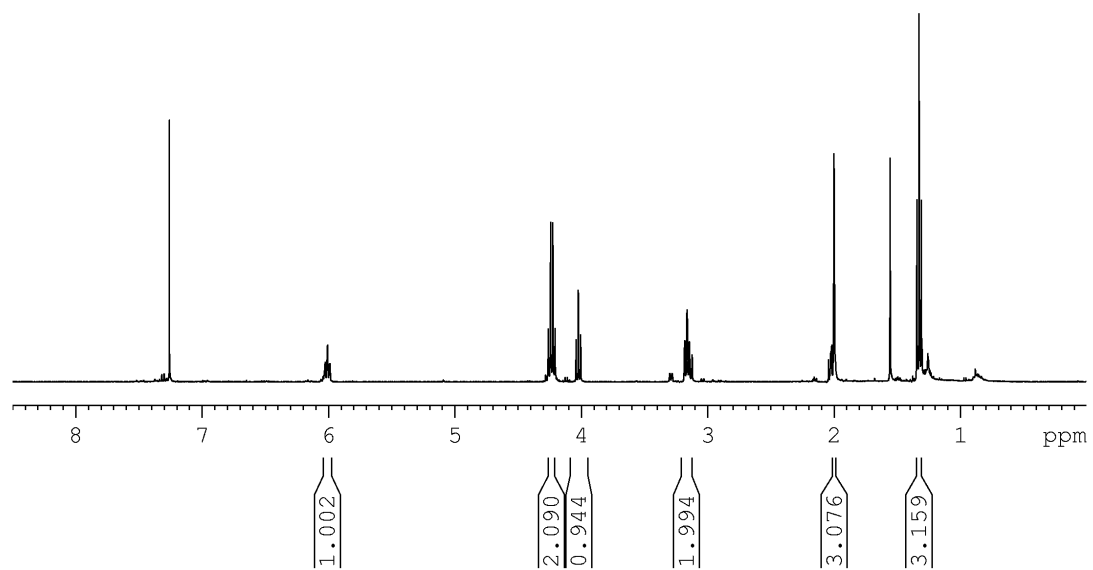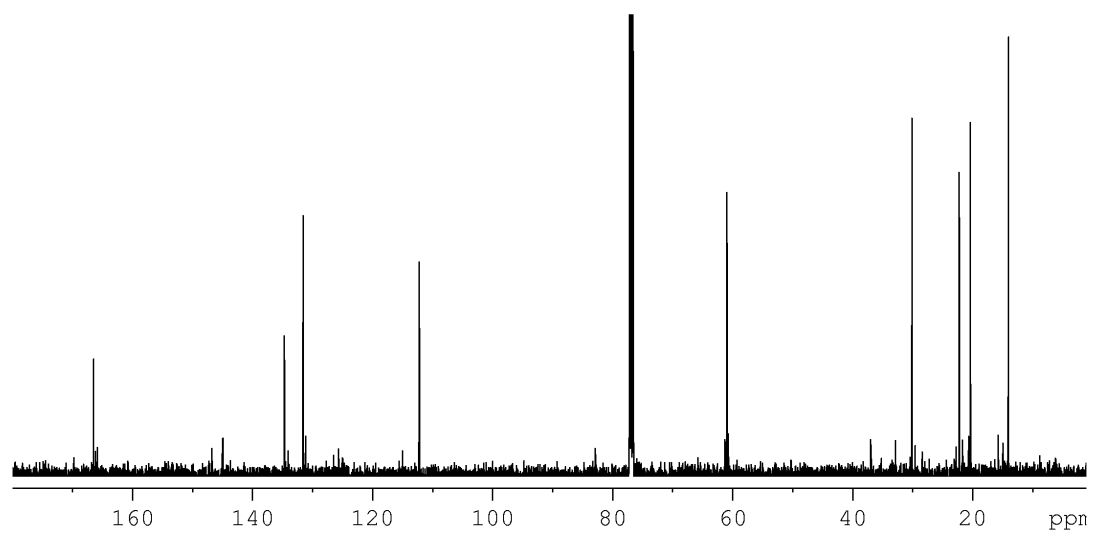

**Compound 4 NOESY**

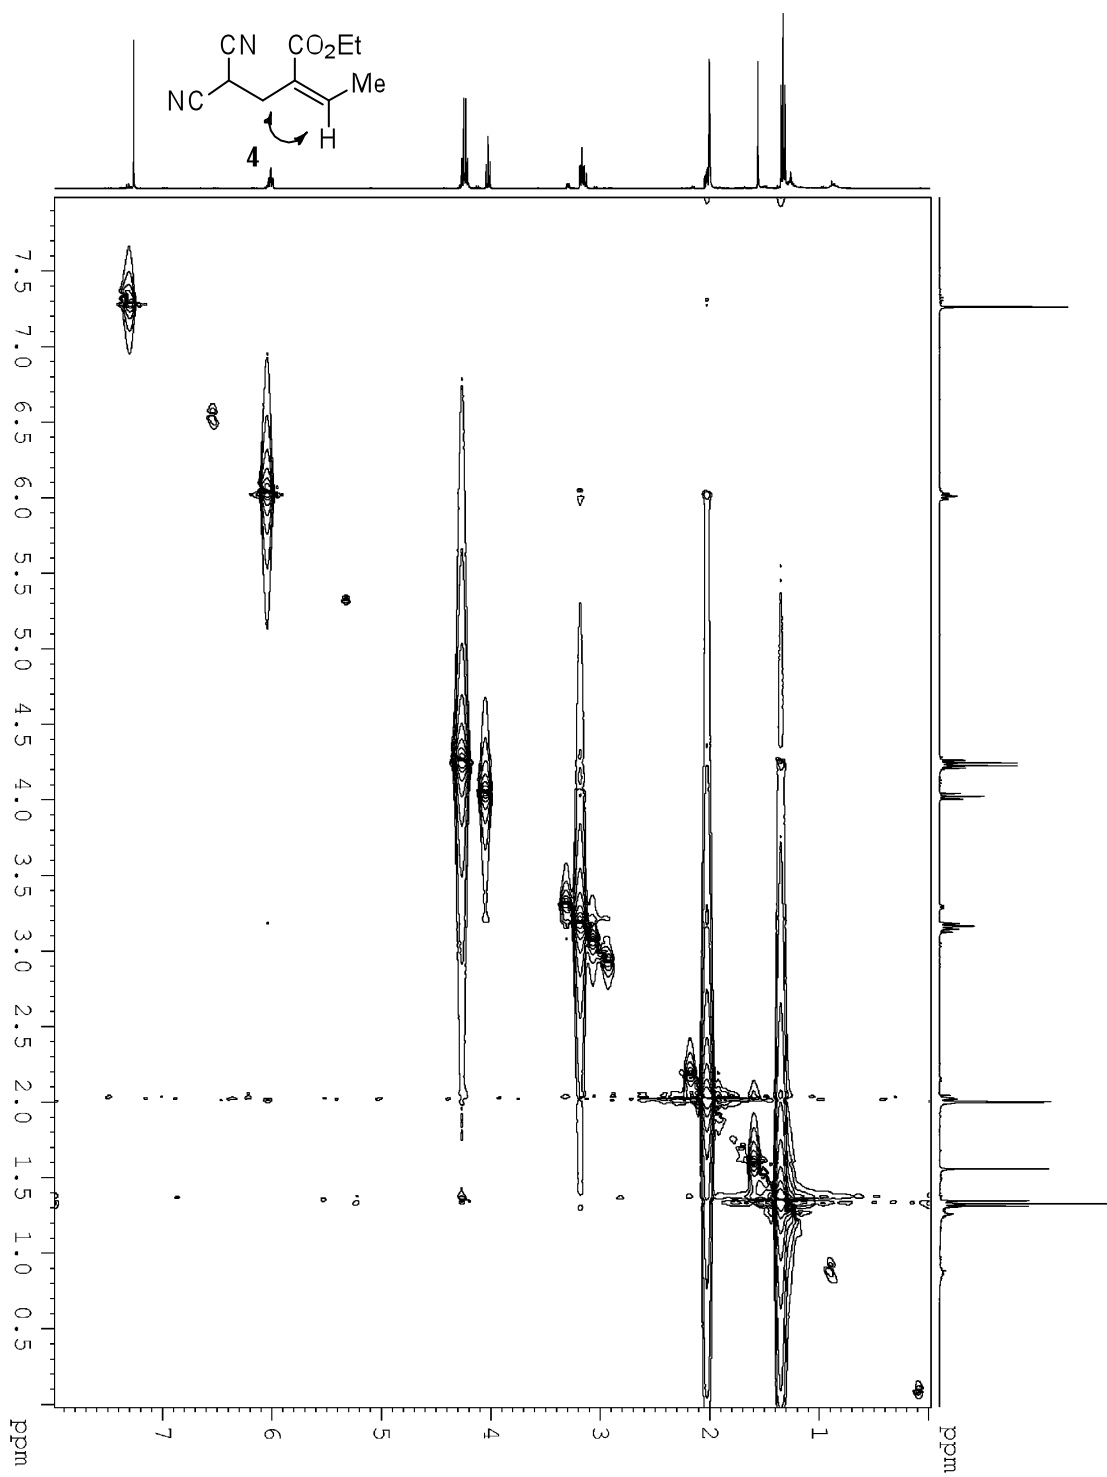

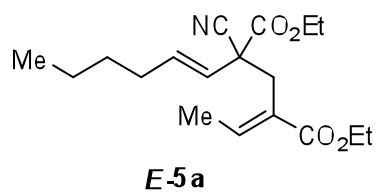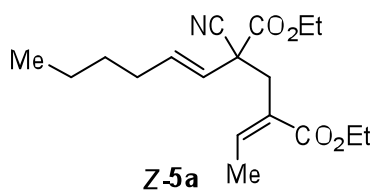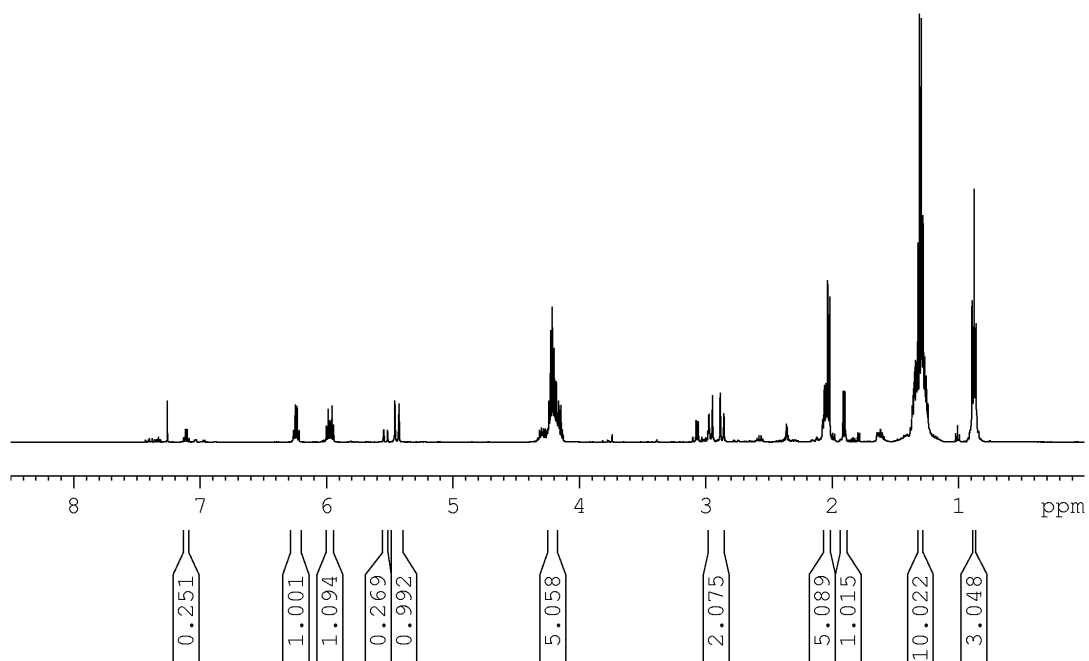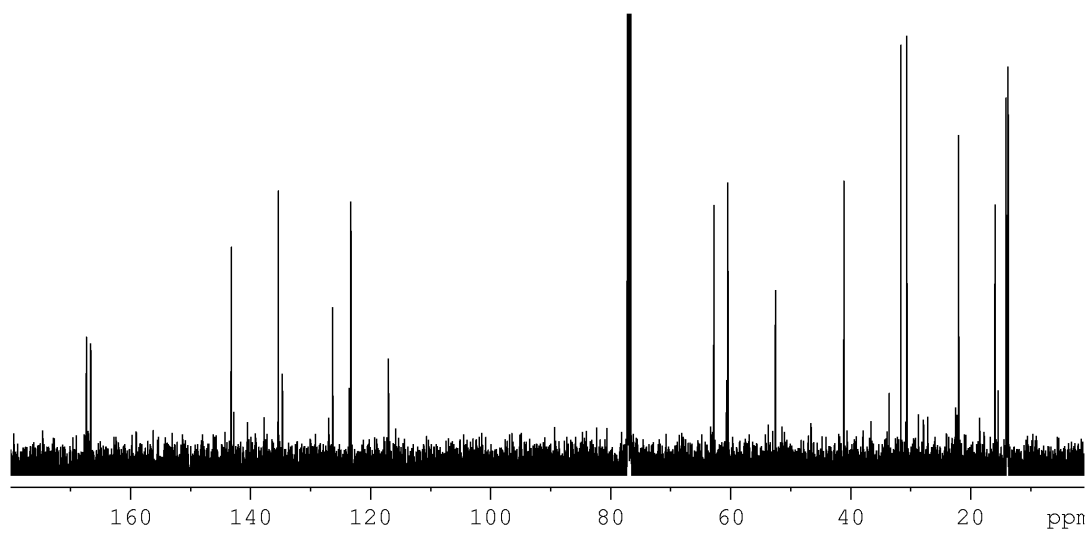



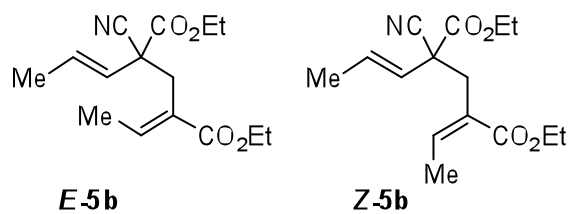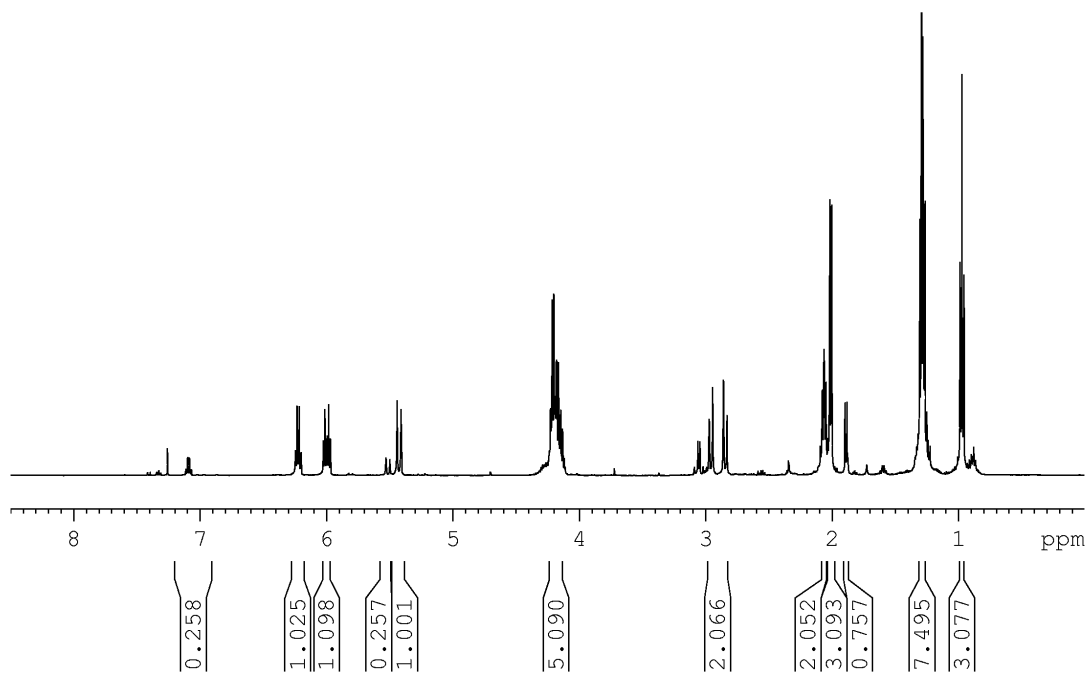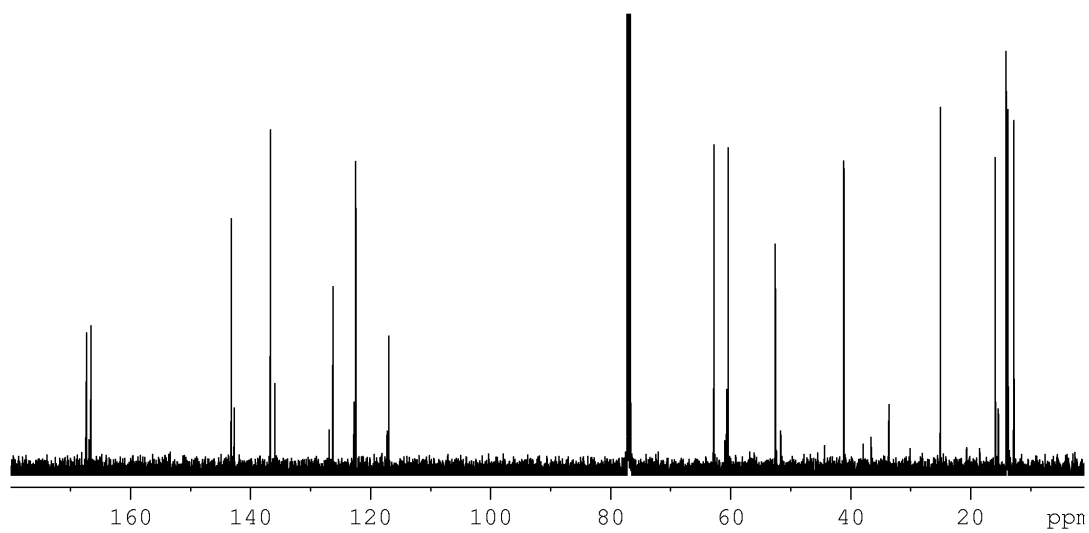

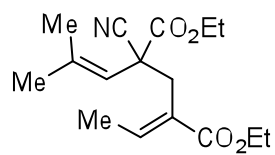**E-5c**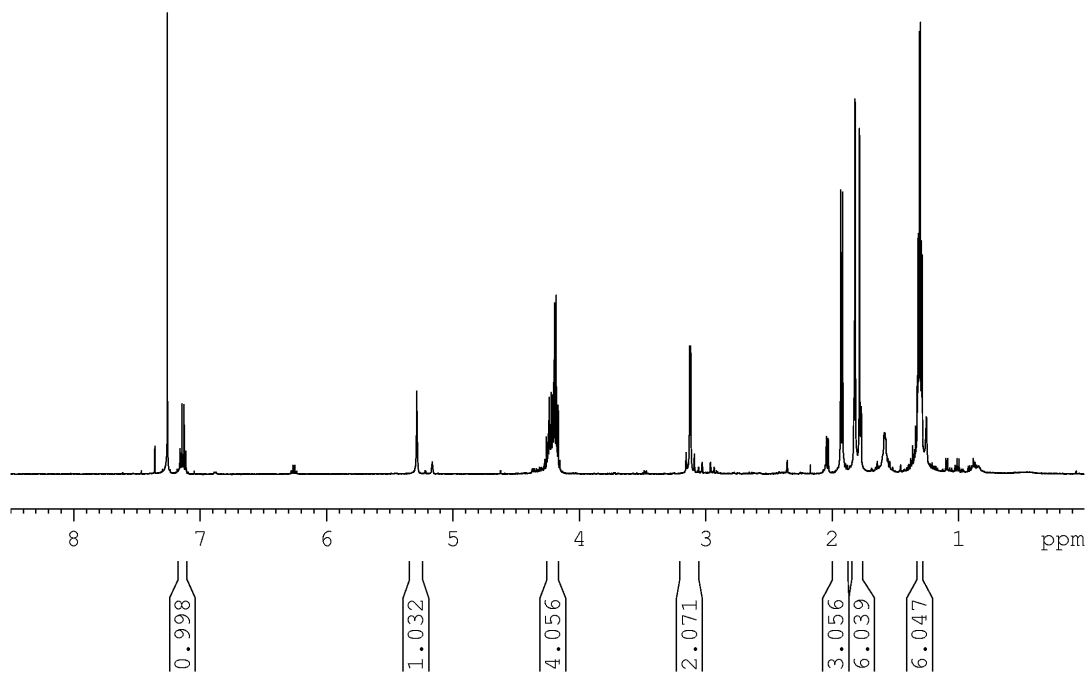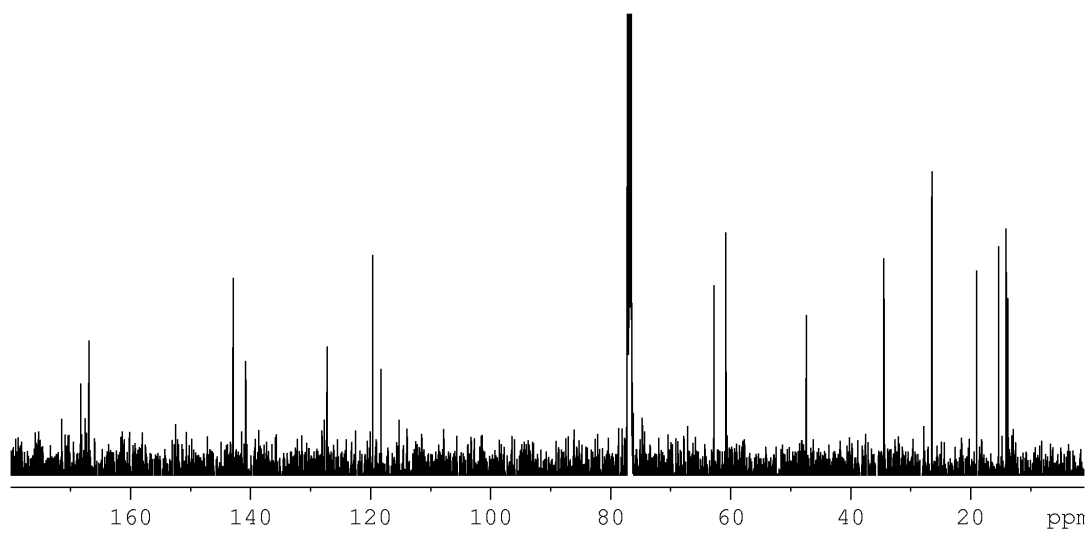

**Compound E-5c NOESY**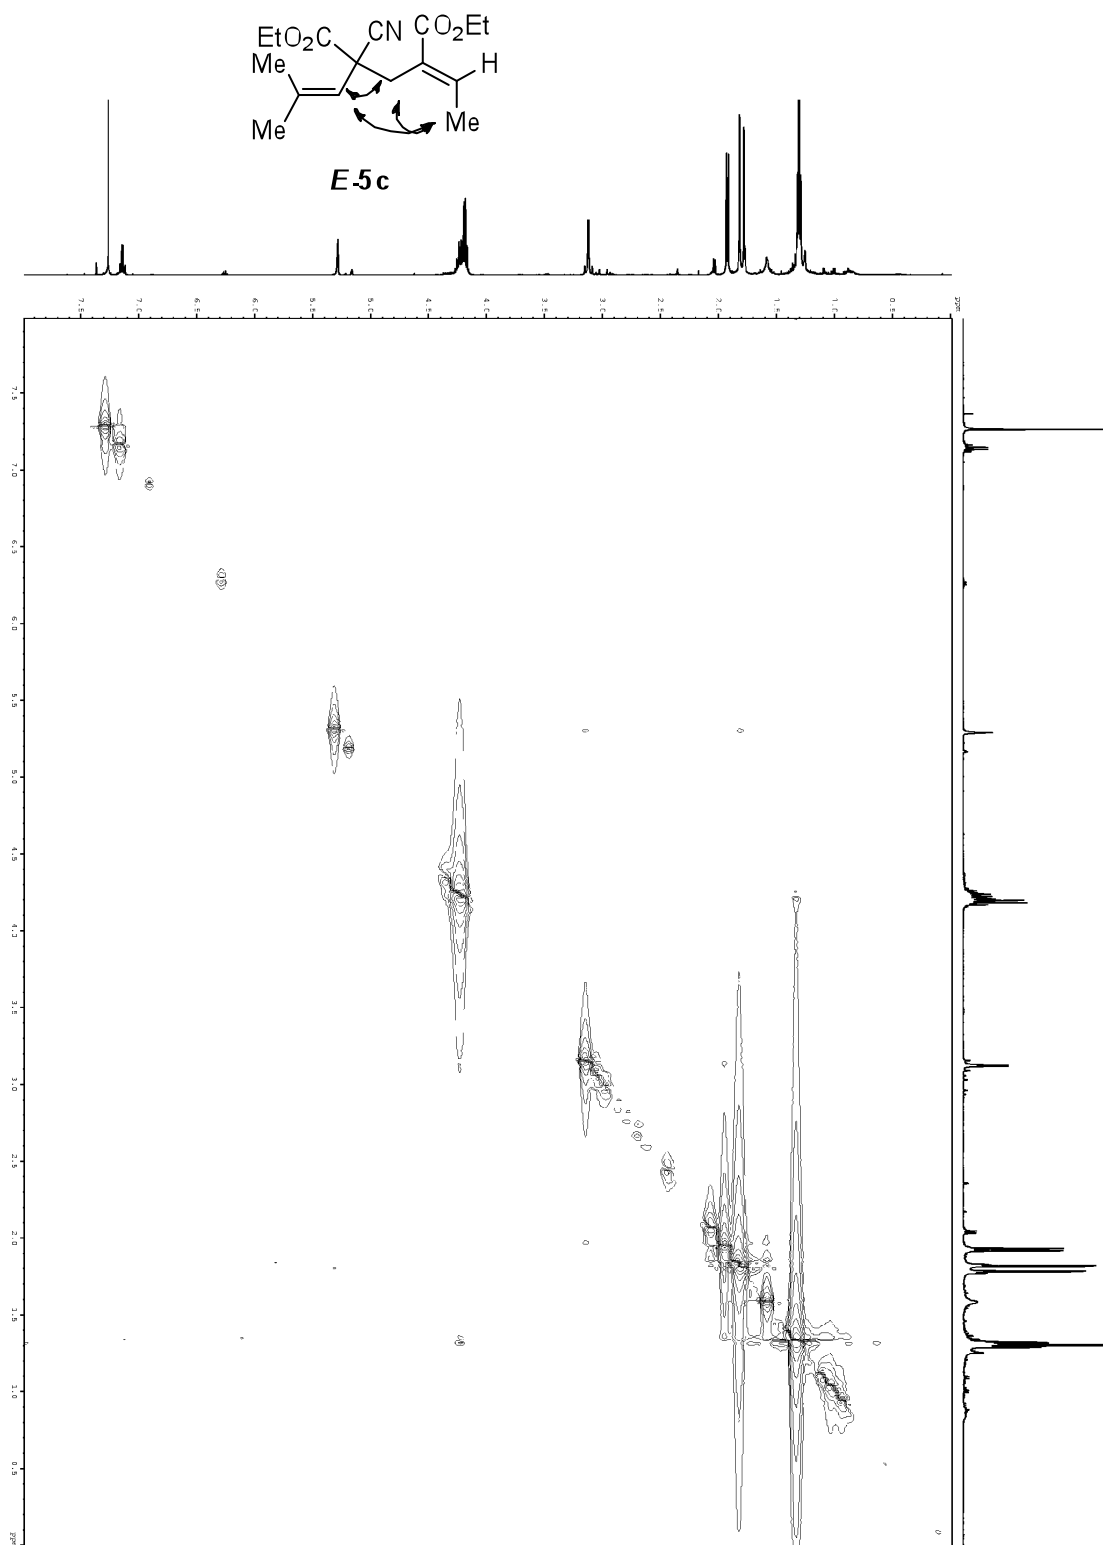

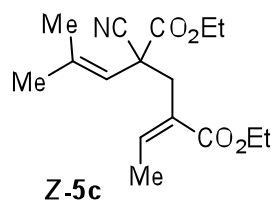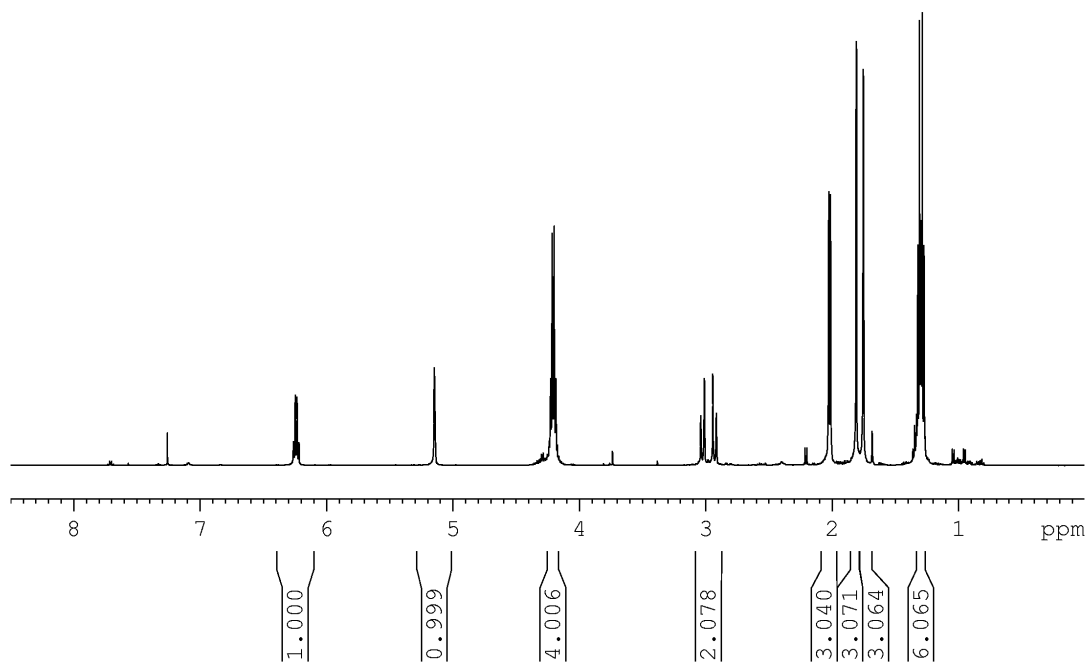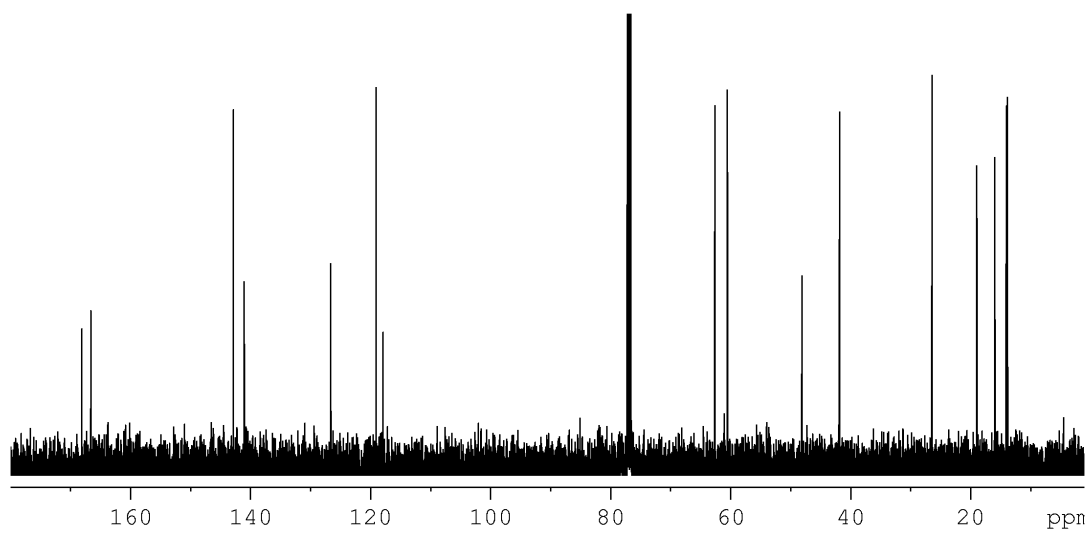

## Compound Z-5c NOESY

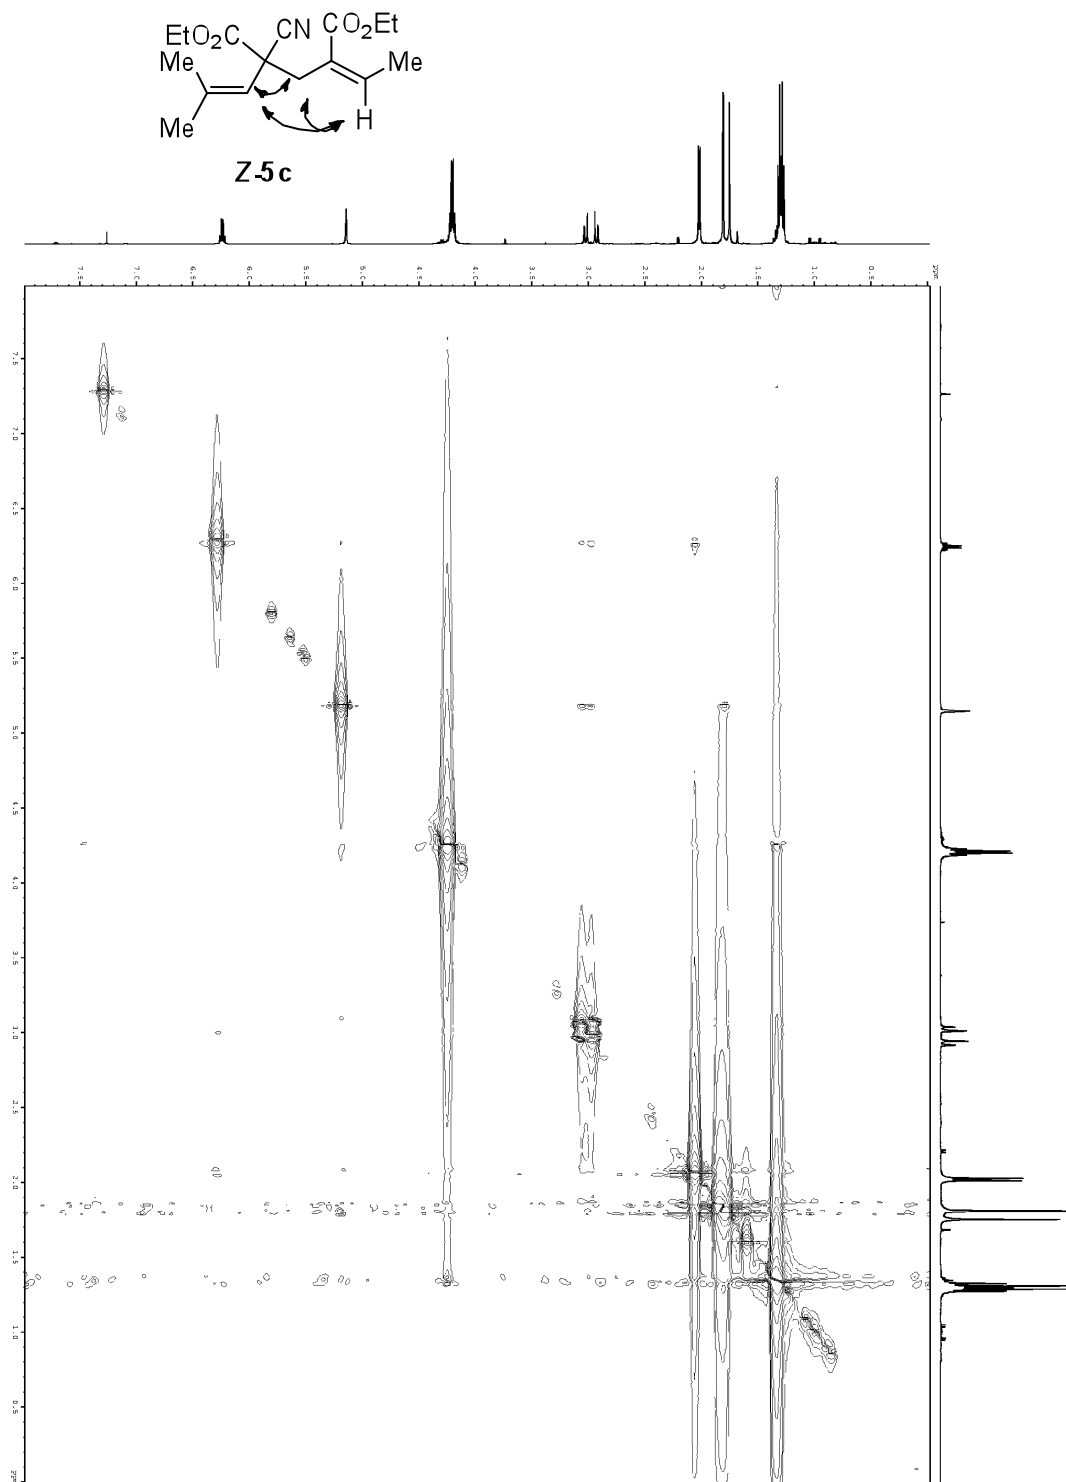

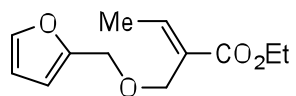

**E-6**

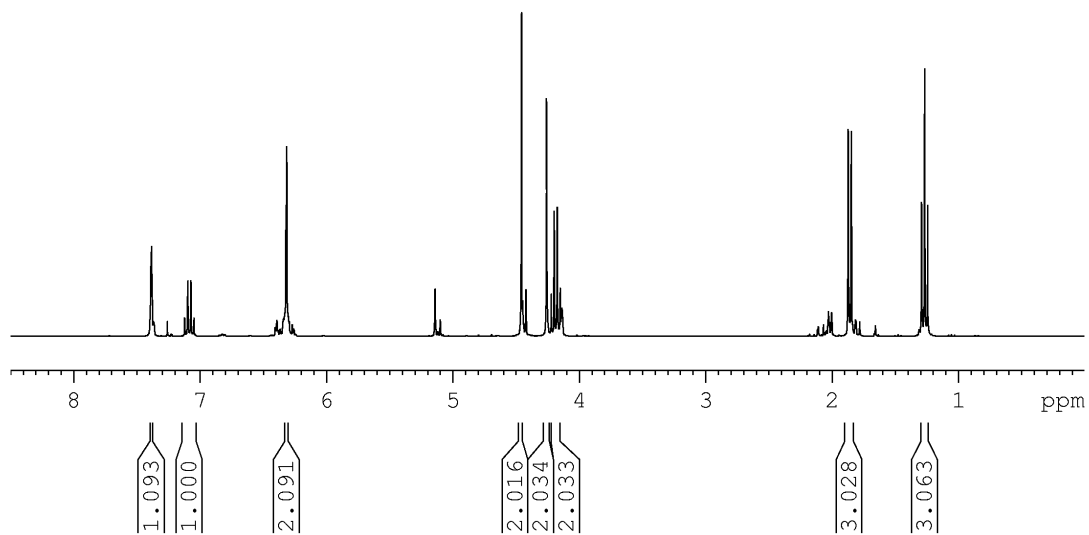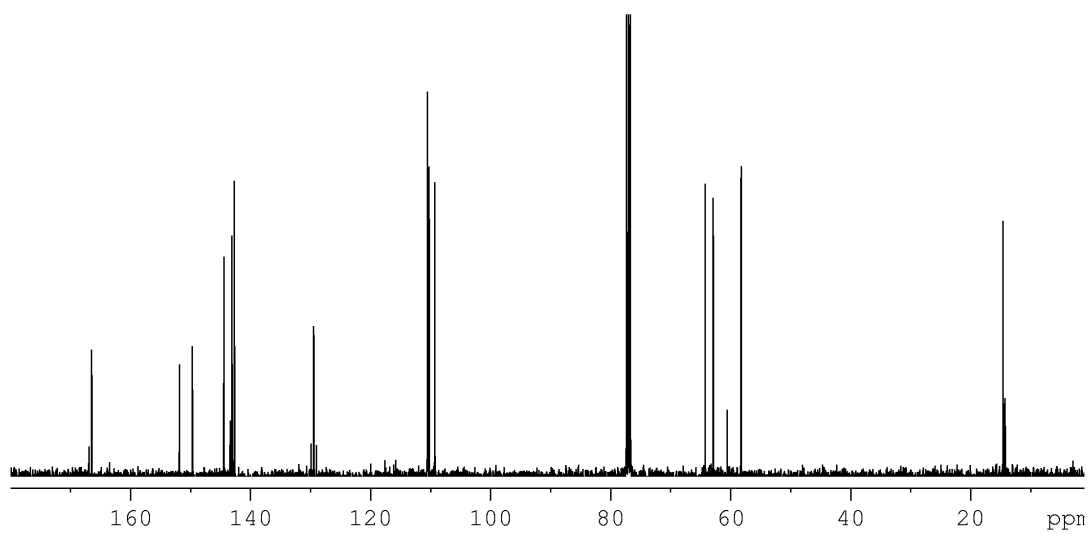

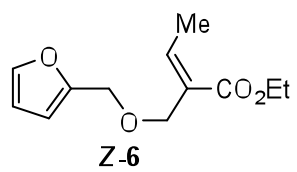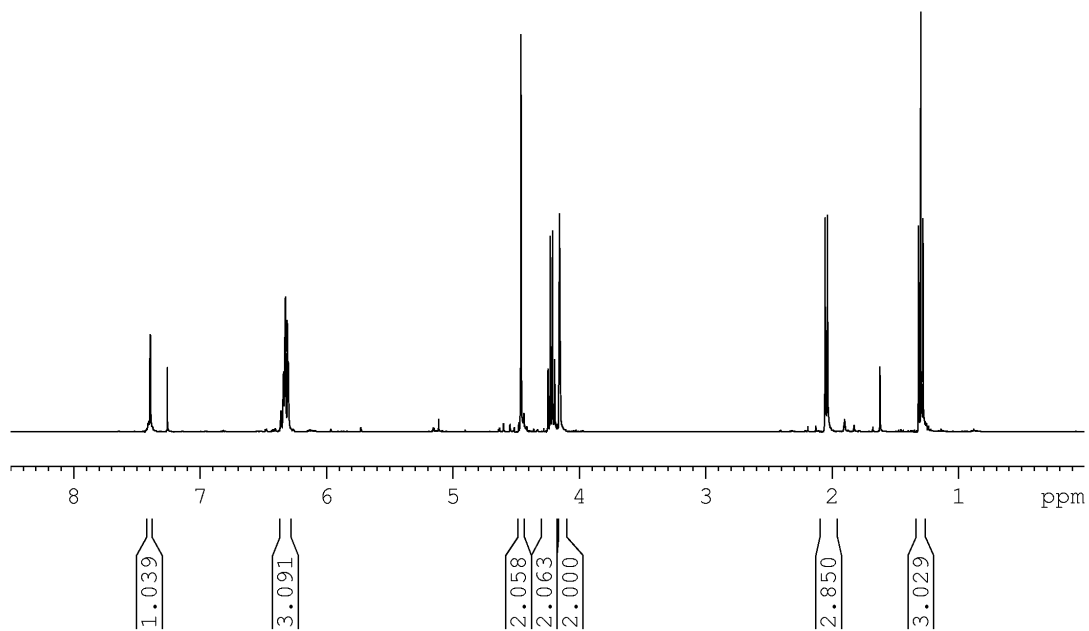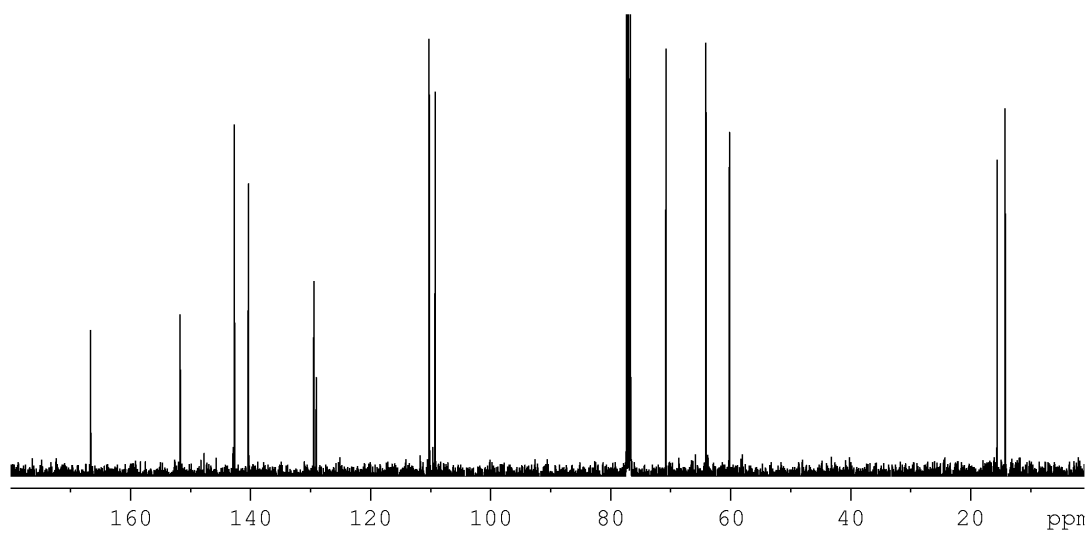

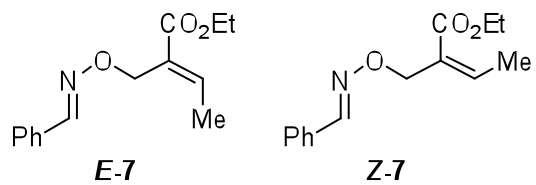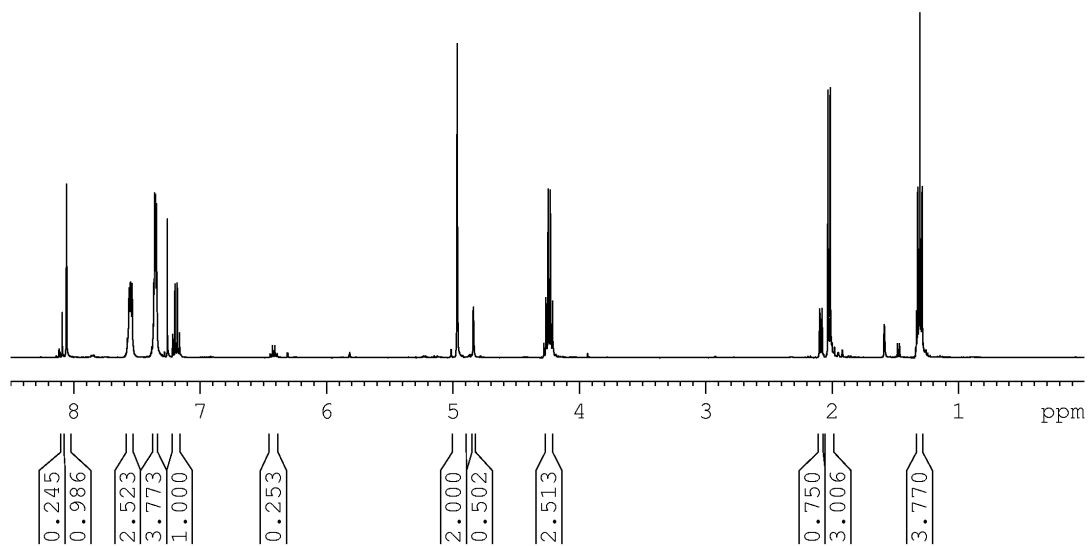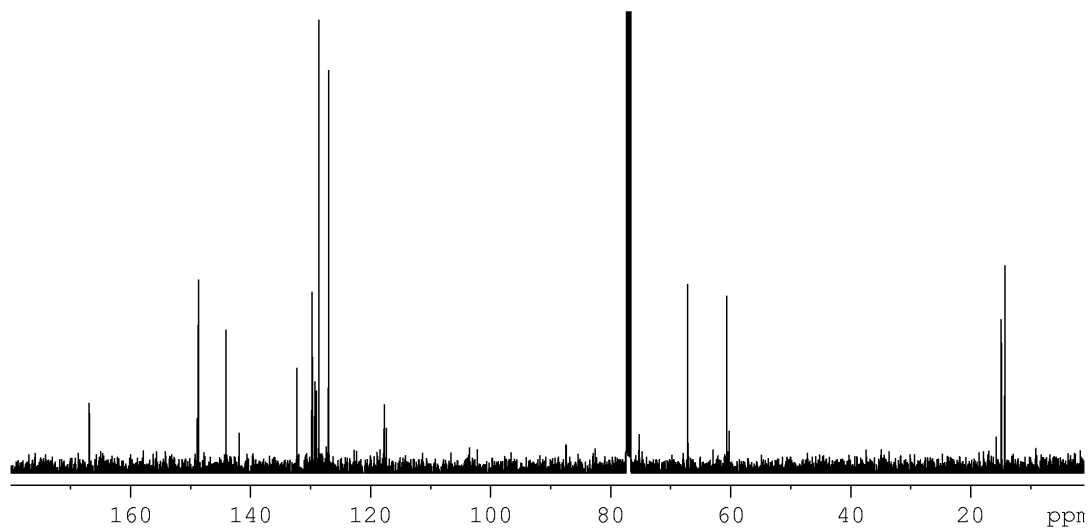



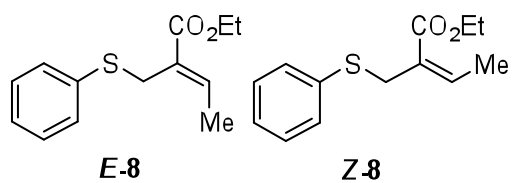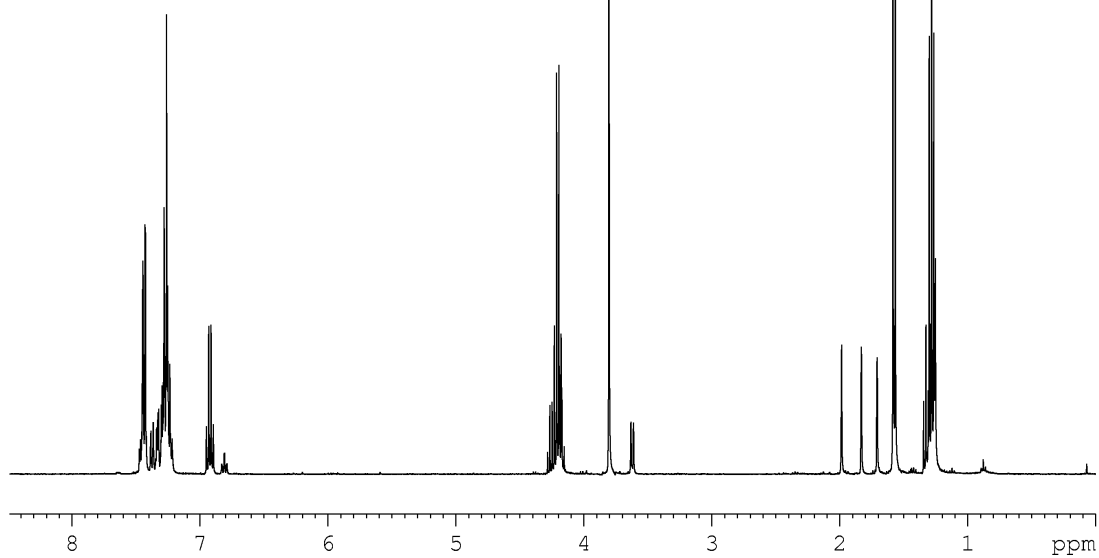

0.341  
2.028  
1.006  
0.385  
1.075  
1.085  
0.186  
1.000  
0.177

0.387  
2.095  
2.036  
0.404

0.604  
3.004  
0.613  
2.980

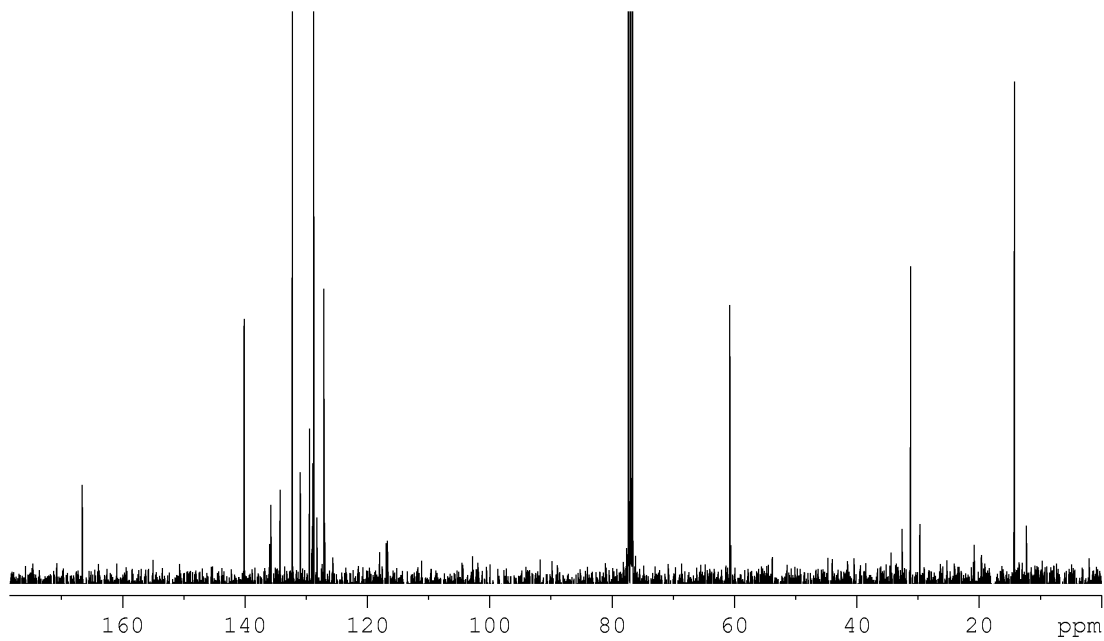

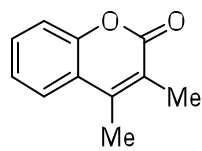

13

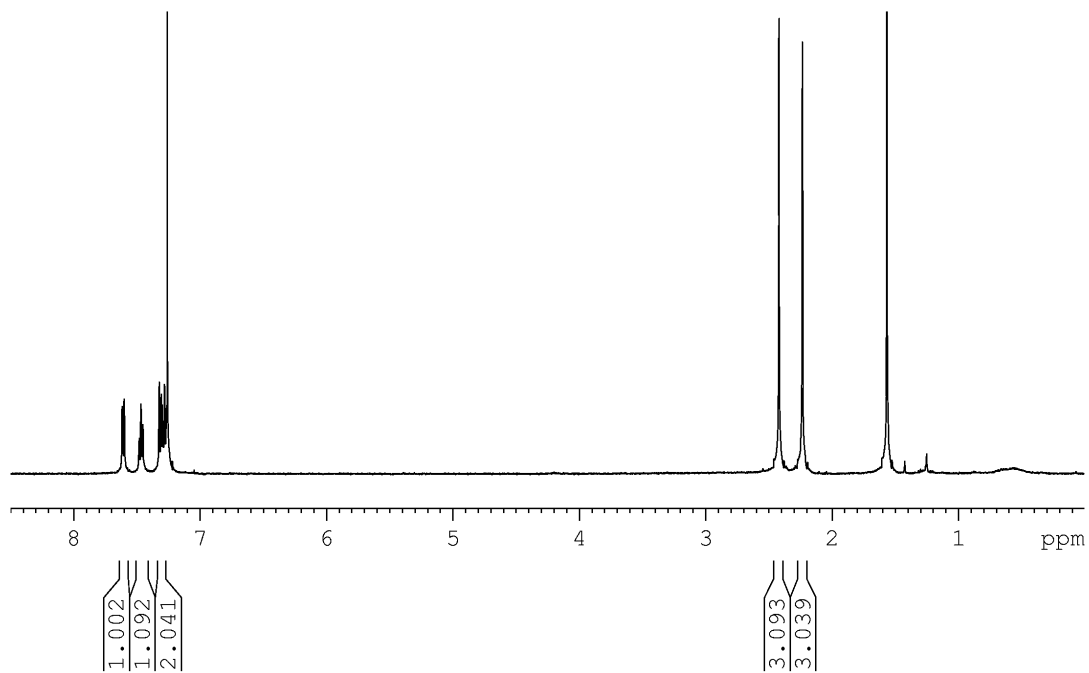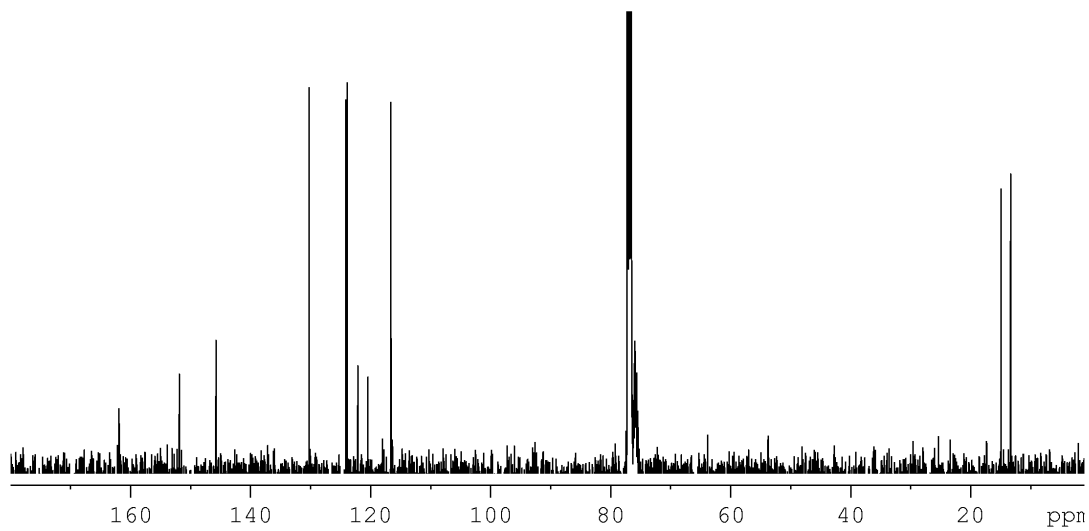

**HPLC Trace of Compound 3c**

Retention of the amino acid chiral center was evidenced through HPLC analysis against the racemic version of compound **3c** using a REGIS (*R,R*)-DACH DNB chiral column (eluent: 2 mL/min 25% DCM in hexane).

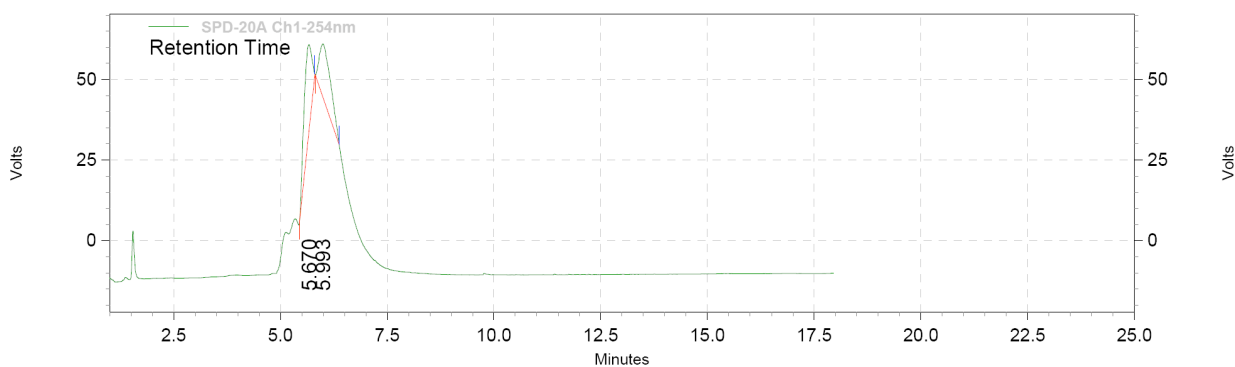

**SPD-20A  
Ch1-254nm  
Results**

| Retention Time | Area   | Area % | Height | Height % |
|----------------|--------|--------|--------|----------|
| 5.670          | 363142 | 53.14  | 26133  | 61.19    |
| 5.993          | 320260 | 46.86  | 16577  | 38.81    |

| Totals | Area   | Area % | Height | Height % |
|--------|--------|--------|--------|----------|
|        | 683402 | 100.00 | 42710  | 100.00   |

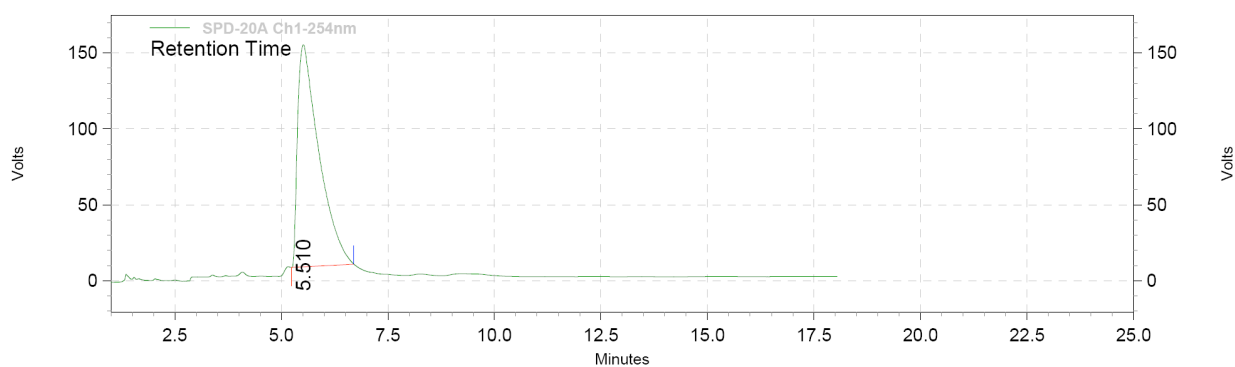

**SPD-20A  
Ch1-254nm  
Results**

| Retention Time | Area    | Area % | Height | Height % |
|----------------|---------|--------|--------|----------|
| 5.510          | 5090770 | 100.00 | 146114 | 100.00   |

| Totals | Area    | Area % | Height | Height % |
|--------|---------|--------|--------|----------|
|        | 5090770 | 100.00 | 146114 | 100.00   |
